# Supplementary material for: Comparative efficacy of therapies for relapsing multiple sclerosis: a systematic review and network meta-analysis
Source: Atypon-hosted journal article supplement (doi:10.57264/cer-2023-0016), 2023-06-02
Supplement: supplementary materials.pdf [file supplementary%20materials.pdf]

## **Supplementary Materials**

### **Title:**

Comparative efficacy of therapies for relapsing multiple sclerosis: a systematic review and network meta-analysis

**Appendix A Literature Review Methods and Results**

**Appendix B Characteristics of Included Trials**

**Appendix C Input Data for Network Meta-analyses**

**Appendix D Additional Results for Network Meta-analyses**

**Appendix E Summary of Direct Evidence and NMA Estimates**

**Appendix F Inconsistency Analysis**

**Appendix G Sensitivity Analyses**

**Reference List**

## Appendix A Literature Review Methods and Results

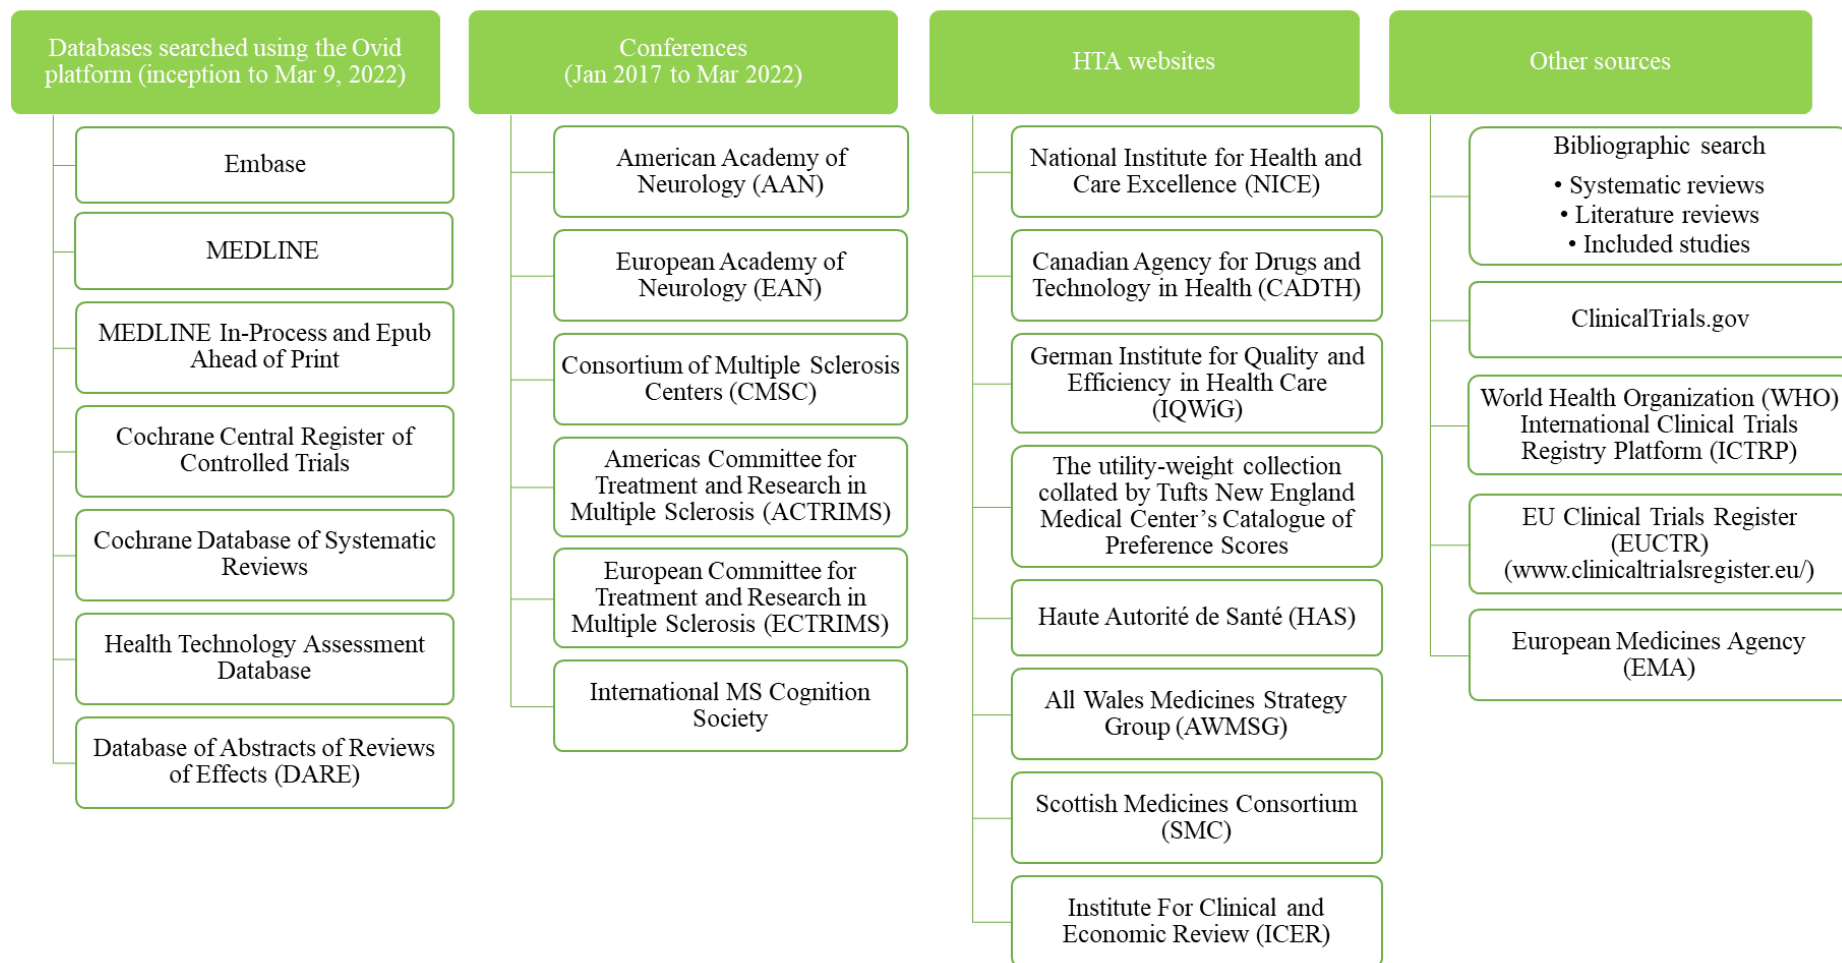

**Figure A.1. Data sources used for the systematic review.**

*Embase* Excerpta Medica Database, *HTA* health technology assessment, *MEDLINE* Medical Literature Analysis and Retrieval System Online.

**Table A.1. Main search strategy on the Ovid platform (searched March 9, 2022).**

| Facet                     | Search Number | Search String                                                                                                                                    | Number of Hits |
|---------------------------|---------------|--------------------------------------------------------------------------------------------------------------------------------------------------|----------------|
| <b>Disease terms</b>      | 1             | exp multiple sclerosis/                                                                                                                          | 414,951        |
|                           | 2             | exp myelitis, transverse/                                                                                                                        | 71,347         |
|                           | 3             | exp neuromyelitis optica/                                                                                                                        | 27,576         |
|                           | 4             | exp demyelinating diseases/                                                                                                                      | 595,877        |
|                           | 5             | 1 or 2 or 3 or 4                                                                                                                                 | 647,283        |
|                           | 6             | (multiple sclerosis or encephalomyelitis or demyelinating disease or neuromyelitis optica or devic or transverse myelitis or optic neuritis).mp. | 644,477        |
|                           | 7             | (relapsing or relaps* or remit* or relapsing remitting*).mp.                                                                                     | 1,342,043      |
|                           | 8             | (RRMS or RMS).mp.                                                                                                                                | 103,510        |
|                           | 9             | 5 or 6                                                                                                                                           | 795,287        |
|                           | 10            | 7 and 9                                                                                                                                          | 131,115        |
|                           | 11            | 8 or 10                                                                                                                                          | 203,683        |
| <b>Study design terms</b> | 12            | exp clinical trial/                                                                                                                              | 5,110,576      |
|                           | 13            | exp control groups/ or exp cross-over studies/ or exp double-blind method/ or exp random allocation/ or exp single-blind method/                 | 1,980,422      |
|                           | 14            | exp randomization/ or exp randomized controlled trial/ or exp "randomized controlled trial (topic)"/                                             | 3,231,181      |
|                           | 15            | exp controlled clinical trial/ or exp "controlled clinical trial (topic)"/                                                                       | 3,448,859      |
|                           | 16            | exp clinical trials as topic/                                                                                                                    | 1,554,476      |
|                           | 17            | exp single blind procedure/                                                                                                                      | 88,296         |
|                           | 18            | exp double blind procedure/                                                                                                                      | 379,225        |
|                           | 19            | exp placebo/ or exp placebo effect/                                                                                                              | 768,311        |
|                           | 20            | clinical trial*.mp.                                                                                                                              | 6,907,190      |
|                           | 21            | control?ed clinical trial.mp.                                                                                                                    | 1,651,384      |
|                           | 22            | randomi#ed controlled trial.mp.                                                                                                                  | 4,232,560      |
|                           | 23            | randomi#ation.mp.                                                                                                                                | 547,387        |
|                           | 24            | rct.mp.                                                                                                                                          | 229,564        |
|                           | 25            | ((random* adj2 allocat*) or (random* adj2 assign*)).tw.                                                                                          | 1,153,912      |
|                           | 26            | ((single or double or triple or treble) adj1 (blind* or mask*)).tw.                                                                              | 1,491,485      |
|                           | 27            | placebo*.mp.                                                                                                                                     | 2,182,590      |
|                           | 28            | exp case mix/ or exp case report/ or exp case study/                                                                                             | 9,936,950      |
|                           | 29            | exp abstract report/                                                                                                                             | 179,987        |
|                           | 30            | exp editorial/ or exp letter/ or exp news/ or exp comment/                                                                                       | 8,028,548      |
|                           | 31            | 28 or 29 or 30                                                                                                                                   | 17,244,857     |
|                           | 32            | 12 or 13 or 14 or 15 or 16 or 17 or 18 or 19 or 20 or 21 or 22 or 23 or 24 or 25 or 26 or 27                                                     | 11,248,621     |
|                           | 33            | 32 not 31                                                                                                                                        | 10,788,880     |
|                           | 34            | exp cohort studies/                                                                                                                              | 6,267,922      |
|                           | 35            | exp cross-sectional studies/                                                                                                                     | 1,665,271      |
|                           | 36            | exp intervention studies/                                                                                                                        | 104,800        |
|                           | 37            | exp comparative study/                                                                                                                           | 6,821,188      |

| Facet                     | Search Number | Search String                                                                                                                                                                                                                                                                                                               | Number of Hits |
|---------------------------|---------------|-----------------------------------------------------------------------------------------------------------------------------------------------------------------------------------------------------------------------------------------------------------------------------------------------------------------------------|----------------|
|                           | 38            | (observational* or real world* or control?ed study).tw.                                                                                                                                                                                                                                                                     | 1,776,453      |
|                           | 39            | (compar* or cohort* or group*).tw.                                                                                                                                                                                                                                                                                          | 42,186,893     |
|                           | 40            | (clinical study or followup or follow up or longitudinal* or prospective*).tw.                                                                                                                                                                                                                                              | 10,769,755     |
|                           | 41            | 33 or 34 or 35 or 36 or 37 or 38 or 39 or 40                                                                                                                                                                                                                                                                                | 54,199,718     |
| <b>Intervention terms</b> | 42            | (Disease modifying therap* or DMT* or disease modifying drug or DMD* or Immunomodulating drug).mp.                                                                                                                                                                                                                          | 112,707        |
|                           | 43            | exp Interferon-beta/                                                                                                                                                                                                                                                                                                        | 370,919        |
|                           | 44            | (interferon adj2 beta).mp.                                                                                                                                                                                                                                                                                                  | 116,096        |
|                           | 45            | (ifn adj2 beta).mp.                                                                                                                                                                                                                                                                                                         | 52,688         |
|                           | 46            | (IFN beta* or IFNbeta*).mp.                                                                                                                                                                                                                                                                                                 | 50,620         |
|                           | 47            | (interferon beta* or interferonbeta*).mp.                                                                                                                                                                                                                                                                                   | 62,512         |
|                           | 48            | (avonex or rebif).mp.                                                                                                                                                                                                                                                                                                       | 9,088          |
|                           | 49            | ((interferon or IFN) adj2 (beta 1a or beta-1a or beta1a)).mp.                                                                                                                                                                                                                                                               | 25,758         |
|                           | 50            | ((interferon or IFN) adj2 (beta 1b or beta1b or beta-1b)) or beta interferon 1b).mp.                                                                                                                                                                                                                                        | 7,784          |
|                           | 51            | (beneseron or betaferon or betaseron or extavia).mp.                                                                                                                                                                                                                                                                        | 6,368          |
|                           | 52            | (Glatiramer or cop 1 or copaxone or copolymer 1).mp.                                                                                                                                                                                                                                                                        | 26,583         |
|                           | 53            | (glatiramer adj2 (acetate or sodium)).mp.                                                                                                                                                                                                                                                                                   | 14,014         |
|                           | 54            | (glatopa or Glatiramer acetate).mp.                                                                                                                                                                                                                                                                                         | 14,072         |
|                           | 55            | (alemtuzumab or campath 1h or anti-CD52 or anti CD52).mp.                                                                                                                                                                                                                                                                   | 44,584         |
|                           | 56            | (CD52 adj2 monoclonal antibody).mp.                                                                                                                                                                                                                                                                                         | 1,288          |
|                           | 57            | (lemtrada or mabcampath).mp.                                                                                                                                                                                                                                                                                                | 1,489          |
|                           | 58            | (natalizumab or antegren or tysabri or ocrelizumab or ocrevus or humani#se anti CD20 antibody).mp.                                                                                                                                                                                                                          | 35,414         |
|                           | 59            | (Fingolimod or FTY720 or FTY 720 or gilenia or gilenya or sphingosine-1-phosphate receptor modulator or sphingosine 1 phosphate receptor modulator or S1P receptor modulator or siponimod or BAF312 or BAF-312 or BAF 312 or mayzent).mp.                                                                                   | 33,725         |
|                           | 60            | (peginterferon beta-1a or peginterferon beta 1a or peginterferon or beta 1a peginterferon or beta 1a peginterferon or peginterferon beta 1a or peginterferon beta-1a or pegylated human interferon beta 1a or pegylated interferon beta 1a or pegylated interferon beta-1a or pegylated interferon beta 1a or plegridy).mp. | 73,268         |
|                           | 61            | (Teriflunomide or A 771726 or A77 1726 or A77-1726 or A771726 or aubagio or hmr 1726 or hmr1726).mp.                                                                                                                                                                                                                        | 9,823          |
|                           | 62            | (dimethyl fumarate or dimethylfumarate or tecfidera or DMF or BG00012 or "BG 00012" or BG-00012).mp.                                                                                                                                                                                                                        | 70,454         |
|                           | 63            | (methyl ester and fumeric acid).mp.                                                                                                                                                                                                                                                                                         | 0              |
|                           | 64            | (mitoxantrone or novantrone).mp.                                                                                                                                                                                                                                                                                            | 66,033         |
|                           | 65            | (cladribine or leustatin or mavenclad).mp.                                                                                                                                                                                                                                                                                  | 21,186         |
|                           | 66            | (Corticosteroid or Methylprednisolone or Medrol or Meprolone or prednisone or dexamethasone or Adrenocorticotropic hormone or ACTH or Acthar or Repository Corticotropin).mp.                                                                                                                                               | 2,010,246      |

| Facet | Search Number | Search String                                                                                                                                 | Number of Hits |
|-------|---------------|-----------------------------------------------------------------------------------------------------------------------------------------------|----------------|
|       | 67            | (Dalfampridine or Ampyra or Fampridine or Amaya or Fampyra or Dalstep).mp.                                                                    | 4,730          |
|       | 68            | (Onabotulinumtoxin A or BOTOX or Incabotulinum toxin A or Botulinum toxin Type A).mp.                                                         | 37,470         |
|       | 69            | (RPC1063 or Ozanimod).mp.                                                                                                                     | 1,516          |
|       | 70            | (Ublituximab or Anti-CD20 Monoclonal Antibody or TG-1101).mp.                                                                                 | 8,762          |
|       | 71            | (Ponesimod or ACT-128800 or ACT128800 or ACT128800).mp.                                                                                       | 767            |
|       | 72            | (ATX-MS- 1467 or ATX-MS-1467 or ATXMS1467).mp.                                                                                                | 50             |
|       | 73            | (Vumerity or ALKS8700 or ALKS 8700 or BIIB098 or Diroximel fumerate or Laquinimod or Nervenra or ABR-215062 or ABR215062 or ABR 215062).mp.   | 2,554          |
|       | 74            | (Donepezil or Aricept).mp.                                                                                                                    | 41,592         |
|       | 75            | (GW-1000-02 or Sativex).mp.                                                                                                                   | 2,309          |
|       | 76            | Nomegastrol acetate.mp.                                                                                                                       | 0              |
|       | 77            | (NU 100 or NU100).mp.                                                                                                                         | 48             |
|       | 78            | (ADS-5102 or amantadine).mp.                                                                                                                  | 46,954         |
|       | 79            | (EGb761 or Tanakan).mp.                                                                                                                       | 1,812          |
|       | 80            | (naltrexone or Pravastatin or Apitox).mp.                                                                                                     | 117,981        |
|       | 81            | (stem cell and (transplantation or therapy or infusion)).mp.                                                                                  | 945,437        |
|       | 82            | hsct.mp.                                                                                                                                      | 97,223         |
|       | 83            | (rituximab or blitzima or mabThera or ritemvia or rituxan or rituxin or rituzena or rixathon or riximyo or truxima or tuxella).mp.            | 255,921        |
|       | 84            | brabio.mp.                                                                                                                                    | 2              |
|       | 85            | (Monoclonal antibod* or Humani#ed monoclonal antibod* or (R 1594 or R 1594 or R-1594 or RG-1594 or "PR 070769" or PR070769 or PR-070769)).mp. | 1,082,861      |
|       | 86            | (Ofatumumab or OMB157 or HYMAX-CD20 2F2 or HUMAXCD20-2F2 or Arzerra or GSK1841157 or GSK-1841157).mp.                                         | 8,690          |
|       | 87            | (Opicinumab or BIIB033 or BIIB-033).mp.                                                                                                       | 407            |
|       | 88            | ((Monoclonal antibody and (human endogenous retrovirus or HERV) and envelope protein) or GNbAC1).mp.                                          | 294            |
|       | 89            | (Polyethylene glycol-interferon-beta- 1a or PEG IFNbeta-1a or Polyethylene glycol-interferon beta-1a).mp.                                     | 46             |
|       | 90            | (Elezanumab or repulsive guidance molecule A or RGMa).mp.                                                                                     | 884            |
|       | 91            | (Lanalumab or VAY736).mp.                                                                                                                     | 105            |
|       | 92            | exp Ofatumumab/                                                                                                                               | 6,546          |
|       | 93            | exp Opicinumab/                                                                                                                               | 191            |
|       | 94            | exp Elezanumab/                                                                                                                               | 33             |
|       | 95            | exp fingolimod/                                                                                                                               | 26,925         |
|       | 96            | exp glatiramer/                                                                                                                               | 22,160         |
|       | 97            | exp alemtuzumab/                                                                                                                              | 39,320         |
|       | 98            | exp natalizumab/                                                                                                                              | 26,761         |

| Facet                                                     | Search Number | Search String                         | Number of Hits |
|-----------------------------------------------------------|---------------|---------------------------------------|----------------|
|                                                           | 99            | exp siponimod/                        | 1,141          |
|                                                           | 100           | exp ocrelizumab/                      | 5,089          |
|                                                           | 101           | exp peginterferon beta1a/             | 1,151          |
|                                                           | 102           | exp teriflunomide/                    | 7,036          |
|                                                           | 103           | exp fumaric acid dimethyl ester/      | 5,416          |
|                                                           | 104           | exp mitoxantrone/                     | 58,493         |
|                                                           | 105           | exp cladribine/                       | 18,847         |
|                                                           | 106           | exp Methylprednisolone/               | 255,137        |
|                                                           | 107           | exp Corticosteroid/                   | 2,806,558      |
|                                                           | 108           | exp Ozanimod/                         | 898            |
|                                                           | 109           | exp Ublituximab/                      | 469            |
|                                                           | 110           | exp Ponesimod/                        | 422            |
|                                                           | 111           | exp Laquinimod/                       | 1,780          |
|                                                           | 112           | exp Donepezil/                        | 33,176         |
|                                                           | 113           | exp Megestrol/                        | 6,850          |
|                                                           | 114           | exp amantadine/                       | 46,256         |
|                                                           | 115           | exp pravastatin/                      | 50,096         |
|                                                           | 116           | exp Tanakan/                          | 15,114         |
|                                                           | 117           | exp Rituximab/                        | 212,994        |
|                                                           | 118           | exp stem cell transplantation/        | 519,948        |
|                                                           | 119           | Megestrol acetate.mp.                 | 15,405         |
|                                                           | 120           | OR/42-119                             | 6,115,642      |
| <b>Combine (disease, study design, and interventions)</b> | 121           | 11 and 41 and 120                     | 54,390         |
| <b>Limit to English language, humans</b>                  | 122           | limit 121 to English language, humans | 46,231         |
| <b>Final after removing duplicates</b>                    | 123           | remove duplicates from 122            | 18,803         |

**Table A.2. Additional search strategy on the Ovid platform including additional terms for unlicensed interventions (March 2022 update only, searched March 9, 2022).**

| Facet                     | Search Number                                                                                | Search String                                                                                                                                    | Number of Hits |
|---------------------------|----------------------------------------------------------------------------------------------|--------------------------------------------------------------------------------------------------------------------------------------------------|----------------|
| <b>Disease terms</b>      | 1                                                                                            | exp multiple sclerosis/                                                                                                                          | 213,048        |
|                           | 2                                                                                            | exp myelitis, transverse/                                                                                                                        | 5,669          |
|                           | 3                                                                                            | exp neuromyelitis optica/                                                                                                                        | 14,572         |
|                           | 4                                                                                            | exp demyelinating diseases/                                                                                                                      | 305,755        |
|                           | 5                                                                                            | 1 or 2 or 3 or 4                                                                                                                                 | 310,607        |
|                           | 6                                                                                            | (multiple sclerosis or encephalomyelitis or demyelinating disease or neuromyelitis optica or devic or transverse myelitis or optic neuritis).mp. | 329,970        |
|                           | 7                                                                                            | (relapsing or relaps* or remit* or relapsing remitting*).mp.                                                                                     | 688,881        |
|                           | 8                                                                                            | (RRMS or RMS).mp.                                                                                                                                | 53,254         |
|                           | 9                                                                                            | 5 or 6                                                                                                                                           | 393,109        |
|                           | 10                                                                                           | 7 and 9                                                                                                                                          | 67,361         |
|                           | 11                                                                                           | 8 or 10                                                                                                                                          | 104,531        |
| <b>Study design terms</b> | 12                                                                                           | exp clinical trial/                                                                                                                              | 2,608,970      |
|                           | 13                                                                                           | exp control groups/ or exp cross-over studies/ or exp double-blind method/ or exp random allocation/ or exp single-blind method/                 | 1,005,491      |
|                           | 14                                                                                           | exp randomization/ or exp randomized controlled trial/ or exp "randomized controlled trial (topic)"/                                             | 1,658,876      |
|                           | 15                                                                                           | exp controlled clinical trial/ or exp "controlled clinical trial (topic)"/                                                                       | 1,767,018      |
|                           | 16                                                                                           | exp clinical trials as topic/                                                                                                                    | 798,106        |
|                           | 17                                                                                           | exp single blind procedure/                                                                                                                      | 45,420         |
|                           | 18                                                                                           | exp double blind procedure/                                                                                                                      | 192,990        |
|                           | 19                                                                                           | exp placebo/ or exp placebo effect/                                                                                                              | 388,229        |
|                           | 20                                                                                           | clinical trial*.mp.                                                                                                                              | 3,519,787      |
|                           | 21                                                                                           | control?ed clinical trial.mp.                                                                                                                    | 825,683        |
|                           | 22                                                                                           | randomi#ed controlled trial.mp.                                                                                                                  | 2,185,264      |
|                           | 23                                                                                           | randomi#ation.mp.                                                                                                                                | 279,715        |
|                           | 24                                                                                           | rct.mp.                                                                                                                                          | 117,963        |
|                           | 25                                                                                           | ((random* adj2 allocat*) or (random* adj2 assign*)).tw.                                                                                          | 590,471        |
|                           | 26                                                                                           | ((single or double or triple or treble) adj1 (blind* or mask*)).tw.                                                                              | 759,122        |
| 27                        | placebo*.mp.                                                                                 | 1,107,456                                                                                                                                        |                |
| 28                        | exp case mix/ or exp case report/ or exp case study/                                         | 5,050,930                                                                                                                                        |                |
| 29                        | exp abstract report/                                                                         | 89,541                                                                                                                                           |                |
| 30                        | exp editorial/ or exp letter/ or exp news/ or exp comment/                                   | 4,069,790                                                                                                                                        |                |
| 31                        | 28 or 29 or 30                                                                               | 8,755,417                                                                                                                                        |                |
| 32                        | 12 or 13 or 14 or 15 or 16 or 17 or 18 or 19 or 20 or 21 or 22 or 23 or 24 or 25 or 26 or 27 | 5,751,551                                                                                                                                        |                |
| 33                        | 32 not 31                                                                                    | 5,517,016                                                                                                                                        |                |
| 34                        | exp cohort studies/                                                                          | 3,282,482                                                                                                                                        |                |
| 35                        | exp cross-sectional studies/                                                                 | 886,828                                                                                                                                          |                |
| 36                        | exp intervention studies/                                                                    | 54,288                                                                                                                                           |                |

| Facet                     | Search Number | Search String                                                                                                                                                                                                                                                                                                             | Number of Hits |
|---------------------------|---------------|---------------------------------------------------------------------------------------------------------------------------------------------------------------------------------------------------------------------------------------------------------------------------------------------------------------------------|----------------|
|                           | 37            | exp comparative study/                                                                                                                                                                                                                                                                                                    | 3,450,186      |
|                           | 38            | (observational* or real world* or control?ed study).tw.                                                                                                                                                                                                                                                                   | 932,652        |
|                           | 39            | (compar* or cohort* or group*).tw.                                                                                                                                                                                                                                                                                        | 21,618,233     |
|                           | 40            | (clinical study or followup or follow up or longitudinal* or prospective*).tw.                                                                                                                                                                                                                                            | 5,534,282      |
|                           | 41            | 33 or 34 or 35 or 36 or 37 or 38 or 39 or 40                                                                                                                                                                                                                                                                              | 27,757,705     |
| <b>Intervention terms</b> | 42            | (Disease modifying therap* or DMT* or disease modifying drug or DMD* or Immunomodulating drug).mp.                                                                                                                                                                                                                        | 58,693         |
|                           | 43            | exp Interferon-beta/                                                                                                                                                                                                                                                                                                      | 333,707        |
|                           | 44            | (interferon adj2 beta).mp.                                                                                                                                                                                                                                                                                                | 58,994         |
|                           | 45            | (ifn adj2 beta).mp.                                                                                                                                                                                                                                                                                                       | 26,756         |
|                           | 46            | (IFN beta* or IFNbeta*).mp.                                                                                                                                                                                                                                                                                               | 25,786         |
|                           | 47            | (interferon beta* or interferonbeta*).mp.                                                                                                                                                                                                                                                                                 | 31,601         |
|                           | 48            | (avonex or rebif).mp.                                                                                                                                                                                                                                                                                                     | 4,534          |
|                           | 49            | ((interferon or IFN) adj2 (beta 1a or beta-1a or beta1a)).mp.                                                                                                                                                                                                                                                             | 13,044         |
|                           | 50            | ((interferon or IFN) adj2 (beta 1b or beta1b or beta-1b)) or beta interferon 1b).mp.                                                                                                                                                                                                                                      | 4,010          |
|                           | 51            | (beneseron or betaferon or betaseron or extavia).mp.                                                                                                                                                                                                                                                                      | 3,170          |
|                           | 52            | (Glatiramer or cop 1 or copaxone or copolymer 1).mp.                                                                                                                                                                                                                                                                      | 13,568         |
|                           | 53            | (glatiramer adj2 (acetate or sodium)).mp.                                                                                                                                                                                                                                                                                 | 7,113          |
|                           | 54            | (glatopa or Glatiramer acetate).mp.                                                                                                                                                                                                                                                                                       | 7,144          |
|                           | 55            | (alemtuzumab or campath 1h or anti-CD52 or anti CD52).mp.                                                                                                                                                                                                                                                                 | 22,842         |
|                           | 56            | (CD52 adj2 monoclonal antibody).mp.                                                                                                                                                                                                                                                                                       | 662            |
|                           | 57            | (lemtrada or mabcampath).mp.                                                                                                                                                                                                                                                                                              | 753            |
|                           | 58            | (natalizumab or antegren or tysabri or ocrelizumab or ocrevus or humani#se anti CD20 antibody).mp.                                                                                                                                                                                                                        | 18,450         |
|                           | 59            | (Fingolimod or FTY720 or FTY 720 or gilenia or gilenya or sphingosine-1-phosphate receptor modulator or sphingosine 1 phosphate receptor modulator or S1P receptor modulator or siponimod or BAF312 or BAF-312 or BAF 312 or mayzent).mp.                                                                                 | 17,570         |
|                           | 60            | (peginterferon beta-1a or peginterferon beta 1a or peginterferon or beta 1a peginterferon or beta1a peginterferon or peginterferon beta 1a or peginterferon beta-1a or pegylated human interferon beta 1a or pegylated interferon beta 1a or pegylated interferon beta-1a or pegylated interferon beta1a or plegridy).mp. | 36,699         |
|                           | 61            | (Teriflunomide or A 771726 or A77 1726 or A77-1726 or A771726 or aubagio or hmr 1726 or hmr1726).mp.                                                                                                                                                                                                                      | 5,241          |
|                           | 62            | (dimethyl fumarate or dimethylfumarate or tecfidera or DMF or BG00012 or "BG 00012" or BG-00012).mp.                                                                                                                                                                                                                      | 36,254         |
|                           | 63            | (methyl ester and fumeric acid).mp.                                                                                                                                                                                                                                                                                       | 0              |
|                           | 64            | (mitoxantrone or novantrone).mp.                                                                                                                                                                                                                                                                                          | 33,269         |
|                           | 65            | (cladribine or leustatin or mavenclad).mp.                                                                                                                                                                                                                                                                                | 10,936         |

| Facet | Search Number | Search String                                                                                                                                                                  | Number of Hits |
|-------|---------------|--------------------------------------------------------------------------------------------------------------------------------------------------------------------------------|----------------|
|       | 66            | (Corticosteroid or Methylprednisolone or Medrol or Meprolone or prednisone or dexamethasone or Adrenocorticotrophic hormone or ACTH or Acthar or Repository Corticotropin).mp. | 1,025,407      |
|       | 67            | (Dalfampridine or Ampyra or Fampridine or Amaya or Fampyra or Dalstep).mp.                                                                                                     | 2,446          |
|       | 68            | (Onabotulinumtoxin A or BOTOX or Incabotulinum toxin A or Botulinum toxin Type A).mp.                                                                                          | 19,096         |
|       | 69            | (RPC1063 or Ozanimod).mp.                                                                                                                                                      | 876            |
|       | 70            | (Ublituximab or Anti-CD20 Monoclonal Antibody or TG-1101).mp.                                                                                                                  | 4,572          |
|       | 71            | (Ponesimod or ACT-128800 or ACT128800 or ACT128800).mp.                                                                                                                        | 422            |
|       | 72            | (ATX-MS- 1467 or ATX-MS-1467 or ATXMS1467).mp.                                                                                                                                 | 25             |
|       | 73            | (Vumerity or ALKS8700 or ALKS 8700 or BIIB098 or Diroximel fumerate or Laquinimod or Nervertra or ABR-215062 or ABR215062 or ABR 215062).mp.                                   | 1,287          |
|       | 74            | (Donepezil or Aricept).mp.                                                                                                                                                     | 21,212         |
|       | 75            | (GW-1000-02 or Sativex).mp.                                                                                                                                                    | 1,173          |
|       | 76            | Nomegastrol acetate.mp.                                                                                                                                                        | 0              |
|       | 77            | (NU 100 or NU100).mp.                                                                                                                                                          | 24             |
|       | 78            | (ADS-5102 or amantadine).mp.                                                                                                                                                   | 23,663         |
|       | 79            | (EGb761 or Tanakan).mp.                                                                                                                                                        | 911            |
|       | 80            | (naltrexone or Pravastatin or Apitox).mp.                                                                                                                                      | 59,470         |
|       | 81            | (stem cell and (transplantation or therapy or infusion)).mp.                                                                                                                   | 488,062        |
|       | 82            | hsct.mp.                                                                                                                                                                       | 50,781         |
|       | 83            | (rituximab or blitzima or mabThera or ritemvia or rituxan or rituxin or rituzena or rixathon or riximyo or truxima or tuxella).mp.                                             | 133,516        |
|       | 84            | brabio.mp.                                                                                                                                                                     | 1              |
|       | 85            | (Monoclonal antibod* or Humani#ed monoclonal antibod* or (R 1594 or R 1594 or R-1594 or RG-1594 or "PR 070769" or PR070769 or PR-070769)).mp.                                  | 548,429        |
|       | 86            | (Ofatumumab or OMB157 or HYMAX-CD20 2F2 or HUMAXCD20-2F2 or Arzerra or GSK1841157 or GSK-1841157).mp.                                                                          | 4,511          |
|       | 87            | (Opicinumab or BIIB033 or BIIB-033).mp.                                                                                                                                        | 211            |
|       | 88            | ((Monoclonal antibody and (human endogenous retrovirus or HERV) and envelope protein) or GNbAC1).mp.                                                                           | 151            |
|       | 89            | (Polyethylene glycol-interferon-beta- 1a or PEG IFNbeta-1a or Polyethylene glycol-interferon beta-1a).mp.                                                                      | 23             |
|       | 90            | (Elezanumab or repulsive guidance molecule A or RGMa).mp.                                                                                                                      | 466            |
|       | 91            | (Lanalumab or VAY736).mp.                                                                                                                                                      | 56             |
|       | 92            | exp Ofatumumab/                                                                                                                                                                | 3,395          |
|       | 93            | exp Opicinumab/                                                                                                                                                                | 100            |
|       | 94            | exp Elezanumab/                                                                                                                                                                | 21             |

| Facet | Search Number | Search String                                                                                                    | Number of Hits |
|-------|---------------|------------------------------------------------------------------------------------------------------------------|----------------|
|       | 95            | exp fingolimod/                                                                                                  | 14,020         |
|       | 96            | exp glatiramer/                                                                                                  | 11,345         |
|       | 97            | exp alemtuzumab/                                                                                                 | 20,188         |
|       | 98            | exp natalizumab/                                                                                                 | 13,860         |
|       | 99            | exp siponimod/                                                                                                   | 652            |
|       | 100           | exp ocrelizumab/                                                                                                 | 2,858          |
|       | 101           | exp peginterferon beta1a/                                                                                        | 606            |
|       | 102           | exp teriflunomide/                                                                                               | 3,778          |
|       | 103           | exp fumaric acid dimethyl ester/                                                                                 | 842            |
|       | 104           | exp mitoxantrone/                                                                                                | 29,457         |
|       | 105           | exp cladribine/                                                                                                  | 9,718          |
|       | 106           | exp Methylprednisolone/                                                                                          | 131,018        |
|       | 107           | exp Corticosteroid/                                                                                              | 1,428,173      |
|       | 108           | exp Ozanimod/                                                                                                    | 529            |
|       | 109           | exp Ublituximab/                                                                                                 | 261            |
|       | 110           | exp Ponesimod/                                                                                                   | 238            |
|       | 111           | exp Laquinimod/                                                                                                  | 895            |
|       | 112           | exp Donepezil/                                                                                                   | 16,939         |
|       | 113           | exp Megestrol/                                                                                                   | 3,443          |
|       | 114           | exp amantadine/                                                                                                  | 23,341         |
|       | 115           | exp pravastatin/                                                                                                 | 25,114         |
|       | 116           | exp Tanakan/                                                                                                     | 7,582          |
|       | 117           | exp Rituximab/                                                                                                   | 111,080        |
|       | 118           | exp stem cell transplantation/                                                                                   | 268,499        |
|       | 119           | Megestrol acetate.mp.                                                                                            | 7,731          |
|       | 120           | OR/42-119                                                                                                        | 3,237,906      |
|       | 121           | (INV-103 or INV103 or INV 103).af.                                                                               | 1              |
|       | 122           | (IR-902 or IR902 or IR 902).af.                                                                                  | 5              |
|       | 123           | (imilecleucel-T or imilecleucel T).af.                                                                           | 16             |
|       | 124           | (ATX-MS-1467 or ATX MS 1467).af.                                                                                 | 25             |
|       | 125           | (NG-01 or NG01 or "NG 01").af.                                                                                   | 148            |
|       | 126           | Xemys.af.                                                                                                        | 8              |
|       | 127           | (vafidemstat or oryzon or ORY-2001 or ORY2001 or ORY 2001).af.                                                   | 258            |
|       | 128           | (aldesleukin or Proleukin).af.                                                                                   | 1,973          |
|       | 129           | (Act-01 or Act01 or "Act 01").af.                                                                                | 36             |
|       | 130           | (SAR-441344 or SAR441344 or SAR 441344 or "INX 021" or INX-021 or INX021).af.                                    | 6              |
|       | 131           | (ibrigampar or AMG-131 or AMG131 or AMG 131 or CHS-131 or CHS131 or CHS 131 or INT-131 or INT131 or INT 131).af. | 104            |
|       | 132           | (RNS-60 or RNS60 or RNS 60).af.                                                                                  | 95             |
|       | 133           | (ATL-1102 or ATL1102 or ATL 1102).af.                                                                            | 55             |
|       | 134           | (GNbAC1 or temelimab).af.                                                                                        | 136            |
|       | 135           | (TZLS-401 or TZLS401 or TZLS 401 or foralumab).af.                                                               | 32             |
|       | 136           | (elezanumab or ABT-555 or ABT555 or ABT 555 or AE12-1Y-QL).af.                                                   | 42             |

| Facet | Search Number | Search String                                                             | Number of Hits |
|-------|---------------|---------------------------------------------------------------------------|----------------|
|       | 137           | (Vidofludimus or 4SC-101 or 4SC101 or 4SC 101 or SC12267).af.             | 115            |
|       | 138           | (ATA-190 or ATA190 or ATA 190).af.                                        | 2              |
|       | 139           | (telitacicept or RC18 or RC-18 or RC 18 or RCT-18 or RCT 18 or RCT18).af. | 259            |
|       | 140           | orelabrutinib.af.                                                         | 46             |
|       | 141           | (monomethyl fumarate or MMF or Bafiertam).af.                             | 21,911         |
|       | 142           | Octagam.af.                                                               | 515            |
|       | 143           | exp Evobrutinib/                                                          | 126            |
|       | 144           | Evobrutinib.af.                                                           | 201            |
|       | 145           | (PRN2246 or SAR442168 or Tolebrutinib).af.                                | 70             |
|       | 146           | exp Tolebrutinib/                                                         | 30             |
|       | 147           | (Fenebrutinib or GDC-0853).af.                                            | 180            |
|       | 148           | Orelabrutinib.af.                                                         | 46             |
|       | 149           | exp Orelabrutinib/                                                        | 35             |
|       | 150           | exp Fenebrutinib/                                                         | 99             |
|       | 151           | BIIB091.af.                                                               | 9              |
|       | 152           | (AC 0058TA or AC0058TA).af.                                               | 3              |
|       | 153           | BIIB068.af.                                                               | 3              |
|       | 154           | (Poseltinib or LY3337641 or HM71224).af.                                  | 39             |
|       | 155           | exp poseltinib/                                                           | 16             |
|       | 156           | exp Masitinib/                                                            | 626            |
|       | 157           | (Masitinib or AB 1010 or AB1010 or AB-1010).af.                           | 960            |
|       | 158           | exp IMATINIB/                                                             | 56,369         |
|       | 159           | (Imatinib or Glivec or STI571 or sti-571 or sti 571).af.                  | 66,227         |
|       | 160           | (MIQ-001 or MIQ001 or "MIQ 001").af.                                      | 3              |
|       | 161           | (GZ-402668 or GZ402668 or GZ 402668).af.                                  | 15             |
|       | 162           | (BCD-054 or BCD054 or "BCD 054").af.                                      | 10             |
|       | 163           | (CP-1050 or CP1050 or CP 1050).af.                                        | 28             |
|       | 164           | (TRK-560 or TRK560 or TRK 560).af.                                        | 6              |
|       | 165           | (rHIgM22 or M22 or sHIgM22).af.                                           | 1,306          |
|       | 166           | (RTL-1000 or RTL1000 or RTL 1000 or VG1000 or VG 1000 or VG-1000).af.     | 58             |
|       | 167           | (T-20-K or T20K).af.                                                      | 111            |
|       | 168           | (ZD-03 or ZD03 or "ZD 03").af.                                            | 62             |
|       | 169           | (AK-119 or AK119 or AK 119).af.                                           | 10             |
|       | 170           | (18F-3-F4AP or 18F*3F4AP).af.                                             | 2              |
|       | 171           | (PIPE-307 or PIPE307 or PIPE 307).af.                                     | 1              |
|       | 172           | (IMS-001 or IMS001 or "IMS 001").af.                                      | 1              |
|       | 173           | (IPG-1094 or IPG1094 or IPG 1094).af.                                     | 1              |
|       | 174           | (RO-7121932 or RO7121932 or RO 7121932).af.                               | 0              |
|       | 175           | (HuL-001 or HuL001 or "HuL 001").af.                                      | 1              |
|       | 176           | (Amilo-5MER or Amilo5MER or Amilo 5MER).af.                               | 2              |
|       | 177           | (CYMS-101 or CYMS101 or CYMS 101).af.                                     | 0              |
|       | 178           | (BMS-986196 or BMS986196 or BMS 986196 or 11C-BMS-986196).af.             | 1              |
|       | 179           | (BIIB-061 or BIIB061 or "BIIB 061").af.                                   | 3              |

| Facet                                                     | Search Number | Search String                                                               | Number of Hits |
|-----------------------------------------------------------|---------------|-----------------------------------------------------------------------------|----------------|
|                                                           | 180           | (GSK-3888130B or GSK3888130B or GSK 3888130B).af.                           | 1              |
|                                                           | 181           | (DNL-788 or DNL788 or DNL 788 or SAR443820).af.                             | 3              |
|                                                           | 182           | (DUOC-01 or DUOC01 or "DUOC 01").af.                                        | 31             |
|                                                           | 183           | (ZYIL-1 or ZYIL1 or ZYIL 1).af.                                             | 0              |
|                                                           | 184           | (BIIB-107 or BIIB107 or BIIB 107).af.                                       | 1              |
|                                                           | 185           | (ANK-700 or ANK700 or ANK 700).af.                                          | 1              |
|                                                           | 186           | (tolerogenic dendritic cell therapy or TOIDC or Tolerogenic dendritic*).af. | 1,983          |
|                                                           | 187           | exp ibudilast/                                                              | 689            |
|                                                           | 188           | exp dapirolizumab pegol/                                                    | 31             |
|                                                           | 189           | exp Remibrutinib/                                                           | 16             |
|                                                           | 190           | exp Biotin/                                                                 | 37,627         |
|                                                           | 191           | RPI 78M.af.                                                                 | 6              |
|                                                           | 192           | (Divozilimab or BCD-132).af.                                                | 7              |
|                                                           | 193           | CNM-Au8.af.                                                                 | 29             |
|                                                           | 194           | (AV-411 or MN-166 or Ibudilast).af.                                         | 1,033          |
|                                                           | 195           | (CDP7657 or dapirolizumab).af.                                              | 67             |
|                                                           | 196           | (LOU064 or Remibrutinib).af.                                                | 44             |
|                                                           | 197           | (MD1003 or Biotin or "Vitamin H").af.                                       | 75,094         |
|                                                           | 198           | andrographolide.af.                                                         | 3,372          |
|                                                           | 199           | or/121-198                                                                  | 176,037        |
|                                                           | 200           | 199 not 120                                                                 | 135,920        |
| <b>Combine (disease, study design, and interventions)</b> | 201           | 11 and 41 and 200                                                           | 240            |
| <b>Limit to English language, humans</b>                  | 202           | limit 201 to English language, humans                                       | 182            |
| <b>Final after removing duplicates</b>                    | 203           | remove duplicates from 202                                                  | 134            |

The total number of hits from database searches was 18,937 (18,803 + 134).

**Table A.3. Search strategy for hand-searching conference abstracts.**

| Search Number | Conference Name                      | Year | Link                                                                                                                                                                                                                                                                                                   | Search Terms                                    |
|---------------|--------------------------------------|------|--------------------------------------------------------------------------------------------------------------------------------------------------------------------------------------------------------------------------------------------------------------------------------------------------------|-------------------------------------------------|
| 1             | ACTRIMS                              | 2017 | <a href="https://journals.sagepub.com/toc/msja/23/1_suppl">https://journals.sagepub.com/toc/msja/23/1_suppl</a>                                                                                                                                                                                        | Whole pdf screened                              |
|               |                                      | 2018 | <a href="https://journals.sagepub.com/toc/msja/24/1_suppl%20">https://journals.sagepub.com/toc/msja/24/1_suppl%20</a>                                                                                                                                                                                  | Whole pdf screened                              |
|               |                                      | 2019 | <a href="https://journals.sagepub.com/toc/msja/25/1_suppl">https://journals.sagepub.com/toc/msja/25/1_suppl</a>                                                                                                                                                                                        | Whole pdf screened                              |
|               |                                      | 2020 | <a href="https://journals.sagepub.com/toc/msja/26/1_suppl">https://journals.sagepub.com/toc/msja/26/1_suppl</a>                                                                                                                                                                                        | Whole pdf screened                              |
|               | ACTRIMS and ECTRIMS joint conference | 2020 | <a href="https://journals.sagepub.com/toc/msja/26/3_suppl">https://journals.sagepub.com/toc/msja/26/3_suppl</a>                                                                                                                                                                                        | Whole pdf screened                              |
| 2             | ECTRIMS                              | 2017 | <a href="https://onlinelibrary.ectrims-congress.eu/ectrims/#!*menu=6*browseby=3*sortby=2">https://onlinelibrary.ectrims-congress.eu/ectrims/#!*menu=6*browseby=3*sortby=2</a><br><a href="https://journals.sagepub.com/toc/msja/23/3_suppl">https://journals.sagepub.com/toc/msja/23/3_suppl</a>       | Whole pdf screened                              |
|               |                                      | 2018 | <a href="https://journals.sagepub.com/toc/msja/24/2_suppl%20">https://journals.sagepub.com/toc/msja/24/2_suppl%20</a><br><a href="https://onlinelibrary.ectrims-congress.eu/ectrims/#!*menu=6*browseby=3*sortby=2">https://onlinelibrary.ectrims-congress.eu/ectrims/#!*menu=6*browseby=3*sortby=2</a> | Whole pdf screened                              |
|               |                                      | 2019 | <a href="https://journals.sagepub.com/toc/msja/25/2_suppl">https://journals.sagepub.com/toc/msja/25/2_suppl</a><br><a href="https://onlinelibrary.ectrims-congress.eu/ectrims/#!*menu=6*browseby=3*sortby=2">https://onlinelibrary.ectrims-congress.eu/ectrims/#!*menu=6*browseby=3*sortby=2</a>       | Whole pdf screened                              |
|               |                                      | 2021 | <a href="https://journals.sagepub.com/toc/msja/27/2_suppl">https://journals.sagepub.com/toc/msja/27/2_suppl</a>                                                                                                                                                                                        | Whole pdf screened                              |
|               |                                      |      |                                                                                                                                                                                                                                                                                                        |                                                 |
| 3             | AAN                                  | 2017 | <a href="https://n.neurology.org/content/88/16_Supplement">https://n.neurology.org/content/88/16_Supplement</a>                                                                                                                                                                                        | MS and General Neurology sections were searched |
|               |                                      | 2018 | <a href="https://n.neurology.org/content/90/15_Supplement">https://n.neurology.org/content/90/15_Supplement</a>                                                                                                                                                                                        | MS and General Neurology sections were searched |
|               |                                      | 2019 | <a href="https://n.neurology.org/content/92/15_Supplement">https://n.neurology.org/content/92/15_Supplement</a>                                                                                                                                                                                        | MS and General Neurology sections were searched |
|               |                                      | 2020 | <a href="https://n.neurology.org/content/94/15_Supplement">https://n.neurology.org/content/94/15_Supplement</a>                                                                                                                                                                                        | MS and General Neurology sections were searched |
|               |                                      | 2021 | <a href="https://n.neurology.org/content/96/15_Supplement">https://n.neurology.org/content/96/15_Supplement</a>                                                                                                                                                                                        | MS and General Neurology sections were searched |

| Search Number | Conference Name                    | Year       | Link                                                                                                                                                                                                                                                               | Search Terms                                             |
|---------------|------------------------------------|------------|--------------------------------------------------------------------------------------------------------------------------------------------------------------------------------------------------------------------------------------------------------------------|----------------------------------------------------------|
| 4             | EAN                                | 2017       | <a href="https://www.ean.org/Archive.2880.0.html">https://www.ean.org/Archive.2880.0.html</a>                                                                                                                                                                      | MS and Related Disorders section was searched in the pdf |
|               |                                    | 2018       | <a href="https://www.ean.org/Archive.2880.0.html">https://www.ean.org/Archive.2880.0.html</a>                                                                                                                                                                      | MS and Related Disorders section was searched in the pdf |
|               |                                    | 2019       | <a href="https://www.ean.org/oslo2019/Abstract-Book.3928.0.html">https://www.ean.org/oslo2019/Abstract-Book.3928.0.html</a>                                                                                                                                        | MS and Related Disorders section was searched in the pdf |
|               |                                    | 2020       | <a href="https://onlinelibrary.wiley.com/toc/14681331/2020/27/S1">https://onlinelibrary.wiley.com/toc/14681331/2020/27/S1</a>                                                                                                                                      | MS and Related Disorders section was searched in the pdf |
|               |                                    | 2021       | <a href="https://www.ean.org/congress-2021/present/abstracts/abstract-book">https://www.ean.org/congress-2021/present/abstracts/abstract-book</a>                                                                                                                  | Whole pdf screened                                       |
| 5             | CMSC                               | 2017       | <a href="https://cmsc.confex.com/cmsc/2017/webprogram/POSTER.html">https://cmsc.confex.com/cmsc/2017/webprogram/POSTER.html</a><br><a href="https://ijmsc.org/doi/pdf/10.7224/1537-2073-19.s1.1">https://ijmsc.org/doi/pdf/10.7224/1537-2073-19.s1.1</a>           | Whole pdf screened                                       |
|               |                                    | 2018       | <a href="https://cmsc.confex.com/cmsc/2018/webprogram/meeting.html">https://cmsc.confex.com/cmsc/2018/webprogram/meeting.html</a><br><a href="https://ijmsc.org/doi/pdf/10.7224/1537-2073-20.s1.1">https://ijmsc.org/doi/pdf/10.7224/1537-2073-20.s1.1</a>         | Whole pdf screened                                       |
|               |                                    | 2019       | <a href="https://cmsc.confex.com/cmsc/2019/meetingapp.cgi/Session/1209">https://cmsc.confex.com/cmsc/2019/meetingapp.cgi/Session/1209</a><br><a href="https://ijmsc.org/doi/pdf/10.7224/1537-2073-21.s1.1">https://ijmsc.org/doi/pdf/10.7224/1537-2073-21.s1.1</a> | Whole pdf screened                                       |
|               |                                    | 2020       | <a href="https://meridian.allenpress.com/ijmsc/issue/22/s2">https://meridian.allenpress.com/ijmsc/issue/22/s2</a>                                                                                                                                                  | Whole pdf screened                                       |
|               |                                    | 2021       | <a href="https://meridian.allenpress.com/ijmsc/article/23/s2/i/472175/Abstracts-from-the-35th-Annual-Meeting-of-the">https://meridian.allenpress.com/ijmsc/article/23/s2/i/472175/Abstracts-from-the-35th-Annual-Meeting-of-the</a>                                | Whole pdf screened                                       |
| 6             | International MS Cognition Society | 2017       | <a href="https://journals.sagepub.com/toc/msja/23/8">https://journals.sagepub.com/toc/msja/23/8</a>                                                                                                                                                                | Whole pdf screened                                       |
|               |                                    | 2018       | <a href="https://www.imscogs.com/imscogs/conferences/conference-2018-berlin/scientific-programme.html">https://www.imscogs.com/imscogs/conferences/conference-2018-berlin/scientific-programme.html</a>                                                            | Whole pdf screened                                       |
|               |                                    | 2019       | <a href="https://journals.sagepub.com/toc/msja/25/8">https://journals.sagepub.com/toc/msja/25/8</a>                                                                                                                                                                | Whole pdf screened                                       |
|               |                                    | 2020, 2021 | <a href="https://www.imscogs.com/conferences/conference-2020-bordeaux.html">https://www.imscogs.com/conferences/conference-2020-bordeaux.html</a>                                                                                                                  | Event cancelled                                          |

AAN American Academy of Neurology, *ACTRIMS* Americas Committee for Treatment and Research in Multiple Sclerosis, *CMSC* Consortium of Multiple Sclerosis Centers, *EAN* European Academy of Neurology, *ECTRIMS* European Committee for Treatment and Research in Multiple Sclerosis.

**Table A.4. Search strategy for ongoing, terminated, and suspended studies from ClinicalTrials.gov.**

| Website: <a href="https://clinicaltrials.gov/ct2/search/advanced?cond=&amp;term=&amp;cntry=&amp;state=&amp;city=&amp;dist=">https://clinicaltrials.gov/ct2/search/advanced?cond=&amp;term=&amp;cntry=&amp;state=&amp;city=&amp;dist=</a> |                                     |                                                          |                                                        |                                                 |
|------------------------------------------------------------------------------------------------------------------------------------------------------------------------------------------------------------------------------------------|-------------------------------------|----------------------------------------------------------|--------------------------------------------------------|-------------------------------------------------|
| Filters:                                                                                                                                                                                                                                 |                                     |                                                          |                                                        |                                                 |
| Disease: Multiple sclerosis                                                                                                                                                                                                              |                                     |                                                          |                                                        |                                                 |
| Age Group: Adults (18-64), Older Adult (65+)                                                                                                                                                                                             |                                     |                                                          |                                                        |                                                 |
| Study Type: Interventional (Clinical Trial)                                                                                                                                                                                              |                                     |                                                          |                                                        |                                                 |
| Search Terms (Intervention)                                                                                                                                                                                                              | Initial Search on November 19, 2019 | Additional Search from January 1, 2020 to March 25, 2021 | Additional Search from April 1, 2021 to March 31, 2022 | Remarks                                         |
| Interferon beta-1b                                                                                                                                                                                                                       | 48                                  | 4                                                        | 1                                                      | Also searched for Betaseron, Betaferon, Extavia |
| Interferon beta-1a                                                                                                                                                                                                                       | 131                                 | 12                                                       | 3                                                      | Also searched for Rebif and Avonex              |
| IFN                                                                                                                                                                                                                                      | 171                                 | 17                                                       | 6                                                      | Also searched for Interferon and Multi          |
| Peginterferon beta-1a                                                                                                                                                                                                                    | 17                                  | 4                                                        | 2                                                      | Also searched for Interferon                    |
| Glatiramer                                                                                                                                                                                                                               | 68                                  | 10                                                       | 3                                                      |                                                 |
| Copaxone                                                                                                                                                                                                                                 | 10                                  | 10                                                       | 3                                                      |                                                 |
| Fingolimod                                                                                                                                                                                                                               | 52                                  | 7                                                        | 0                                                      | Also searched for Gilenya, FTY 720, and Multi   |
| Natalizumab                                                                                                                                                                                                                              | 53                                  | 11                                                       | 2                                                      | Also searched for Tysabri                       |
| Teriflunomide                                                                                                                                                                                                                            | 39                                  | 17                                                       | 4                                                      | Also searched for Aubagio, HMR1726, and Multi   |
| Alemtuzumab                                                                                                                                                                                                                              | 24                                  | 4                                                        | 1                                                      | Also searched for Lemtrada and Campath          |
| Dimethyl fumarate                                                                                                                                                                                                                        | 50                                  | 11                                                       | 2                                                      | Also searched for Tecfidera and BG 00012        |
| Mitoxantrone                                                                                                                                                                                                                             | 9                                   | 5                                                        | 0                                                      |                                                 |
| Ocrelizumab                                                                                                                                                                                                                              | 22                                  | 34                                                       | 7                                                      | Also searched for Ocrevus                       |
| Siponimod                                                                                                                                                                                                                                | 3                                   | 4                                                        | 2                                                      | Also searched for BAF132                        |
| Cladribine                                                                                                                                                                                                                               | 11                                  | 12                                                       | 1                                                      |                                                 |
| ATX-MS-1467                                                                                                                                                                                                                              | 2                                   | 0                                                        | 0                                                      |                                                 |
| ALKS 8700                                                                                                                                                                                                                                | 3                                   | 1                                                        | 1                                                      |                                                 |
| Diroximel fumarate                                                                                                                                                                                                                       | 0                                   | 1                                                        | 3                                                      |                                                 |
| Vumerity                                                                                                                                                                                                                                 | 0                                   | 1                                                        | 2                                                      |                                                 |
| BIIB098                                                                                                                                                                                                                                  | 0                                   | 0                                                        | 1                                                      |                                                 |
| Ofatumumab                                                                                                                                                                                                                               | 7                                   | 7                                                        | 5                                                      |                                                 |
| Ozanimod                                                                                                                                                                                                                                 | 6                                   | 3                                                        | 1                                                      | Also searched for RPC1063                       |
| Ponesimod                                                                                                                                                                                                                                | 5                                   | 3                                                        | 0                                                      |                                                 |
| Ublituximab                                                                                                                                                                                                                              | 5                                   | 2                                                        | 0                                                      | Also searched for TG1101                        |
| Rituximab                                                                                                                                                                                                                                | 21                                  | 12                                                       | 2                                                      | Also searched for Mabthera and Rituxan          |
| Laquinimod                                                                                                                                                                                                                               | 10                                  | 5                                                        | 0                                                      |                                                 |
| <b>Total hits</b>                                                                                                                                                                                                                        | <b>767</b>                          | <b>197</b>                                               | <b>52</b>                                              |                                                 |

**Table A.5. Search strategy for ongoing, terminated, and suspended studies from the European Union Drug Regulating Authorities Clinical Trials Database.**

| Website: <a href="https://www.clinicaltrialsregister.eu/ctr-search/search">https://www.clinicaltrialsregister.eu/ctr-search/search</a>                                                                                                                                                                                                                                                                                                                                                                                                                                                                                                                                                                                                            |                    |                   |                                   |                                 |
|---------------------------------------------------------------------------------------------------------------------------------------------------------------------------------------------------------------------------------------------------------------------------------------------------------------------------------------------------------------------------------------------------------------------------------------------------------------------------------------------------------------------------------------------------------------------------------------------------------------------------------------------------------------------------------------------------------------------------------------------------|--------------------|-------------------|-----------------------------------|---------------------------------|
| Search Terms                                                                                                                                                                                                                                                                                                                                                                                                                                                                                                                                                                                                                                                                                                                                      | Population         | Hits Retrieved    |                                   |                                 |
|                                                                                                                                                                                                                                                                                                                                                                                                                                                                                                                                                                                                                                                                                                                                                   |                    | November 26, 2019 | January 1, 2020 to March 25, 2021 | April 1, 2021 to March 31, 2022 |
| ("Multiple sclerosis") AND (("Interferon-beta 1b") OR ("IFN beta-1b") OR ("Interferon") OR ("Betaseron") OR ("FTY 720") OR ("BG-00012") OR ("Campath") OR ("DMT") OR ("disease modifying therapy") OR ("Extavia") OR ("IFN") OR ("Interferon-beta 1a") OR ("IFN beta-1a") OR ("Rebif") OR ("Avonex") OR ("Peginterferon beta-1a") OR ("Plegridy") OR ("Glatiramer acetate") OR ("GA") OR ("Copaxone") OR ("Brabio") OR ("Fingolimod") OR ("Gilenya") OR ("Natalizumab") OR ("Tysabri") OR ("Teriflunomide") OR ("Aubagio") OR ("HMR1726") OR ("Alemtuzumab") OR ("Lemtrada") OR ("Dimethyl fumarate") OR ("Tecfidera") OR ("Mitoxantrone") OR ("Novantrone") OR ("Ocrelizumab") OR ("Ocrevus") OR ("Siponimod") OR ("Mayzent") OR ("Cladribine")) | Adults and Elderly | 272               | 30                                | 31                              |
| Multiple sclerosis AND (Ofatumumab OR Ozanimod OR Ponesimod OR Ublituximab OR Laquinimod OR Rituximab)                                                                                                                                                                                                                                                                                                                                                                                                                                                                                                                                                                                                                                            | Adults and Elderly | 41                | 5                                 | 6                               |
| Multiple sclerosis AND ("ALKS 8700" OR "Diroximel fumerate" OR "ATX-MS-1467")                                                                                                                                                                                                                                                                                                                                                                                                                                                                                                                                                                                                                                                                     | Adults and Elderly | 3                 | 0                                 | 0                               |
| <b>Total trials retrieved</b>                                                                                                                                                                                                                                                                                                                                                                                                                                                                                                                                                                                                                                                                                                                     |                    | <b>316</b>        | <b>35</b>                         | <b>37</b>                       |

**Table A.6. Search strategy for ongoing, terminated, and suspended studies from the International Clinical Trials Registry Platform.**

| Search Terms                                                                                                                                                                                                                        | Hits Retrieved    |                                   |                                 |
|-------------------------------------------------------------------------------------------------------------------------------------------------------------------------------------------------------------------------------------|-------------------|-----------------------------------|---------------------------------|
|                                                                                                                                                                                                                                     | December 12, 2019 | January 1, 2020 to March 25, 2021 | April 1, 2021 to March 31, 2022 |
| ("Multiple sclerosis") AND (("Interferon-beta 1b") OR ("IFN beta-1b") OR ("Interferon") OR "Betaseron" OR ("FTY 720") OR ("BG-00012") OR "Campath")                                                                                 | 237               | 19                                | 2                               |
| ("Multiple sclerosis") AND ("DMT" OR "Extavia" OR "IFN" OR ("Interferon-beta 1a") OR ("IFN beta-1a") OR "Rebif" OR "Avonex" OR ("Peginterferon beta-1a") OR "Plegridy" OR ("Glatiramer acetate") OR "GA" OR "Copaxone" OR "Brabio") | 467               | 96                                | 3                               |
| ("Multiple sclerosis") AND ("Fingolimod" OR "Gilenya" OR "Natalizumab" OR "Tysabri" OR "Teriflunomide" OR "Aubagio" OR ("HMR1726") OR "Alemtuzumab" OR "Lemtrada" OR ("Dimethyl fumarate"))                                         | 235               | 57                                | 12                              |
| ("Multiple sclerosis") AND ("Tecfidera") OR ("Mitoxantrone") OR ("Novantrone") OR ("Ocrelizumab") OR ("Ocrevus") OR ("Siponimod") OR ("Mayzent") OR ("Cladribine"))                                                                 | 106               | 64                                | 20                              |
| ("Multiple sclerosis") AND ("ATX-MS-1467" OR "ALKS 8700" OR "Diroximel fumerate" OR "Ofatumumab" OR "Ozanimod" OR "Ponesimod" OR "Ublituximab" OR "rituximab" OR "Laquinimod")                                                      | 85                | 19                                | 4                               |
| <b>Total hits</b>                                                                                                                                                                                                                   | <b>1130</b>       | <b>255</b>                        | <b>41</b>                       |

**Table A.7. Eligibility criteria for the systematic review.**

| Category      | Inclusion Criteria                                                                                                                                                                                                                                                                                                                                                                                                                                                                      | Exclusion Criteria                                                                                                                        |
|---------------|-----------------------------------------------------------------------------------------------------------------------------------------------------------------------------------------------------------------------------------------------------------------------------------------------------------------------------------------------------------------------------------------------------------------------------------------------------------------------------------------|-------------------------------------------------------------------------------------------------------------------------------------------|
| Population    | <ul style="list-style-type: none"> <li>Adults (<math>\geq 18</math> years)</li> <li>People with RMS (RRMS or SPMS with superimposed relapses)</li> </ul>                                                                                                                                                                                                                                                                                                                                | <ul style="list-style-type: none"> <li>People with MS types other than RMS (CIS, PPMS, and SPMS without superimposed relapses)</li> </ul> |
| Interventions | <ul style="list-style-type: none"> <li>Alemtuzumab</li> <li>Cladribine</li> <li>Dimethyl fumarate</li> <li>Diroximel fumarate</li> <li>Fingolimod</li> <li>Glatiramer acetate</li> <li>Interferon-beta 1a</li> <li>Interferon-beta 1b</li> <li>Mitoxantrone</li> <li>Natalizumab</li> <li>Ocrelizumab</li> <li>Ofatumumab</li> <li>Ozanimod</li> <li>Pegylated interferon beta-1a</li> <li>Ponesimod</li> <li>Siponimod</li> <li>Teriflunomide</li> <li>Unlicensed therapies</li> </ul> | <ul style="list-style-type: none"> <li>Studies assessing only unlicensed doses of approved DMTs</li> </ul>                                |
| Comparators   | <ul style="list-style-type: none"> <li>Any of the DMTs specified in Interventions</li> <li>Placebo</li> <li>Best supportive care</li> </ul>                                                                                                                                                                                                                                                                                                                                             |                                                                                                                                           |
| Outcomes      | <ul style="list-style-type: none"> <li>3-month confirmed disability progression</li> <li>6-month confirmed disability progression</li> <li>Annualised relapse rate</li> <li>Proportion with relapse/relapse-free</li> <li>MRI outcomes</li> <li>Quality of life outcomes</li> <li>Adverse events</li> <li>Serious adverse events</li> <li>Withdrawals</li> </ul>                                                                                                                        |                                                                                                                                           |
| Study Design  | <ul style="list-style-type: none"> <li>RCTs regardless of blinding status</li> <li>Any country</li> <li>English language only</li> </ul>                                                                                                                                                                                                                                                                                                                                                | <ul style="list-style-type: none"> <li>Any study design other than RCT</li> <li>Studies published in non-English languages</li> </ul>     |

Note: Limiting the population to people specifically with RRMS (as opposed to RMS) was not considered as it would result in the exclusion of key trials for IFNB-1a IM, IFNB-1a SC, ocrelizumab, ofatumumab, ozanimod, ponesimod, teriflunomide, and ublituximab.

Note: Unlicensed therapies considered as interventions were ACT-01, aldesleukin, ATA-190, ATL-1102, ATX-MS-1467, dapirolizumab pegol, divozilimab, elezanumab, evobrutinib, fenebrutinib, ibrigampar, ibudilast, imatinib, imilecleucel-t, INV-103, IR-902, laquinimod, masitinib, monomethyl fumarate, NG-01, Octagam, orelabrutinib, poseltinib, remibrutinib, rituximab, RNS-60, SAR-441344, telitacicept, temelimab, tolebrutinib, ublituximab, vafidemstat, vidofludimus, and Xemys.

CIS clinically isolated syndrome, DMT disease-modifying therapy, IFNB interferon beta, IM intramuscular, MRI magnetic resonance imaging, MS multiple sclerosis, PPMS primary progressive multiple sclerosis, RCT randomised controlled trial, RMS relapsing multiple sclerosis, RRMS relapsing-remitting multiple sclerosis, SC subcutaneous, SPMS secondary progressive multiple sclerosis.

**Table A.8. Relevant interventions for the network meta-analysis.**

| Interventions                                                                                                                                                                                                                                                                                                                                                                                                                                                                                                                                                                                                                                           |
|---------------------------------------------------------------------------------------------------------------------------------------------------------------------------------------------------------------------------------------------------------------------------------------------------------------------------------------------------------------------------------------------------------------------------------------------------------------------------------------------------------------------------------------------------------------------------------------------------------------------------------------------------------|
| <ul style="list-style-type: none"><li>• Alemtuzumab (12 mg)</li><li>• Cladribine (3.5 mg/kg)</li><li>• Dimethyl fumarate (240 mg BID)</li><li>• Fingolimod (0.5 mg)</li><li>• Glatiramer acetate (20 mg QD or 40 mg TIW)</li><li>• Interferon beta-1a IM (30 µg)</li><li>• Interferon beta-1a SC (22 µg TIW or 44 µg TIW)</li><li>• Interferon beta-1b (250 µg)</li><li>• Natalizumab (300 mg)</li><li>• Ocrelizumab (600 mg)</li><li>• Ofatumumab (20 mg)</li><li>• Ozanimod (1.0 mg)</li><li>• Ponesimod (20 mg)</li><li>• Pegylated interferon beta-1a (125 µg Q2W)</li><li>• Teriflunomide (7 mg or 14 mg)</li><li>• Ublituximab (450 mg)</li></ul> |

Note: Interventions were considered relevant if they were approved for RMS by the FDA and/or EMA as of June 2022 or were under review by the FDA and/or EMA at this time. Drugs were included irrespective of their brand/generic name.

*BID* twice a day, *EMA* European Medicines Agency, *FDA* United States Food and Drug Administration, *IM* intramuscular, *Q2W* once every two weeks, *QD* once a day, *SC* subcutaneous, *TIW* three times a week.

**Table A.9. List of trials included in the network meta-analysis.**

| Trial Name               | Pivotal Publication Author (Year)        | NCT Number    | Relevant Treatments                                                                                                                                       |
|--------------------------|------------------------------------------|---------------|-----------------------------------------------------------------------------------------------------------------------------------------------------------|
| ADVANCE                  | Calabresi (2014) [1]                     | NCT00906399   | <ul style="list-style-type: none"> <li>• Pegylated interferon beta-1a SC 125 µg Q2W</li> <li>• Placebo</li> </ul>                                         |
| AFFIRM                   | Polman (2006) [2]                        | NCT00027300   | <ul style="list-style-type: none"> <li>• Natalizumab IV 300 mg Q4W</li> <li>• Placebo</li> </ul>                                                          |
| ASCLEPIOS I              | Hauser (2020) [3]                        | NCT02792218   | <ul style="list-style-type: none"> <li>• Ofatumumab SC 20 mg Q4W</li> <li>• Teriflunomide PO 14 mg QD</li> </ul>                                          |
| ASCLEPIOS II             | Hauser (2020) [3]                        | NCT02792231   | <ul style="list-style-type: none"> <li>• Ofatumumab SC 20 mg Q4W</li> <li>• Teriflunomide PO 14 mg QD</li> </ul>                                          |
| ASSESS                   | Cree (2021) [4]                          | NCT01633112   | <ul style="list-style-type: none"> <li>• Fingolimod PO 0.5 mg QD</li> <li>• Glatiramer acetate SC 20 mg QD</li> </ul>                                     |
| BEYOND                   | O'Connor (2009) [5]                      | NCT00099502   | <ul style="list-style-type: none"> <li>• IFNB-1b SC 250 µg Q2D</li> <li>• Glatiramer acetate SC 20 mg QD</li> </ul>                                       |
| Boiko et al. (2018)      | Boiko (2018) [6]                         | NCT02753088   | <ul style="list-style-type: none"> <li>• Glatiramer acetate SC 20 mg QD</li> <li>• Glatiramer acetate SC 20 mg QD (Timexon)</li> <li>• Placebo</li> </ul> |
| Bornstein et al. (1987)  | Bornstein (1987) [7]                     | Not available | <ul style="list-style-type: none"> <li>• Glatiramer acetate SC 20 mg QD</li> <li>• Placebo</li> </ul>                                                     |
| BRAVO                    | Vollmer (2014) [8]                       | NCT00605215   | <ul style="list-style-type: none"> <li>• IFNB-1a IM 30 µg QW</li> <li>• Placebo</li> </ul>                                                                |
| Calabrese et al. (2012)  | Calabrese (2012) [9]                     | Not available | <ul style="list-style-type: none"> <li>• IFNB-1a SC 44 µg TIW</li> <li>• IFNB-1a IM 30 µg QW</li> <li>• Glatiramer acetate SC 20 mg QD</li> </ul>         |
| CAMMS223                 | CAMMS223 Trial Investigators (2008) [10] | NCT00050778   | <ul style="list-style-type: none"> <li>• Alemtuzumab IV 12 mg (1 course every 12 months)</li> <li>• IFNB-1a SC 44 µg TIW</li> </ul>                       |
| CARE-MS I                | Cohen (2012) [11]                        | NCT00530348   | <ul style="list-style-type: none"> <li>• Alemtuzumab IV 12 mg (1 course every 12 months)</li> <li>• IFNB-1a SC 44 µg TIW</li> </ul>                       |
| CARE-MS II               | Coles (2012) [12]                        | NCT00548405   | <ul style="list-style-type: none"> <li>• Alemtuzumab IV 12 mg (1 course every 12 months)</li> <li>• IFNB-1a SC 44 µg TIW</li> </ul>                       |
| CLARITY                  | Giovannoni (2010) [13]                   | NCT00213135   | <ul style="list-style-type: none"> <li>• Cladribine PO 3.5 mg/kg (2 courses over 2 years)</li> <li>• Placebo</li> </ul>                                   |
| CombiRx                  | Lublin (2013) [14]                       | NCT00211887   | <ul style="list-style-type: none"> <li>• IFNB-1a IM 30 µg QW</li> <li>• Glatiramer acetate SC 20 mg QD</li> </ul>                                         |
| CONFIRM                  | Fox (2012) [15]                          | NCT00451451   | <ul style="list-style-type: none"> <li>• Dimethyl fumarate PO 240 mg BID</li> <li>• Glatiramer acetate SC 20 mg QD</li> <li>• Placebo</li> </ul>          |
| Copolymer 1 MS trial     | Johnson (1995) [16]                      | Not available | <ul style="list-style-type: none"> <li>• Glatiramer acetate SC 20 mg QD</li> <li>• Placebo</li> </ul>                                                     |
| DEFINE                   | Gold (2012) [17]                         | NCT00420212   | <ul style="list-style-type: none"> <li>• Dimethyl fumarate PO 240 mg BID</li> <li>• Placebo</li> </ul>                                                    |
| Etemadifar et al. (2006) | Etemadifar (2006) [18]                   | Not available | <ul style="list-style-type: none"> <li>• IFNB-1a SC 44 µg TIW</li> <li>• IFNB-1a IM 30 µg QW</li> <li>• IFNB-1b SC 250 µg Q2D</li> </ul>                  |
| EVIDENCE                 | Panitch (2002) [19]                      | Not available | <ul style="list-style-type: none"> <li>• IFNB-1a SC 44 µg TIW</li> <li>• IFNB-1a IM 30 µg QW</li> </ul>                                                   |
| FREEDOMS                 | Kappos (2010) [20]                       | NCT00289978   | <ul style="list-style-type: none"> <li>• Fingolimod PO 0.5 mg QD</li> <li>• Placebo</li> </ul>                                                            |
| FREEDOMS II              | Calabresi (2014) [21]                    | NCT00355134   | <ul style="list-style-type: none"> <li>• Fingolimod PO 0.5 mg QD</li> <li>• Placebo</li> </ul>                                                            |
| GALA                     | Khan (2013) [22]                         | NCT01067521   | <ul style="list-style-type: none"> <li>• Glatiramer acetate SC 40 mg TIW</li> <li>• Placebo</li> </ul>                                                    |
| GOLDEN                   | Comi (2017) [23]                         | NCT01333501   | <ul style="list-style-type: none"> <li>• Fingolimod 0.5 mg PO QD</li> <li>• IFNB-1b SC 250 µg Q2D</li> </ul>                                              |

| Trial Name            | Pivotal Publication Author (Year)               | NCT Number    | Relevant Treatments                                                                                                                               |
|-----------------------|-------------------------------------------------|---------------|---------------------------------------------------------------------------------------------------------------------------------------------------|
| IFNB MS               | IFNB Multiple Sclerosis Study Group (1993) [24] | Not available | <ul style="list-style-type: none"> <li>• IFNB-1b SC 250 µg Q2D</li> <li>• Placebo</li> </ul>                                                      |
| INCOMIN               | Durelli (2002) [25]                             | Not available | <ul style="list-style-type: none"> <li>• IFNB-1a IM 30 µg QW</li> <li>• IFNB-1b SC 250 µg Q2D</li> </ul>                                          |
| MSCRG                 | Jacobs (1996) [26]                              | Not available | <ul style="list-style-type: none"> <li>• IFNB-1a IM 30 µg QW</li> <li>• Placebo</li> </ul>                                                        |
| OPERA I               | Hauser (2017) [27]                              | NCT01247324   | <ul style="list-style-type: none"> <li>• Ocrelizumab IV 600 mg Q24W</li> <li>• IFNB-1a SC 44 µg TIW</li> </ul>                                    |
| OPERA II              | Hauser (2017) [27]                              | NCT01412333   | <ul style="list-style-type: none"> <li>• Ocrelizumab IV 600 mg Q24W</li> <li>• IFNB-1a SC 44 µg TIW</li> </ul>                                    |
| OPTIMUM               | Kappos (2021) [28]                              | NCT02425644   | <ul style="list-style-type: none"> <li>• Ponesimod PO 20 mg QD</li> <li>• Teriflunomide PO 14 mg QD</li> </ul>                                    |
| PRISMS                | Ebers (1998) [29]                               | Not available | <ul style="list-style-type: none"> <li>• IFNB-1a SC 22 µg TIW</li> <li>• IFNB-1a SC 44 µg TIW</li> <li>• Placebo</li> </ul>                       |
| RADIANCE-B            | Cohen (2019) [30]                               | NCT02047734   | <ul style="list-style-type: none"> <li>• Ozanimod PO 1.0 mg QD</li> <li>• IFNB-1a IM 30 µg QW</li> </ul>                                          |
| REGARD                | Mikol (2008) [31]                               | NCT00078338   | <ul style="list-style-type: none"> <li>• IFNB-1a SC 44 µg TIW</li> <li>• Glatiramer acetate SC 20 mg QD</li> </ul>                                |
| Stepien et al. (2013) | Stepien (2013) [32]                             | Not available | <ul style="list-style-type: none"> <li>• IFNB-1a IM 30 µg QW</li> <li>• IFNB-1b SC 250 µg Q2D</li> </ul>                                          |
| SUNBEAM               | Comi (2019) [33]                                | NCT02294058   | <ul style="list-style-type: none"> <li>• Ozanimod PO 1.0 mg QD</li> <li>• IFNB-1a IM 30 µg QW</li> </ul>                                          |
| TEMPO                 | O'Connor (2011) [34]                            | NCT00134563   | <ul style="list-style-type: none"> <li>• Teriflunomide PO 7 mg QD</li> <li>• Teriflunomide PO 14 mg QD</li> <li>• Placebo</li> </ul>              |
| TENERE                | Vermersch (2014) [35]                           | NCT00883337   | <ul style="list-style-type: none"> <li>• Teriflunomide PO 7 mg QD</li> <li>• Teriflunomide PO 14 mg QD</li> <li>• IFNB-1a SC 44 µg TIW</li> </ul> |
| TOWER                 | Confavreux (2014) [36]                          | NCT00751881   | <ul style="list-style-type: none"> <li>• Teriflunomide PO 7 mg QD</li> <li>• Teriflunomide PO 14 mg QD</li> <li>• Placebo</li> </ul>              |
| TRANSFORMS            | Cohen (2010) [37]                               | NCT00340834   | <ul style="list-style-type: none"> <li>• Fingolimod PO 0.5 mg QD</li> <li>• IFNB-1a IM 30 µg QW</li> </ul>                                        |
| ULTIMATE I            | Steinman (2022) [38, 39]                        | NCT03277261   | <ul style="list-style-type: none"> <li>• Teriflunomide PO 14 mg QD</li> <li>• Ublituximab IV 450 mg Q24W</li> </ul>                               |
| ULTIMATE II           | Steinman (2022) [38, 39]                        | NCT03277248   | <ul style="list-style-type: none"> <li>• Teriflunomide PO 14 mg QD</li> <li>• Ublituximab IV 450 mg Q24W</li> </ul>                               |

Note: Some trials included additional treatment arms not listed here that were outside of the scope of the eligibility criteria for this study.

*BID* twice a day, *IFNB* interferon beta, *IM* intramuscular, *IV* intravenous, *PO* oral, *Q24W* once every 24 weeks, *Q2D* once every other day, *Q2W* once every two weeks, *Q4W* once every four weeks, *QD* once a day, *QW* once a week, *SC* subcutaneous, *TIW* three times a week.

**Table A.10. Risk of bias assessment results for included trials.**

| Trial Name               | A        | B         | C         | D         | E        | F        | G         |
|--------------------------|----------|-----------|-----------|-----------|----------|----------|-----------|
| ADVANCE                  | Low risk | Low risk  | Low risk  | Low risk  | Low risk | Low risk | Low risk  |
| AFFIRM                   | Low risk | Low risk  | Low risk  | Low risk  | Low risk | Low risk | Low risk  |
| ASCLEPIOS I              | Low risk | Low risk  | Low risk  | Low risk  | Low risk | Low risk | Low risk  |
| ASCLEPIOS II             | Low risk | Low risk  | Low risk  | Low risk  | Low risk | Low risk | Low risk  |
| ASSESS                   | Low risk | High risk | Low risk  | High risk | Low risk | Low risk | Low risk  |
| BEYOND                   | Low risk | Low risk  | Low risk  | Low risk  | Low risk | Low risk | High risk |
| Boiko et al. (2018)      | Unclear  | Unclear   | Low risk  | Low risk  | Low risk | Low risk | Low risk  |
| Bornstein et al. (1987)  | Unclear  | Unclear   | Low risk  | Low risk  | Unclear  | Low risk | Low risk  |
| BRAVO                    | Low risk | Low risk  | High risk | Low risk  | Low risk | Low risk | Low risk  |
| Calabrese et al. (2012)  | Low risk | Unclear   | Unclear   | Unclear   | Unclear  | Low risk | Unclear   |
| CAMMS223                 | Low risk | Unclear   | Low risk  | High risk | Low risk | Low risk | Low risk  |
| CARE-MS I                | Low risk | High risk | Low risk  | High risk | Low risk | Low risk | Low risk  |
| CARE-MS II               | Low risk | High risk | Low risk  | High risk | Low risk | Low risk | Low risk  |
| CLARITY                  | Low risk | Low risk  | Low risk  | Low risk  | Low risk | Low risk | Low risk  |
| CombiRx                  | Low risk | Unclear   | High risk | Low risk  | Low risk | Low risk | Low risk  |
| CONFIRM                  | Low risk | Low risk  | Low risk  | Low risk  | Low risk | Low risk | Low risk  |
| Copolymer 1 MS trial     | Unclear  | Unclear   | Low risk  | Low risk  | Low risk | Low risk | Low risk  |
| DEFINE                   | Low risk | Low risk  | Low risk  | Low risk  | Low risk | Low risk | Low risk  |
| Etemadifar et al. (2006) | Low risk | Unclear   | Low risk  | Low risk  | Unclear  | Low risk | Low risk  |
| EVIDENCE                 | Low risk | Unclear   | Unclear   | Unclear   | Low risk | Low risk | Low risk  |
| FREEDOMS                 | Low risk | Low risk  | Low risk  | Low risk  | Low risk | Low risk | Low risk  |
| FREEDOMS II              | Low risk | Low risk  | Low risk  | Low risk  | Low risk | Low risk | Low risk  |
| GALA                     | Low risk | Low risk  | Low risk  | Low risk  | Low risk | Low risk | Low risk  |
| GOLDEN                   | Low risk | High risk | Low risk  | High risk | Low risk | Low risk | Low risk  |
| IFNB MS                  | Low risk | Low risk  | Low risk  | Low risk  | Low risk | Low risk | Low risk  |
| INCOMIN                  | Low risk | Low risk  | Low risk  | High risk | Low risk | Low risk | Low risk  |
| MSCRG                    | Low risk | Low risk  | Low risk  | Low risk  | Unclear  | Low risk | Low risk  |
| OPERA I                  | Low risk | Low risk  | Low risk  | Low risk  | Low risk | Low risk | Low risk  |
| OPERA II                 | Low risk | Low risk  | Low risk  | Low risk  | Low risk | Low risk | Low risk  |
| OPTIMUM                  | Low risk | Low risk  | Low risk  | Low risk  | Low risk | Low risk | Low risk  |
| PRISMS                   | Low risk | Low risk  | Low risk  | Low risk  | Low risk | Low risk | Low risk  |
| RADIANCE-B               | Low risk | Low risk  | Low risk  | Low risk  | Low risk | Low risk | Low risk  |
| REGARD                   | Low risk | Low risk  | Low risk  | High risk | Low risk | Low risk | Low risk  |
| Stepien et al. (2013)    | Unclear  | Unclear   | Low risk  | High risk | Unclear  | Low risk | Unclear   |
| SUNBEAM                  | Low risk | Low risk  | Low risk  | Low risk  | Low risk | Low risk | Low risk  |
| TEMPO                    | Unclear  | Unclear   | Low risk  | Low risk  | Low risk | Low risk | Low risk  |
| TENERE                   | Unclear  | Unclear   | Low risk  | Low risk  | Low risk | Low risk | Low risk  |
| TOWER                    | Low risk | Low risk  | Low risk  | Low risk  | Low risk | Low risk | Low risk  |
| TRANSFORMS               | Low risk | Low risk  | Low risk  | Low risk  | Low risk | Low risk | Low risk  |
| ULTIMATE I               | Low risk | Low risk  | Low risk  | Low risk  | Low risk | Low risk | Low risk  |
| ULTIMATE II              | Low risk | Low risk  | Low risk  | Low risk  | Low risk | Low risk | Low risk  |

Risk of Bias Questions: A: Was randomization carried out appropriately?; B: Was the concealment of treatment allocation adequate?; C: Were the groups similar at the outset of the study in terms of prognostic factors, for example, severity of disease?; D: Were the care providers, participants and outcome assessors blind to treatment allocation? If any of these people were not blinded, what might be the likely impact on the risk of bias (for each outcome)?; E: Were there any unexpected imbalances in drop-outs between groups? If so, were they explained or adjusted for?; F: Is there any evidence to suggest that the authors measured more outcomes than they reported?; G: Did the analysis include an intention-to-treat analysis? If so, was this appropriate and were appropriate methods used to account for missing data?

NA not available.

**Table A.11. List of trials excluded from the network meta-analysis.**

| Trial Name                      | Reason for Exclusion                                       |
|---------------------------------|------------------------------------------------------------|
| ALLEGRO [40]                    | Intervention not of interest                               |
| APEX [41]                       | Study duration <48 weeks                                   |
| APOLITOS [42]                   | Study duration <48 weeks                                   |
| ASCEND [43]                     | Population not of interest (SPMS)                          |
| Barbero et al. (2004) [44]      | Not RCT                                                    |
| Bastianello et al. (1994) [45]  | Intervention not of interest                               |
| BCD-054 [46]                    | Study duration <48 weeks                                   |
| BECOME [47]                     | Includes patients with CIS                                 |
| Boiko et al. (2018) [48]        | Did not report ARR or CDP, and ARR could not be calculated |
| BOLD [49]                       | Intervention not of interest                               |
| Cheshmavar et al. (2021) [50]   | Population not of interest (SPMS)                          |
| CONCERTO [51]                   | Intervention not of interest                               |
| CONFIDENCE [52]                 | Study duration <48 weeks                                   |
| De Castro et al. (1995) [53]    | Intervention not of interest                               |
| EMPhASIS [54]                   | Study duration <48 weeks                                   |
| EU SPMS [55]                    | Population not of interest (SPMS)                          |
| European-Canadian GA [56]       | Study duration <48 weeks                                   |
| EXPAND [57]                     | Population not of interest (SPMS)                          |
| GATE [58]                       | Study duration <48 weeks                                   |
| GIMN [59]                       | Study duration <48 weeks                                   |
| Gisleskog et al. (2021) [60]    | Study duration <48 weeks                                   |
| GLACIER [61]                    | Study duration <48 weeks                                   |
| Gobbi et al. (2013) [62]        | Pilot study                                                |
| HERMES [63]                     | Intervention not of interest                               |
| IMPROVE [64]                    | Study duration <48 weeks                                   |
| Kappos et al. (2011) [65]       | Study duration <48 weeks                                   |
| Knobler et al. (1993) [66]      | Intervention not of interest                               |
| Kuhle et al. (2021) [67]        | Study duration <48 weeks                                   |
| LAQ5062 [68]                    | Intervention not of interest                               |
| Llufriu et al. (2014) [69]      | Intervention not of interest                               |
| Millefiorini et al. (1997) [70] | Intervention not of interest                               |
| MIRROR [71]                     | Study duration <48 weeks                                   |
| Mokhber et al. (2014) [72]      | Did not report ARR or CDP, and ARR could not be calculated |
| Nabavi et al. (2013) [73]       | Study duration <48 weeks                                   |
| Nabavi et al. (2019) [74]       | Did not report ARR or CDP, and ARR could not be calculated |
| Nafissi et al. (2012) [75]      | Did not report ARR or CDP, and ARR could not be calculated |
| NOVA [76]                       | Intervention not of interest                               |
| O'Connor et al. (2006) [77]     | Study duration <48 weeks                                   |
| Olsson et al. (2014) [78]       | Intervention not of interest                               |
| Pakdaman et al. (2018) [79]     | Did not report ARR or CDP, and ARR could not be calculated |
| Polman et al. (2005) [80]       | Intervention not of interest                               |
| REFINE [81]                     | Intervention not of interest                               |
| REFORMS [82]                    | Study duration <48 weeks                                   |
| RESTORE [83]                    | Study duration <48 weeks                                   |
| REVEAL [84]                     | Study closed early (median follow-up time was 39 weeks)    |
| Saida et a. (2012) [85]         | Study duration <48 weeks                                   |
| Saida et al. (2017) [86]        | Study duration <48 weeks                                   |
| SPECTRIMS [87]                  | Population not of interest (SPMS only)                     |
| SYNERGY [88]                    | Intervention not of interest                               |
| Tran et al. (2014) [89]         | Intervention not of interest                               |
| Wroe et al. (2005) [90]         | Study duration <48 weeks                                   |
| Ziemssen et al. (2017) [91]     | Intervention not of interest                               |

ARR annualised relapse rate, CDP confirmed disability progression, CIS clinically isolated syndrome, RCT randomised controlled trial, SPMS secondary progressive multiple sclerosis.

## Appendix B Characteristics of Included Trials

Table B.1. Summary of general trial characteristics.

| Trial Name               | Sample Size <sup>a</sup> | Phase | Blinding <sup>b</sup>         | MS Population  | Trial Duration <sup>c</sup> |
|--------------------------|--------------------------|-------|-------------------------------|----------------|-----------------------------|
| ADVANCE                  | 1512                     | 3     | Double-blind                  | RRMS           | 104 weeks                   |
| AFFIRM                   | 942                      | 3     | Double-blind                  | RRMS           | 104+ weeks                  |
| ASCLEPIOS I              | 927                      | 3     | Double-blind                  | RMS (94% RRMS) | 130 weeks                   |
| ASCLEPIOS II             | 955                      | 3     | Double-blind                  | RMS (94% RRMS) | 130 weeks                   |
| ASSESS                   | 1064                     | 3b    | Single-blind (patients aware) | RRMS           | 52+ weeks                   |
| BEYOND                   | 2244                     | 3     | Open label (IFN vs. GA)       | RRMS           | 104+ weeks                  |
| Boiko et al. (2018)      | 158                      | 3     | Double-blind                  | RRMS           | 48 weeks                    |
| Bornstein et al. (1987)  | 50                       | NR    | Double-blind                  | RRMS           | 104+ weeks                  |
| BRAVO                    | 1331                     | 3     | Open label                    | RRMS           | 104 weeks                   |
| Calabrese et al. (2012)  | 165                      | 4     | NR                            | RRMS           | 104 weeks                   |
| CAMMS223                 | 334                      | 2     | Open label                    | RRMS           | 156 weeks                   |
| CARE-MS I                | 581                      | 3     | Open label                    | RRMS           | 104 weeks                   |
| CARE-MS II               | 840                      | 3     | Open label                    | RRMS           | 104 weeks                   |
| CLARITY                  | 1326                     | 3     | Double-blind                  | RRMS           | 96 weeks                    |
| CombiRx                  | 1008                     | 3     | Double-blind                  | RRMS           | 156+ weeks                  |
| CONFIRM                  | 1430                     | 3     | Double-blind (except vs. GA)  | RRMS           | 104 weeks                   |
| Copolymer 1 MS trial     | 251                      | 3     | Double-blind                  | RRMS           | 104 weeks                   |
| DEFINE                   | 1237                     | 3     | Double-blind                  | RRMS           | 104 weeks                   |
| Etemadifar et al. (2006) | 90                       | 3     | Single-blind (patients aware) | RRMS           | 104 weeks                   |
| EVIDENCE                 | 677                      | NR    | Single-blind (patients aware) | RRMS           | 48 weeks                    |
| FREEDOMS                 | 1272                     | 3     | Double-blind                  | RRMS           | 104 weeks                   |
| FREEDOMS II              | 1083                     | 3     | Double-blind                  | RRMS           | 104 weeks                   |
| GALA                     | 1404                     | 3     | Double-blind                  | RRMS           | 52+ weeks                   |
| GOLDEN                   | 157                      | 4     | Open label                    | RRMS           | 78 weeks                    |
| IFNB MS                  | 372                      | NR    | Double-blind                  | RRMS           | 104 weeks                   |
| INCOMIN                  | 188                      | NR    | Open label                    | RRMS           | 104 weeks                   |
| MSCRG                    | 301                      | 3     | Double-blind                  | RMS            | 104 weeks                   |
| OPERA I                  | 821                      | 3     | Double-blind                  | RMS            | 96 weeks                    |
| OPERA II                 | 835                      | 3     | Double-blind                  | RMS            | 96 weeks                    |
| OPTIMUM                  | 1133                     | 3     | Double-blind                  | RMS            | 108 weeks                   |

| Trial Name            | Sample Size <sup>a</sup> | Phase | Blinding <sup>b</sup>         | MS Population  | Trial Duration <sup>c</sup> |
|-----------------------|--------------------------|-------|-------------------------------|----------------|-----------------------------|
| PRISMS                | 560                      | NR    | Double-blind                  | RRMS           | 104 weeks                   |
| RADIANCE-B            | 1313                     | 3     | Double-blind                  | RMS (98% RRMS) | 104 weeks                   |
| REGARD                | 764                      | 4     | Open label                    | RRMS           | 96 weeks                    |
| Stepien et al. (2013) | 68                       | NR    | NR                            | RRMS           | 156 weeks                   |
| SUNBEAM               | 1346                     | 3     | Double-blind                  | RMS (98% RRMS) | 52 weeks                    |
| TEMPO                 | 1088                     | 3     | Double-blind                  | RMS (91% RRMS) | 108 weeks                   |
| TENERE                | 324                      | 3     | Single-blind (patients aware) | RMS (99% RRMS) | 48 weeks                    |
| TOWER                 | 1169                     | 3     | Double-blind                  | RMS (97% RRMS) | 48+ weeks                   |
| TRANSFORMS            | 1292                     | 3     | Double-blind                  | RRMS           | 52 weeks                    |
| ULTIMATE I            | 545                      | 3     | Double-blind                  | RMS (98% RRMS) | 96+ weeks                   |
| ULTIMATE II           | 544                      | 3     | Double-blind                  | RMS (98% RRMS) | 96+ weeks                   |

<sup>a</sup> Includes all treatment arms (i.e., may include treatment arms that do not match the eligibility criteria of the present study).

<sup>b</sup> Patient and treating physician.

<sup>c</sup> Where trial duration was reported in years or months, we converted using 1 year = 12 months = 52 weeks.

Note: For all trials, patients were randomly assigned to treatment arms and allocation was parallel (with one exception: CombiRx had a factorial allocation).

*MS* multiple sclerosis, *NR* not reported, *RMS* relapsing multiple sclerosis, *RRMS* relapsing-remitting multiple sclerosis.

**Table B.2. Summary of patient inclusion/exclusion criteria.**

| Trial Name  | Age (Years) | MS Phenotype | EDSS Score | Relapse/Lesion History                                                                                                | Recent Relapses                            | Disease Duration                                          | Prior Corticosteroids     | Prior Treatment Experience                                                                                                                                                                                                                                                                                                                                                                                                                                                                                                                                                                                                                                                                                                                                                                                                                                                                                                                                                                                                                                                                                                                                                                                                                                                                                                                  |
|-------------|-------------|--------------|------------|-----------------------------------------------------------------------------------------------------------------------|--------------------------------------------|-----------------------------------------------------------|---------------------------|---------------------------------------------------------------------------------------------------------------------------------------------------------------------------------------------------------------------------------------------------------------------------------------------------------------------------------------------------------------------------------------------------------------------------------------------------------------------------------------------------------------------------------------------------------------------------------------------------------------------------------------------------------------------------------------------------------------------------------------------------------------------------------------------------------------------------------------------------------------------------------------------------------------------------------------------------------------------------------------------------------------------------------------------------------------------------------------------------------------------------------------------------------------------------------------------------------------------------------------------------------------------------------------------------------------------------------------------|
| ADVANCE     | 18-65       | RRMS         | 0.0-5.0    | At least 2 relapses in 3 years prior, with at least 1 relapse in 1 year prior                                         | No relapse in 50 days prior                | NR                                                        | Disallowed within 50 days | <ul style="list-style-type: none"> <li>• No prior pegylated interferon beta-1a, total lymphoid radiation, cladribine, fingolimod, T-cell or T-cell receptor vaccine, or any therapeutic mAb</li> <li>• Prior Cytoxan or mitoxantrone: Disallowed within 1 year</li> <li>• Prior IFN: Disallowed within 6 months (or for &gt;4 weeks of treatment)</li> <li>• Prior cyclosporin, plasma exchange, IVIG, azathioprine, mycophenylate, or methotrexate: Disallowed within 6 months</li> <li>• Prior treatment with another investigational drug or approved therapy for investigational use: Disallowed within 6 months</li> <li>• Prior Copaxone [GA]: Disallowed within 4 weeks</li> </ul>                                                                                                                                                                                                                                                                                                                                                                                                                                                                                                                                                                                                                                                   |
| AFFIRM      | 18-50       | RRMS         | 0.0-5.0    | At least 1 relapse in 1 year prior                                                                                    | No relapse in 50 days prior                | NR                                                        | NR                        | <ul style="list-style-type: none"> <li>• Prior cyclophosphamide or mitoxantrone: Disallowed within 1 year</li> <li>• Prior IFN or GA: Disallowed within 6 months (or for &gt;6 months of treatment)</li> <li>• Prior cyclosporine, azathioprine, methotrexate, or IVIG: Disallowed within 6 months</li> </ul>                                                                                                                                                                                                                                                                                                                                                                                                                                                                                                                                                                                                                                                                                                                                                                                                                                                                                                                                                                                                                               |
| ASCLEPIOS 1 | 18-55       | RMS          | 0.0-5.5    | At least 1 relapse in 1 year prior, or at least 2 relapses in 2 years prior, or at least 1 Gd+ lesion in 1 year prior | Neurologically stable within 1 month prior | Disease duration $\leq 10$ years if EDSS score $\leq 2.0$ | Disallowed within 30 days | <ul style="list-style-type: none"> <li>• No prior mitoxantrone (with evidence of cardiotoxicity), alemtuzumab, lymphoid irradiation, bone marrow transplantation, other strongly immunosuppressive treatments (with effects potentially lasting over 6 months), ofatumumab, or teriflunomide (if discontinued for safety or lack of efficacy)</li> <li>• Prior highly immunosuppressive/chemotherapeutic medications (mitoxantrone, cyclophosphamide, cladribine), B-cell targeted therapies such as rituximab, ocrelizumab, or laquinimod: Disallowed within 2 years</li> <li>• Prior mildly to moderately immunosuppressive/chemotherapeutic medications (eg, azathioprine, methotrexate): Disallowed within 6 months</li> <li>• Prior daclizumab: Disallowed within 4 months</li> <li>• Prior teriflunomide: Disallowed within 3.5 months or 1 month if patient undergoes an accelerated elimination procedure and has documented teriflunomide plasma level below 0.02 mg/L</li> <li>• Prior IVIG, fingolimod, or natalizumab: Disallowed within 2 months</li> <li>• Prior dimethyl fumarate: Disallowed within 1 month</li> <li>• Prior use of other investigational drugs: Disallowed within 30 days, 5 elimination half-lives, or until the expected pharmacodynamic effect has returned to baseline, whichever is longer</li> </ul> |

| Trial Name   | Age (Years) | MS Phenotype | EDSS Score | Relapse/Lesion History                                                                                                | Recent Relapses                            | Disease Duration                                          | Prior Corticosteroids     | Prior Treatment Experience                                                                                                                                                                                                                                                                                                                                                                                                                                                                                                                                                                                                                                                                                                                                                                                                                                                                                                                                                                                                                                                                                                                                                                                                                                                                                                  |
|--------------|-------------|--------------|------------|-----------------------------------------------------------------------------------------------------------------------|--------------------------------------------|-----------------------------------------------------------|---------------------------|-----------------------------------------------------------------------------------------------------------------------------------------------------------------------------------------------------------------------------------------------------------------------------------------------------------------------------------------------------------------------------------------------------------------------------------------------------------------------------------------------------------------------------------------------------------------------------------------------------------------------------------------------------------------------------------------------------------------------------------------------------------------------------------------------------------------------------------------------------------------------------------------------------------------------------------------------------------------------------------------------------------------------------------------------------------------------------------------------------------------------------------------------------------------------------------------------------------------------------------------------------------------------------------------------------------------------------|
| ASCLEPIOS II | 18-55       | RMS          | 0.0-5.5    | At least 1 relapse in 1 year prior, or at least 2 relapses in 2 years prior, or at least 1 Gd+ lesion in 1 year prior | Neurologically stable within 1 month prior | Disease duration $\leq 10$ years if EDSS score $\leq 2.0$ | Disallowed within 30 days | <ul style="list-style-type: none"> <li>No prior mitoxantrone (with evidence of cardiotoxicity), alemtuzumab, lymphoid irradiation, bone marrow transplantation, other strongly immunosuppressive treatments (with effects potentially lasting over 6 months), ofatumumab, or teriflunomide (if discontinued for safety or lack of efficacy)</li> <li>Prior highly immunosuppressive/chemotherapeutic medications (mitoxantrone, cyclophosphamide, cladribine), B-cell targeted therapies such as rituximab, ocrelizumab, or laquinimod: Disallowed within 2 years</li> <li>Prior mildly to moderately immunosuppressive/chemotherapeutic medications (eg, azathioprine, methotrexate): Disallowed within 6 months</li> <li>Prior daclizumab: Disallowed within 4 months</li> <li>Prior teriflunomide: Disallowed within 3.5 months or 1 month if patient undergoes an accelerated elimination procedure and has documented teriflunomide plasma level below 0.02 mg/L</li> <li>Prior IVIG, fingolimod, or natalizumab: Disallowed within 2 months</li> <li>Prior dimethyl fumarate: Disallowed within 1 month</li> <li>Prior use of other investigational drugs: Disallowed within 30 days, 5 elimination half-lives, or until the expected pharmacodynamic effect has returned to baseline, whichever is longer</li> </ul> |
| ASSESS       | 18-65       | RRMS         | 0.0-6.0    | At least 1 relapse in 1 year prior, or at least 2 relapses in 2 years prior                                           | No relapse in 30 days prior                | NR                                                        | Disallowed within 30 days | <ul style="list-style-type: none"> <li>No prior total lymphoid irradiation or bone marrow transplantation</li> <li>Prior lymphocyte-depleting therapies (e.g., rituximab, alemtuzumab, ofatumumab, ocrelizumab, or cladribine): Disallowed within 1 year</li> <li>Prior mitoxantrone: Disallowed within 6 months</li> <li>Prior immunosuppressive/chemotherapeutic medications (e.g., azathioprine, cyclophosphamide, methotrexate): Disallowed within 6 months</li> <li>Prior teriflunomide: Disallowed within 3.5 months, except if active washout (with either cholestyramine or activated charcoal) was done (in that case, plasma levels are required to be measured and be below 0.02 mg/L before randomization)</li> <li>Prior natalizumab: Disallowed within 2 months</li> <li>Prior high-dose IVIG: Disallowed within 4 weeks</li> </ul>                                                                                                                                                                                                                                                                                                                                                                                                                                                                           |
| BEYOND       | 18-55       | RRMS         | 0.0-5.0    | At least 1 relapse in 1 year prior                                                                                    | NR                                         | NR                                                        | NR                        | <ul style="list-style-type: none"> <li>No prior MS treatment or previous trials of drugs for MS</li> </ul>                                                                                                                                                                                                                                                                                                                                                                                                                                                                                                                                                                                                                                                                                                                                                                                                                                                                                                                                                                                                                                                                                                                                                                                                                  |

| Trial Name              | Age (Years) | MS Phenotype | EDSS Score | Relapse/Lesion History                                                                                                                                       | Recent Relapses             | Disease Duration                                           | Prior Corticosteroids                                                                                               | Prior Treatment Experience                                                                                                                                                                                                                                                                                                                                |
|-------------------------|-------------|--------------|------------|--------------------------------------------------------------------------------------------------------------------------------------------------------------|-----------------------------|------------------------------------------------------------|---------------------------------------------------------------------------------------------------------------------|-----------------------------------------------------------------------------------------------------------------------------------------------------------------------------------------------------------------------------------------------------------------------------------------------------------------------------------------------------------|
| Boiko et al. (2018)     | 18-55       | RRMS         | 0.0-5.5    | At least 1 relapse in 1 year prior, or at least 1 Gd+ T1 lesion                                                                                              | No relapse in 4 weeks prior | Disease duration >1 year                                   | Disallowed within 30 days                                                                                           | <ul style="list-style-type: none"> <li>No prior IFN beta-1a, IFN beta-1b, GA, azathioprine, corticosteroids and immunomodulators (except for treating exacerbations), drugs and mAb, cytotoxic and/or immunosuppressive drugs</li> <li>Prior participation in any other clinical trial: Disallowed within 30 days</li> </ul>                              |
| Bornstein et al. (1987) | 20-35       | RRMS         | 0.0-6.0    | At least 2 relapses in 2 years prior                                                                                                                         | NR                          | NR                                                         | NR                                                                                                                  | NR                                                                                                                                                                                                                                                                                                                                                        |
| BRAVO                   | 18-55       | RRMS         | 0.0-5.5    | At least 1 relapse in 1 year prior, or at least 2 relapses in 2 years prior, or at least 1 relapse in previous 1-2 years and 1 Gd+ lesion in previous 1 year | No relapse in 30 days prior | Disease duration (from first symptom) of at least 6 months | Disallowed within 30 days (disallowed within 2 months if systemic treatment of $\geq 30$ consecutive days duration) | <ul style="list-style-type: none"> <li>No prior natalizumab, laquinimod, cladribine, or any IFN beta</li> <li>Prior experimental drugs, investigational drugs, or immunosuppressive therapy (including mitoxantrone): Disallowed within 6 months</li> <li>Prior IVIG: Disallowed within 3 months</li> <li>Prior GA: Disallowed within 2 months</li> </ul> |
| Calabrese et al. (2012) | 18-55       | RRMS         | 0.0-5.0    | NR                                                                                                                                                           | NR                          | NR                                                         | NR                                                                                                                  | <ul style="list-style-type: none"> <li>No prior treatment with immunosuppressive drugs</li> </ul>                                                                                                                                                                                                                                                         |
| CAMMS223                | 18-50       | RRMS         | 0.0-3.0    | At least 2 clinical episodes in 2 years prior                                                                                                                | NR                          | Onset of symptoms $\leq 36$ months prior                   | NR                                                                                                                  | <ul style="list-style-type: none"> <li>No prior DMT</li> </ul>                                                                                                                                                                                                                                                                                            |
| CARE-MS I               | 18-50       | RRMS         | 0.0-3.0    | At least 2 relapses in 2 years prior, with at least 1 in 1 year prior                                                                                        | NR                          | Disease duration $\leq 5$ years                            | NR                                                                                                                  | <ul style="list-style-type: none"> <li>No prior MS therapy (apart from corticosteroids)</li> <li>No prior immunosuppressive, investigational, or mAb therapy</li> </ul>                                                                                                                                                                                   |
| CARE-MS II              | 18-55       | RRMS         | 0.0-5.0    | At least 2 attacks in 2 years prior, with at least 1 in 1 year prior and at least 1 relapse while on IFN beta or GA after $\geq 6$ months of treatment       | NR                          | Disease duration $\leq 10$ years                           | NR                                                                                                                  | <ul style="list-style-type: none"> <li>No prior alemtuzumab, cytotoxic drug use, or investigational therapy</li> <li>Prior natalizumab, methotrexate, azathioprine, or ciclosporin: Disallowed within 6 months</li> </ul>                                                                                                                                 |

| Trial Name           | Age (Years) | MS Phenotype | EDSS Score | Relapse/Lesion History                                                                                                             | Recent Relapses                                                  | Disease Duration | Prior Corticosteroids     | Prior Treatment Experience                                                                                                                                                                                                                                                                                                                                                                                                                                                                                                                                                                                              |
|----------------------|-------------|--------------|------------|------------------------------------------------------------------------------------------------------------------------------------|------------------------------------------------------------------|------------------|---------------------------|-------------------------------------------------------------------------------------------------------------------------------------------------------------------------------------------------------------------------------------------------------------------------------------------------------------------------------------------------------------------------------------------------------------------------------------------------------------------------------------------------------------------------------------------------------------------------------------------------------------------------|
| CLARITY              | 18-65       | RRMS         | 0.0-5.5    | At least 1 relapse in 1 year prior                                                                                                 | No relapse in 28 days prior                                      | NR               | Disallowed within 28 days | <ul style="list-style-type: none"> <li>No more than 1 previous DMTs failed</li> <li>No prior cladribine, mitoxantrone, total lymphoid irradiation, myelosuppressive therapy, campath-1h, cyclophosphamide, azathioprine, methotrexate, natalizumab, or immunosuppressive therapy</li> <li>Prior investigational drug or experimental procedure: Disallowed within 6 months</li> <li>Prior DMT use: Disallowed within 3 months</li> <li>Prior cytokine-based therapy, IVIG, or plasmapheresis: Disallowed within 3 months</li> </ul>                                                                                     |
| CombiRx              | 18-60       | RRMS         | 0.0-5.5    | At least 2 exacerbations in 3 years prior, where 1 could be an MRI change meeting 2001 McDonald criteria for dissemination in time | No acute exacerbation in 30 days prior                           | NR               | Disallowed within 30 days | <ul style="list-style-type: none"> <li>No prior IFN beta, GA, natalizumab, cladribine, T cell vaccine, Campath, daclizumab, rituximab, altered peptide ligand, total lymphoid irradiation, chronic systemic steroid use, or any other investigational drug unless approved by study coordinator</li> <li>Prior IVIG, azathioprine, methotrexate, cyclosporine, mitoxantrone, cyclophosphamide, mycophenolate, or plasma exchange: Disallowed within 12 weeks</li> <li>Prior 4-aminopyridines: Disallowed within 4 weeks</li> </ul>                                                                                      |
| CONFIRM              | 18-55       | RRMS         | 0.0-5.0    | At least 1 relapse in 1 year prior, or at least 1 Gd+ lesion in 6 weeks prior                                                      | No relapse in 50 days prior and stabilized from previous relapse | NR               | Disallowed within 50 days | <ul style="list-style-type: none"> <li>No prior FUMADERM®, BG-12, GA, total lymphoid irradiation, cladribine, or T-cell or T-cell receptor vaccination</li> <li>Prior mitoxantrone or cyclophosphamide: Disallowed within 1 year</li> <li>Prior cyclosporine, azathioprine, methotrexate, natalizumab, IVIG, plasmapheresis, or cytapheresis: Disallowed within 6 months</li> <li>Prior IFN alpha or IFN beta: Disallowed within 3 months</li> </ul>                                                                                                                                                                    |
| Copolymer 1 MS trial | 18-45       | RRMS         | 0.0-5.0    | At least 2 relapses in 2 year prior, with onset of 1st relapse at least 1 year prior                                               | No relapse in 30 days prior                                      | NR               | Disallowed within 30 days | <ul style="list-style-type: none"> <li>No prior GA, immunosuppressive therapy with cytotoxic chemotherapy (azathioprine, cyclophosphamide, or cyclosporine), or lymphoid irradiation</li> </ul>                                                                                                                                                                                                                                                                                                                                                                                                                         |
| DEFINE               | 18-55       | RRMS         | 0.0-5.0    | At least 1 relapse in 1 year prior, or at least 1 Gd+ lesion in 6 weeks prior                                                      | No relapse in 50 days prior and stabilized from previous relapse | NR               | Disallowed within 50 days | <ul style="list-style-type: none"> <li>No prior Fumaderm®, BG-12, total lymphoid irradiation, cladribine, T-cell or T-cell receptor vaccination, or any therapeutic mAb except for natalizumab</li> <li>Prior mitoxantrone or cyclophosphamide: Disallowed within 1 year</li> <li>Prior cyclosporine, azathioprine, methotrexate, natalizumab, mycophenolate mofetil, IVIG, plasmapheresis, cytapheresis, or another investigational drug or approved therapy for investigational use: Disallowed within 6 months</li> <li>Prior subcutaneous or oral GA, IFN alpha, or IFN beta: Disallowed within 3 months</li> </ul> |

| Trial Name               | Age (Years) | MS Phenotype | EDSS Score | Relapse/Lesion History                                                                                                                                       | Recent Relapses             | Disease Duration | Prior Corticosteroids                                                       | Prior Treatment Experience                                                                                                                                                                                                                                                                                                                                                                                                                                                                                                                                                                                                                |
|--------------------------|-------------|--------------|------------|--------------------------------------------------------------------------------------------------------------------------------------------------------------|-----------------------------|------------------|-----------------------------------------------------------------------------|-------------------------------------------------------------------------------------------------------------------------------------------------------------------------------------------------------------------------------------------------------------------------------------------------------------------------------------------------------------------------------------------------------------------------------------------------------------------------------------------------------------------------------------------------------------------------------------------------------------------------------------------|
| Etemadifar et al. (2006) | 15-50       | RRMS         | 0.0-5.0    | At least 2 exacerbations in 2 years prior                                                                                                                    | NR                          | NR               | NR                                                                          | NR                                                                                                                                                                                                                                                                                                                                                                                                                                                                                                                                                                                                                                        |
| EVIDENCE                 | 18-55       | RRMS         | 0.0-5.5    | At least 2 exacerbations in 2 years prior                                                                                                                    | NR                          | NR               | NR                                                                          | <ul style="list-style-type: none"> <li>• No prior IFN, cladribine, or total lymphoid irradiation</li> <li>• Prior other immunomodulatory agents: Disallowed within 12 months</li> <li>• Prior IVIG: Disallowed within 6 months</li> <li>• Prior GA or cytokine therapy: Disallowed within 3 months</li> </ul>                                                                                                                                                                                                                                                                                                                             |
| FREEDOMS                 | 18-55       | RRMS         | 0.0-5.5    | At least 1 relapse in 1 year prior, or at least 2 relapses in 2 years prior                                                                                  | No relapse in 30 days prior | NR               | Disallowed within 30 days                                                   | <ul style="list-style-type: none"> <li>• Prior IFN or GA: Disallowed within 3 months</li> </ul>                                                                                                                                                                                                                                                                                                                                                                                                                                                                                                                                           |
| FREEDOMS II              | 18-55       | RRMS         | 0.0-5.5    | At least 1 relapse in 1 year prior, or at least 2 relapses in 2 years prior                                                                                  | No relapse in 30 days prior | NR               | Disallowed within 1 month                                                   | <ul style="list-style-type: none"> <li>• No prior total lymphoid irradiation, bone marrow transplantation, cladribine, cyclophosphamide, mitoxantrone, or fingolimod</li> <li>• Prior natalizumab: Disallowed within 6 months</li> <li>• Prior immunosuppressive medications such as azathioprine or methotrexate: Disallowed within 6 months</li> <li>• Prior immunoglobulins and/or mAb: Disallowed within 6 months</li> <li>• Prior participation in any clinical research study evaluating another investigational drug or therapy: Disallowed within 6 months</li> <li>• Prior IFN-beta or GA: Disallowed within 3 months</li> </ul> |
| GALA                     | 18-55       | RRMS         | 0.0-5.5    | At least 1 relapse in 1 year prior, or at least 2 relapses in 2 years prior, or at least 1 relapse in previous 1-2 years and 1 Gd+ lesion in previous 1 year | No relapse in 30 days prior | NR               | Disallowed within 6 months if chronic [ $>30$ days] systemic corticosteroid | <ul style="list-style-type: none"> <li>• No prior GA or any other glatiramide</li> <li>• Prior cladribine, natalizumab, or any other monoclonal antibody treatment: Disallowed within 2 years</li> <li>• Prior immunosuppressive agents, including mitoxantrone and fingolimod, or cytotoxic agents: Disallowed within 6 months</li> <li>• Prior immunomodulators, including IFN beta and IVIG: Disallowed within 2 months</li> </ul>                                                                                                                                                                                                     |
| GOLDEN                   | 18-60       | RRMS         | 0.0-5.0    | At least 1 relapse in 1 year prior, or at least 2 relapses in 2 years prior if at least 1 Gd+ lesion on MRI performed in previous 6 months                   | No relapse in 30 days prior | NR               | Disallowed within 1 month                                                   | <ul style="list-style-type: none"> <li>• Unsatisfactory response with multi-weekly IFN beta-1a/b</li> <li>• No prior cladribine, cyclophosphamide, mitoxantrone, total lymphoid irradiation, or bone marrow transplantation</li> <li>• Prior immunosuppressive medications such as azathioprine or methotrexate: Disallowed within 3 months</li> <li>• Immunoglobulins and/or mAb: Disallowed within 3 months</li> <li>• Participation in any clinical research study: Disallowed within 6 months</li> </ul>                                                                                                                              |

| Trial Name | Age (Years) | MS Phenotype | EDSS Score | Relapse/Lesion History                                                      | Recent Relapses                          | Disease Duration                                          | Prior Corticosteroids      | Prior Treatment Experience                                                                                                                                                                                                                                                                                                                                                                                                                                                                                                                                                                                                                                                                       |
|------------|-------------|--------------|------------|-----------------------------------------------------------------------------|------------------------------------------|-----------------------------------------------------------|----------------------------|--------------------------------------------------------------------------------------------------------------------------------------------------------------------------------------------------------------------------------------------------------------------------------------------------------------------------------------------------------------------------------------------------------------------------------------------------------------------------------------------------------------------------------------------------------------------------------------------------------------------------------------------------------------------------------------------------|
| IFNB MS    | 18-50       | RRMS         | 0.0-5.5    | At least 2 acute exacerbations in 2 years prior                             | No relapse in 30 days prior              | Disease duration $\geq 1$ year                            | Disallowed within 30 days  | <ul style="list-style-type: none"> <li>No prior azathioprine or cyclophosphamide</li> </ul>                                                                                                                                                                                                                                                                                                                                                                                                                                                                                                                                                                                                      |
| INCOMIN    | 18-50       | RRMS         | 1.0-3.5    | At least 2 relapses in 2 years prior                                        | No relapse in 30 days prior              | NR                                                        | Disallowed within 30 days  | <ul style="list-style-type: none"> <li>No prior immunosuppressive or immunomodulatory drugs except corticosteroids</li> </ul>                                                                                                                                                                                                                                                                                                                                                                                                                                                                                                                                                                    |
| MSCRG      | 18-55       | RMS          | 1.0-3.5    | At least 2 relapses in 3 years prior                                        | No exacerbations in 2 months prior       | Disease duration $\geq 1$ year                            | Disallowed within 2 months | <ul style="list-style-type: none"> <li>No prior immunosuppressive drugs or IFN</li> </ul>                                                                                                                                                                                                                                                                                                                                                                                                                                                                                                                                                                                                        |
| OPERA I    | 18-55       | RMS          | 0.0-5.5    | At least 2 relapses in 2 years prior, or at least 1 relapse in 1 year prior | No neurologic worsening in 30 days prior | Disease duration $\leq 10$ years if EDSS score $\leq 2.0$ | NR                         | <ul style="list-style-type: none"> <li>No prior B-cell-targeted therapies (i.e., rituximab, ocrelizumab, atacicept, belimumab, or ofatumumab), alemtuzumab, anti-CD4, cladribine, mitoxantrone, daclizumab, teriflunomide, laquinimod, total body irradiation, or bone marrow transplantation</li> <li>Prior cyclophosphamide, azathioprine, mycophenolate mofetil, cyclosporine, methotrexate, or natalizumab: Disallowed within 24 months (natalizumab allowed only if duration was <math>&lt; 1</math> year)</li> <li>Prior treatment with any investigational agent, fingolimod, or dimethyl fumarate: Disallowed within 6 months</li> <li>Prior IVIG: Disallowed within 12 weeks</li> </ul> |
| OPERA II   | 18-55       | RMS          | 0.0-5.5    | At least 2 relapses in 2 years prior, or at least 1 relapse in 1 year prior | No neurologic worsening in 30 days prior | Disease duration $\leq 10$ years if EDSS score $\leq 2.0$ | NR                         | <ul style="list-style-type: none"> <li>No prior B-cell-targeted therapies (i.e., rituximab, ocrelizumab, atacicept, belimumab, or ofatumumab), alemtuzumab, anti-CD4, cladribine, mitoxantrone, daclizumab, teriflunomide, laquinimod, total body irradiation, or bone marrow transplantation</li> <li>Prior cyclophosphamide, azathioprine, mycophenolate mofetil, cyclosporine, methotrexate, or natalizumab: Disallowed within 24 months (natalizumab allowed only if duration was <math>&lt; 1</math> year)</li> <li>Prior treatment with any investigational agent, fingolimod, or dimethyl fumarate: Disallowed within 6 months</li> <li>Prior IVIG: Disallowed within 12 weeks</li> </ul> |

| Trial Name | Age (Years) | MS Phenotype | EDSS Score | Relapse/Lesion History                                                                                                                      | Recent Relapses             | Disease Duration               | Prior Corticosteroids     | Prior Treatment Experience                                                                                                                                                                                                                                                                                                                                                                                                                                                                                                                                                                                                                                                                                                                                                                                                                                                                                                                                                                                                                                                                                                                                                                                                             |
|------------|-------------|--------------|------------|---------------------------------------------------------------------------------------------------------------------------------------------|-----------------------------|--------------------------------|---------------------------|----------------------------------------------------------------------------------------------------------------------------------------------------------------------------------------------------------------------------------------------------------------------------------------------------------------------------------------------------------------------------------------------------------------------------------------------------------------------------------------------------------------------------------------------------------------------------------------------------------------------------------------------------------------------------------------------------------------------------------------------------------------------------------------------------------------------------------------------------------------------------------------------------------------------------------------------------------------------------------------------------------------------------------------------------------------------------------------------------------------------------------------------------------------------------------------------------------------------------------------|
| OPTIMUM    | 18-55       | RMS          | 0.0-5.5    | At least 1 relapse in 1 year prior, or at least 2 relapses in 2 years prior, or at least 1 Gd+ lesion on MRI performed in previous 6 months | No relapse in 30 days prior | NR                             | Disallowed within 30 days | <ul style="list-style-type: none"> <li>• No prior alemtuzumab; mitoxantrone, leflunomide, or teriflunomide; fingolimod; ponesimod; other investigational S1P modulators; or stem-cell transplantation</li> <li>• Prior lymphocyte-depleting biological agents such as rituximab or ocrelizumab, or cladribine: Disallowed within 24 months</li> <li>• Prior azathioprine, methotrexate, or cyclophosphamide; natalizumab; other systemic immunosuppressive treatment (e.g., cyclosporine, sirolimus, mycophenolic acid); or non-lymphocyte-depleting experimental biological agents (e.g., daclizumab): Disallowed within 180 days</li> <li>• Prior plasmapheresis, cytapapheresis; intravenous immunoglobulin; or treatment with an investigational drug (within 90 days or five half-lives of the drug, whichever is longer), except biological agents: Disallowed within 90 days</li> <li>• Prior dimethyl fumarate: Disallowed within 30 days</li> <li>• Prior beta-blockers, diltiazem, verapamil, digoxin or any other anti-arrhythmic or HR lowering systemic therapy; or cholestyramine or activated charcoal: Disallowed within 15 days</li> <li>• Prior IFN beta-1a, IFN beta-1b, or GA: Disallowed within 7 days</li> </ul> |
| PRISMS     | NR (adults) | RRMS         | 0.0-5.0    | At least 2 relapses in 2 years prior                                                                                                        | NR                          | Disease duration $\geq 1$ year | NR                        | <ul style="list-style-type: none"> <li>• No prior IFN, lymphoid irradiation, or cyclophosphamide</li> <li>• Prior treatment with other immunosuppressive or immunomodulatory drugs: Disallowed within 12 months</li> </ul>                                                                                                                                                                                                                                                                                                                                                                                                                                                                                                                                                                                                                                                                                                                                                                                                                                                                                                                                                                                                             |

| Trial Name            | Age (Years) | MS Phenotype | EDSS Score | Relapse/Lesion History                                                                                               | Recent Relapses                                         | Disease Duration                                          | Prior Corticosteroids     | Prior Treatment Experience                                                                                                                                                                                                                                                                                                                                                                                                                                                                                                                                                                                                                                                                                                                                                                                                                                                                                                                                                                                                                |
|-----------------------|-------------|--------------|------------|----------------------------------------------------------------------------------------------------------------------|---------------------------------------------------------|-----------------------------------------------------------|---------------------------|-------------------------------------------------------------------------------------------------------------------------------------------------------------------------------------------------------------------------------------------------------------------------------------------------------------------------------------------------------------------------------------------------------------------------------------------------------------------------------------------------------------------------------------------------------------------------------------------------------------------------------------------------------------------------------------------------------------------------------------------------------------------------------------------------------------------------------------------------------------------------------------------------------------------------------------------------------------------------------------------------------------------------------------------|
| RADIANCE-B            | 18-55       | RMS          | 0.0-5.0    | At least 1 relapse in 1 year prior, or at least 1 relapse in 2 years prior and at least 1 Gd+ lesion in 1 year prior | No relapse in 30 days prior                             | Disease duration $\leq 15$ years if EDSS score $\leq 2.0$ | Disallowed within 30 days | <ul style="list-style-type: none"> <li>No prior lymphocyte-depleting therapies (e.g., alemtuzumab, anti-CD4, cladribine, rituximab, ocrelizumab, cyclophosphamide, mitoxantrone, total body irradiation, bone marrow transplantation), lymphocyte trafficking blockers (e.g., natalizumab, fingolimod, other sphingosine 1-phosphate receptor 1 agonists), or medications with a known impact on the cardiac conduction system</li> <li>Prior other immunosuppressant agents such as azathioprine, cyclosporine, methotrexate, or mycophenolate, or use of any investigational agent: Disallowed within 6 months</li> <li>Prior IVIG or plasmapheresis, or other disease modifying therapies (e.g., dimethyl fumarate, teriflunomide, daclizumab, laquinimod): Disallowed within 3 months</li> <li>Prior therapies that were not allowed based on cytochrome P450 3A4 (CYP3A4) metabolism: Disallowed within 4 weeks</li> <li>Prior non-lymphocyte-depleting DMTs (e.g., GA, IFN): Disallowed from signing of informed consent</li> </ul> |
| REGARD                | 18-60       | RRMS         | 0.0-5.5    | At least 1 attack in 1 year prior                                                                                    | Stable or neurologically improving during prior 4 weeks | NR                                                        | Disallowed within 4 weeks | <ul style="list-style-type: none"> <li>No prior IFN beta, GA, cladribine, or total lymphoid irradiation</li> <li>Prior immunosuppressant use: Disallowed within 12 months</li> <li>Prior IVIG: Disallowed within 6 months</li> <li>Prior treatment with any other investigational drug or taking part in any experimental procedure: Disallowed within 6 months</li> <li>Prior cytokine or anticytokine therapy: Disallowed within 3 months</li> <li>Prior plasma exchange: Disallowed within 3 months</li> </ul>                                                                                                                                                                                                                                                                                                                                                                                                                                                                                                                         |
| Stepien et al. (2013) | NR (adults) | RRMS         | 0.0-6.5    | NR                                                                                                                   | NR                                                      | NR                                                        | Disallowed within 4 weeks | <ul style="list-style-type: none"> <li>No prior IFN beta or other immunomodulatory drugs</li> </ul>                                                                                                                                                                                                                                                                                                                                                                                                                                                                                                                                                                                                                                                                                                                                                                                                                                                                                                                                       |

| Trial Name | Age (Years) | MS Phenotype | EDSS Score | Relapse/Lesion History                                                                                               | Recent Relapses                                       | Disease Duration                                          | Prior Corticosteroids     | Prior Treatment Experience                                                                                                                                                                                                                                                                                                                                                                                                                                                                                                                                                                                                                                                                                                                                                                                                                                                                                                                                                                                                                |
|------------|-------------|--------------|------------|----------------------------------------------------------------------------------------------------------------------|-------------------------------------------------------|-----------------------------------------------------------|---------------------------|-------------------------------------------------------------------------------------------------------------------------------------------------------------------------------------------------------------------------------------------------------------------------------------------------------------------------------------------------------------------------------------------------------------------------------------------------------------------------------------------------------------------------------------------------------------------------------------------------------------------------------------------------------------------------------------------------------------------------------------------------------------------------------------------------------------------------------------------------------------------------------------------------------------------------------------------------------------------------------------------------------------------------------------------|
| SUNBEAM    | 18-55       | RMS          | 0.0-5.0    | At least 1 relapse in 1 year prior, or at least 1 relapse in 2 years prior and at least 1 Gd+ lesion in 1 year prior | No relapse in 30 days prior                           | Disease duration $\leq 15$ years if EDSS score $\leq 2.0$ | Disallowed within 30 days | <ul style="list-style-type: none"> <li>No prior lymphocyte-depleting therapies (e.g., alemtuzumab, anti-CD4, cladribine, rituximab, ocrelizumab, cyclophosphamide, mitoxantrone, total body irradiation, bone marrow transplantation), lymphocyte trafficking blockers (e.g., natalizumab, fingolimod, other sphingosine 1-phosphate receptor 1 agonists), or medications with a known impact on the cardiac conduction system</li> <li>Prior other immunosuppressant agents such as azathioprine, cyclosporine, methotrexate, or mycophenolate, or use of any investigational agent: Disallowed within 6 months</li> <li>Prior IVIG or plasmapheresis, or other disease modifying therapies (e.g., dimethyl fumarate, teriflunomide, daclizumab, laquinimod): Disallowed within 3 months</li> <li>Prior therapies that were not allowed based on cytochrome P450 3A4 (CYP3A4) metabolism: Disallowed within 4 weeks</li> <li>Prior non-lymphocyte-depleting DMTs (e.g., GA, IFN): Disallowed from signing of informed consent</li> </ul> |
| TEMSO      | 18-55       | RMS          | 0.0-5.5    | At least 2 relapses in 2 years prior, or at least 1 relapse in 1 year prior                                          | No relapse in 60 days prior, stable for 30 days prior | NR                                                        | Disallowed within 30 days | <ul style="list-style-type: none"> <li>No prior cladribine, mitoxantrone, or other immunosuppressant agents such as azathioprine, cyclophosphamide, cyclosporin, methotrexate or mycophenolate</li> </ul>                                                                                                                                                                                                                                                                                                                                                                                                                                                                                                                                                                                                                                                                                                                                                                                                                                 |
| TENERE     | $\geq 18$   | RMS          | 0.0-5.5    | NR                                                                                                                   | No relapse in 30 days prior                           | NR                                                        | Disallowed within 2 weeks | <ul style="list-style-type: none"> <li>No prior subcutaneous IFN beta-1a, teriflunomide, leflunomide, natalizumab, cladribine, mitoxantrone, or other immunosuppressants</li> <li>Prior investigational agents: Disallowed within 6 months</li> <li>Prior other IFN, GA, IVIG, or cytokine therapy: Disallowed within 3 months</li> </ul>                                                                                                                                                                                                                                                                                                                                                                                                                                                                                                                                                                                                                                                                                                 |
| TOWER      | 18-55       | RMS          | 0.0-5.5    | At least 1 relapse in 1 year prior, or at least 2 relapses in 2 years prior                                          | No relapse in 30 days prior                           | NR                                                        | Disallowed within 2 weeks | <ul style="list-style-type: none"> <li>No prior natalizumab or other immunosuppressive agents, teriflunomide, leflunomide, cladribine, mitoxantrone, or other immunosuppressant agents such as azathioprine, cyclophosphamide, cyclosporin, methotrexate or mycophenolate</li> <li>Prior use of any investigational drug: Disallowed within 6 months</li> <li>Prior cytokine therapy, IVIG, IFN beta, or GA: Disallowed within 3 months</li> </ul>                                                                                                                                                                                                                                                                                                                                                                                                                                                                                                                                                                                        |
| TRANSFORMS | 18-55       | RRMS         | 0.0-5.5    | At least 1 relapse in 1 year prior, or at least 2 relapses in 2 years prior                                          | No relapse in 30 days prior                           | NR                                                        | Disallowed within 30 days | NR                                                                                                                                                                                                                                                                                                                                                                                                                                                                                                                                                                                                                                                                                                                                                                                                                                                                                                                                                                                                                                        |

| Trial Name  | Age (Years) | MS Phenotype | EDSS Score | Relapse/Lesion History                                                                                                                | Recent Relapses                      | Disease Duration                                    | Prior Corticosteroids | Prior Treatment Experience                                                                                                                                                                                                                                                                                                                                                                                                                                                                                                                                                             |
|-------------|-------------|--------------|------------|---------------------------------------------------------------------------------------------------------------------------------------|--------------------------------------|-----------------------------------------------------|-----------------------|----------------------------------------------------------------------------------------------------------------------------------------------------------------------------------------------------------------------------------------------------------------------------------------------------------------------------------------------------------------------------------------------------------------------------------------------------------------------------------------------------------------------------------------------------------------------------------------|
| ULTIMATE I  | 18-55       | RMS          | 0.0-5.5    | At least 1 relapse in 1 year prior, or at least 2 relapses in 2 years prior, or at least 1 Gd+ lesion on MRI scan during 1 year prior | Neurologically stable within 30 days | Disease duration <15 years if EDSS score $\leq$ 2.0 | NR                    | <ul style="list-style-type: none"> <li>• No prior anti-CD20 or other B cell directed treatment, alemtuzumab, natalizumab, teriflunomide, leflunomide, or stem cell transplantation</li> <li>• Cladribine: Disallowed within 24 months</li> <li>• Daclizumab, azathioprine, methotrexate, or cyclophosphamide: Disallowed within 6 months</li> <li>• Fingolimod, or experimental S1P modulators, IVIG, and plasmapheresis: Disallowed within 90 days</li> <li>• Glatiramer acetate, interferons, dimethyl fumarate, laquinimod or glucocorticoids: Disallowed within 30 days</li> </ul> |
| ULTIMATE II | 18-55       | RMS          | 0.0-5.5    | At least 1 relapse in 1 year prior, or at least 2 relapses in 2 years prior, or at least 1 Gd+ lesion on MRI scan during 1 year prior | Neurologically stable within 30 days | Disease duration <15 years if EDSS score $\leq$ 2.0 | NR                    | <ul style="list-style-type: none"> <li>• No prior anti-CD20 or other B cell directed treatment, alemtuzumab, natalizumab, teriflunomide, leflunomide, or stem cell transplantation</li> <li>• Cladribine: Disallowed within 24 months</li> <li>• Daclizumab, azathioprine, methotrexate, or cyclophosphamide: Disallowed within 6 months</li> <li>• Fingolimod, or experimental S1P modulators, IVIG, and plasmapheresis: Disallowed within 90 days</li> <li>• Glatiramer acetate, interferons, dimethyl fumarate, laquinimod or glucocorticoids: Disallowed within 30 days</li> </ul> |

*DMT* disease-modifying therapy, *EDSS* Expanded Disability Status Scale, *GA* glatiramer acetate, *Gd+* gadolinium enhancing, *IFN* interferon, *IVIG* intravenous immunoglobulin, *mAb* monoclonal antibody, *MRI* magnetic resonance imaging, *NR* not reported, *RMS* relapsing multiple sclerosis, *RRMS* relapsing-remitting multiple sclerosis.

**Table B.3. Summary of baseline patient characteristics.**

| Trial Name              | Treatment          | Sample Size | Baseline Characteristics <sup>a</sup> |            |            |                             |                                      |                                 |                                  |                                 |                       |                                         |
|-------------------------|--------------------|-------------|---------------------------------------|------------|------------|-----------------------------|--------------------------------------|---------------------------------|----------------------------------|---------------------------------|-----------------------|-----------------------------------------|
|                         |                    |             | Age (years)                           | EDSS Score | Female (%) | Previous DMT Experience (%) | Time Since First MS Symptoms (years) | Time Since MS Diagnosis (years) | Relapses Within Previous 2 Years | Relapses Within Previous 1 Year | Number of Gd+ Lesions | Volume of T2 Lesions (cm <sup>3</sup> ) |
| ADVANCE                 | PBO                | 500         | 36.3                                  | 2.4        | 72%        | 17% <sup>b</sup>            | 6.3                                  | 3.5                             | NR                               | 1.6                             | 1.6                   | NR                                      |
|                         | PEG                | 512         | 36.9                                  | 2.5        | 71%        | 17% <sup>b</sup>            | 6.9                                  | 4.0                             | NR                               | 1.6                             | 1.2                   | NR                                      |
| AFFIRM                  | PBO                | 315         | 36.7                                  | 2.3        | 67%        | NR                          | NR                                   | NR                              | NR                               | 1.5                             | 2.0                   | NR                                      |
|                         | NAT                | 627         | 35.6                                  | 2.3        | 72%        | NR                          | NR                                   | NR                              | NR                               | 1.5                             | 2.2                   | NR                                      |
| ASCLEPIOS I             | TER 14 mg          | 462         | 37.8                                  | 2.9        | 69%        | 61%                         | 8.2                                  | 5.6                             | NR                               | 1.3                             | 1.2                   | 13.1                                    |
|                         | OMB                | 465         | 38.9                                  | 3.0        | 68%        | 59%                         | 8.4                                  | 5.8                             | NR                               | 1.2                             | 1.7                   | 13.2                                    |
| ASCLEPIOS II            | TER 14 mg          | 474         | 38.2                                  | 2.9        | 67%        | 62%                         | 8.2                                  | 5.5                             | NR                               | 1.3                             | 1.5                   | 12.0                                    |
|                         | OMB                | 481         | 38.0                                  | 2.9        | 66%        | 60%                         | 8.2                                  | 5.6                             | NR                               | 1.3                             | 1.6                   | 14.3                                    |
| ASSESS                  | GA 20 mg           | 342         | 39.6                                  | 2.7        | 74%        | NR                          | 7.5                                  | 4.7                             | 2.2                              | 1.4                             | 1.6                   | 8.8                                     |
|                         | FIN                | 352         | 40.3                                  | 2.7        | 75%        | NR                          | 7.4                                  | 4.3                             | 2.2                              | 1.4                             | 1.7                   | 10.3                                    |
| BEYOND                  | IFNB-1b SC         | 897         | 35.8                                  | 2.4        | 70%        | NR                          | NR                                   | 5.3                             | NR                               | 1.6                             | 2.3                   | 9.3                                     |
|                         | GA 20 mg           | 448         | 35.2                                  | 2.3        | 68%        | NR                          | NR                                   | 5.1                             | NR                               | 1.6                             | 1.8                   | 9.2                                     |
| Boiko et al. (2018)     | PBO                | 28          | NR                                    | NR         | NR         | NR                          | 5.6                                  | NR                              | NR                               | 1.2                             | 1.9                   | 4.0                                     |
|                         | GA 20 mg           | 61          | NR                                    | NR         | NR         | NR                          | 5.0                                  | NR                              | NR                               | 1.3                             | 1.5                   | 4.1                                     |
|                         | GA 20 mg (Timexon) | 61          | NR                                    | NR         | NR         | NR                          | 5.6                                  | NR                              | NR                               | 1.3                             | 2.0                   | 6.2                                     |
| Bornstein et al. (1987) | PBO                | 23          | 31.1                                  | 3.1        | 57%        | NR                          | NR                                   | 6.4                             | 3.9                              | NR                              | NR                    | NR                                      |
|                         | GA 20 mg           | 25          | 30.0                                  | 2.9        | 56%        | NR                          | NR                                   | 4.9                             | 3.8                              | NR                              | NR                    | NR                                      |
| BRAVO                   | PBO                | 450         | NR                                    | NR         | 71%        | 6%                          | NR                                   | NR                              | NR                               | NR                              | NR                    | NR                                      |
|                         | IFNB-1a IM         | 447         | NR                                    | NR         | 69%        | 9%                          | NR                                   | NR                              | NR                               | NR                              | NR                    | NR                                      |
| Calabrese et al. (2012) | IFNB-1a IM         | 47          | 34.8                                  | 1.9        | 68%        | NR                          | NR                                   | 5.3                             | NR                               | 1.2                             | NR                    | NR                                      |
|                         | IFNB-1a SC 44 µg   | 46          | 35.9                                  | 1.9        | 70%        | NR                          | NR                                   | 5.7                             | NR                               | 1.2                             | NR                    | NR                                      |
|                         | GA 20 mg           | 48          | 38.9                                  | 2.1        | 73%        | NR                          | NR                                   | 5.5                             | NR                               | 1.3                             | NR                    | NR                                      |
| CAMMS223                | IFNB-1a SC 44 µg   | 111         | 32.8                                  | 1.9        | 64%        | NR                          | NR                                   | NR                              | NR                               | NR                              | NR                    | 15.8                                    |
|                         | ALE                | 112         | 31.9                                  | 1.9        | 64%        | NR                          | NR                                   | NR                              | NR                               | NR                              | NR                    | 17.2                                    |
| CARE-MS I               | IFNB-1a SC 44 µg   | 187         | 33.2                                  | 2.0        | 65%        | 0%                          | 2.0                                  | NR                              | NR                               | 1.8                             | 2.2                   | 7.3                                     |
|                         | ALE                | 376         | 33.0                                  | 2.0        | 65%        | 0%                          | 2.1                                  | NR                              | NR                               | 1.8                             | 2.3                   | 7.4                                     |
| CARE-MS II              | IFNB-1a SC 44 µg   | 202         | 35.8                                  | 2.7        | 65%        | 100%                        | 4.7                                  | NR                              | NR                               | 1.5                             | 2.1                   | 9.0                                     |
|                         | ALE                | 426         | 34.8                                  | 2.7        | 66%        | 100%                        | 4.5                                  | NR                              | NR                               | 1.7                             | 2.3                   | 9.9                                     |
| CLARITY                 | PBO                | 437         | 38.7                                  | 2.9        | 66%        | 32%                         | 8.9                                  | NR                              | NR                               | NR                              | 0.8                   | 14.3                                    |
|                         | CLA                | 433         | 37.9                                  | 2.8        | 69%        | 26%                         | 7.9                                  | NR                              | NR                               | NR                              | 1.0                   | 14.8                                    |
| CombiRx                 | IFNB-1a IM         | 250         | 37.6                                  | 2.0        | 69%        | NR                          | NR                                   | 1.4                             | NR                               | 1.7                             | 4.1                   | 10.1                                    |
|                         | GA 20 mg           | 259         | 39.0                                  | 1.9        | 71%        | NR                          | NR                                   | 1.0                             | NR                               | 1.6                             | 4.6                   | 11.0                                    |
| CONFIRM                 | PBO                | 363         | 36.9                                  | 2.6        | 69%        | 31%                         | NR                                   | 4.8                             | NR                               | 1.4                             | 2.7                   | 14.6                                    |
|                         | GA 20 mg           | 350         | 36.7                                  | 2.6        | 71%        | 29%                         | NR                                   | 4.4                             | NR                               | 1.4                             | 2.4                   | 13.8                                    |
|                         | DMF                | 359         | 37.8                                  | 2.6        | 68%        | 28%                         | NR                                   | 4.9                             | NR                               | 1.3                             | 2.7                   | 13.9                                    |
| Copolymer 1 MS trial    | PBO                | 126         | 34.3                                  | 2.4        | 76%        | NR                          | NR                                   | 6.6                             | 2.9                              | NR                              | NR                    | NR                                      |
|                         | GA 20 mg           | 125         | 34.6                                  | 2.8        | 70%        | NR                          | NR                                   | 7.3                             | 2.9                              | NR                              | NR                    | NR                                      |

| Trial Name               | Treatment        | Sample Size | Baseline Characteristics <sup>a</sup> |            |                  |                             |                                      |                                 |                                  |                                 |                       |                                         |
|--------------------------|------------------|-------------|---------------------------------------|------------|------------------|-----------------------------|--------------------------------------|---------------------------------|----------------------------------|---------------------------------|-----------------------|-----------------------------------------|
|                          |                  |             | Age (years)                           | EDSS Score | Female (%)       | Previous DMT Experience (%) | Time Since First MS Symptoms (years) | Time Since MS Diagnosis (years) | Relapses Within Previous 2 Years | Relapses Within Previous 1 Year | Number of Gd+ Lesions | Volume of T2 Lesions (cm <sup>3</sup> ) |
| DEFINE                   | PBO              | 408         | 38.5                                  | 2.5        | 75%              | 42%                         | NR                                   | 5.8                             | NR                               | 1.3                             | 1.6                   | NR                                      |
|                          | DMF              | 410         | 38.1                                  | 2.4        | 72%              | 40%                         | NR                                   | 5.6                             | NR                               | 1.3                             | 1.2                   | NR                                      |
| Etemadifar et al. (2006) | INFB-1b SC       | 30          | NR                                    | 1.9        | 70%              | NR                          | NR                                   | 3.7                             | NR                               | 2.2                             | NR                    | NR                                      |
|                          | IFNB-1a IM       | 30          | NR                                    | 1.9        | 80%              | NR                          | NR                                   | 2.9                             | NR                               | 2.0                             | NR                    | NR                                      |
|                          | IFNB-1a SC 44 µg | 30          | NR                                    | 2.1        | 77%              | NR                          | NR                                   | 3.0                             | NR                               | 2.4                             | NR                    | NR                                      |
| EVIDENCE                 | IFNB-1a IM       | 338         | 37.4                                  | 2.4        | 74% <sup>c</sup> | NR                          | 6.5 <sup>c</sup>                     | NR                              | 2.6 <sup>c</sup>                 | NR                              | 2.7 <sup>c</sup>      | NR                                      |
|                          | IFNB-1a SC 44 µg | 339         | 38.3                                  | 2.3        | 75% <sup>c</sup> | NR                          | 6.4 <sup>c</sup>                     | NR                              | 2.7 <sup>c</sup>                 | NR                              | 2.0 <sup>c</sup>      | NR                                      |
| FREEDOMS                 | PBO              | 418         | 37.2                                  | 2.5        | 71%              | 40%                         | 8.1                                  | NR                              | 2.2                              | 1.4                             | 1.3                   | 6.2                                     |
|                          | FIN              | 425         | 36.6                                  | 2.3        | 70%              | 43%                         | 8.0                                  | NR                              | 2.1                              | 1.5                             | 1.6                   | 6.1                                     |
| FREEDOMS II              | PBO              | 355         | 40.1                                  | 2.4        | 81%              | 73%                         | 10.6                                 | NR                              | 2.2                              | 1.5                             | 1.2                   | 5.6                                     |
|                          | FIN              | 358         | 40.6                                  | 2.4        | 77%              | 74%                         | 10.4                                 | NR                              | 2.2                              | 1.4                             | 1.3                   | 5.5                                     |
| GALA                     | PBO              | 461         | 38.1                                  | 2.7        | 68%              | 14%                         | 7.6                                  | NR                              | 1.9                              | 1.3                             | 1.4                   | 17.4                                    |
|                          | GA 40 mg         | 943         | 37.4                                  | 2.8        | 68%              | 14%                         | 7.7                                  | NR                              | 1.9                              | 1.3                             | 1.7                   | 19.7                                    |
| GOLDEN                   | IFNB-1b SC       | 28          | 37.6                                  | 2.1        | 68%              | 46%                         | NR                                   | 4.7                             | 1.5                              | 1.2                             | 0.9                   | 7.5                                     |
|                          | FIN              | 80          | 40.2                                  | 2.8        | 71%              | 53%                         | NR                                   | 5.0                             | 1.9                              | 1.5                             | 0.8                   | 10.8                                    |
| IFNB MS                  | PBO              | 123         | 36.0                                  | 2.8        | 72%              | NR                          | NR                                   | 3.9                             | 3.6                              | NR                              | NR                    | NR                                      |
|                          | IFNB-1b SC       | 124         | 35.2                                  | 3.0        | 69%              | NR                          | NR                                   | 4.7                             | 3.4                              | NR                              | NR                    | NR                                      |
| INCOMIN                  | IFNB-1a IM       | 92          | 34.9                                  | 2.0        | 62%              | NR                          | NR                                   | 6.7                             | 2.8                              | NR                              | NR                    | NR                                      |
|                          | IFNB-1b SC       | 96          | 38.8                                  | 2.0        | 69%              | NR                          | NR                                   | 5.9                             | 3.0                              | NR                              | NR                    | NR                                      |
| MSCRG                    | PBO              | 143         | 36.9                                  | 2.3        | 72%              | NR                          | NR                                   | 6.4                             | NR                               | NR                              | 2.3                   | NR                                      |
|                          | IFNB-1a IM       | 158         | 36.7                                  | 2.4        | 75%              | NR                          | NR                                   | 6.6                             | NR                               | NR                              | 3.2                   | NR                                      |
| OPERA I                  | IFNB-1a SC 44 µg | 411         | 36.9                                  | 2.8        | 66%              | NR                          | 6.3                                  | 3.7                             | NR                               | 1.3                             | NR                    | 9.7                                     |
|                          | OCR              | 410         | 37.1                                  | 2.9        | 66%              | NR                          | 6.7                                  | 3.8                             | NR                               | 1.3                             | NR                    | 10.8                                    |
| OPERA II                 | IFNB-1a SC 44 µg | 418         | 37.4                                  | 2.8        | 67%              | NR                          | 6.7                                  | 4.1                             | NR                               | 1.3                             | NR                    | 10.6                                    |
|                          | OCR              | 417         | 37.2                                  | 2.8        | 65%              | NR                          | 6.7                                  | 4.2                             | NR                               | 1.3                             | NR                    | 10.7                                    |
| OPTIMUM                  | TER 14 mg        | 566         | 36.8                                  | 2.6        | 66%              | NR                          | 7.7                                  | NR                              | NR                               | 1.3                             | NR                    | 9.5                                     |
|                          | PON              | 567         | 36.7                                  | 2.6        | 64%              | NR                          | 7.6                                  | NR                              | NR                               | 1.2                             | NR                    | 8.3                                     |
| PRISMS                   | PBO              | 187         | NR                                    | 2.4        | 75%              | NR                          | NR                                   | NR                              | 3.0                              | NR                              | NR                    | NR                                      |
|                          | IFNB-1a SC 22 µg | 189         | NR                                    | 2.5        | 67%              | NR                          | NR                                   | NR                              | 3.0                              | NR                              | NR                    | NR                                      |
|                          | IFNB-1a SC 44 µg | 184         | NR                                    | 2.5        | 66%              | NR                          | NR                                   | NR                              | 3.0                              | NR                              | NR                    | NR                                      |
| RADIANCE-B               | IFNB-1a IM       | 441         | 35.1                                  | 2.5        | 69%              | 29%                         | 6.4                                  | 3.6                             | 1.8                              | 1.3                             | 1.8                   | 11.5                                    |
|                          | OZN              | 433         | 36.0                                  | 2.6        | 67%              | 28%                         | 6.9                                  | 4.0                             | 1.7                              | 1.3                             | 1.6                   | 11.6                                    |
| REGARD                   | IFNB-1a SC 44 µg | 386         | 36.7                                  | 2.4        | 69%              | NR                          | NR                                   | NR                              | NR                               | NR                              | 1.5                   | 7.9                                     |
|                          | GA 20 mg         | 378         | 36.8                                  | 2.3        | 72%              | NR                          | NR                                   | NR                              | NR                               | NR                              | 1.7                   | 7.6                                     |

| Trial Name            | Treatment        | Sample Size | Baseline Characteristics <sup>a</sup> |            |            |                             |                                      |                                 |                                  |                                 |                       |                                         |
|-----------------------|------------------|-------------|---------------------------------------|------------|------------|-----------------------------|--------------------------------------|---------------------------------|----------------------------------|---------------------------------|-----------------------|-----------------------------------------|
|                       |                  |             | Age (years)                           | EDSS Score | Female (%) | Previous DMT Experience (%) | Time Since First MS Symptoms (years) | Time Since MS Diagnosis (years) | Relapses Within Previous 2 Years | Relapses Within Previous 1 Year | Number of Gd+ Lesions | Volume of T2 Lesions (cm <sup>3</sup> ) |
| Stepien et al. (2013) | IFNB-1a IM       | 20          | 32.6                                  | 2.3        | 65%        | NR                          | NR                                   | 1.6                             | NR                               | 1.2                             | NR                    | NR                                      |
|                       | IFNB-1b SC       | 18          | 33.5                                  | 2.1        | 72%        | NR                          | NR                                   | 1.9                             | NR                               | 1.5                             | NR                    | NR                                      |
| SUNBEAM               | IFNB-1a IM       | 448         | 35.9                                  | 2.6        | 67%        | 34%                         | 6.9                                  | 3.7                             | 1.7                              | 1.3                             | 1.7                   | 13.6                                    |
|                       | OZN              | 447         | 34.8                                  | 2.6        | 63%        | 29%                         | 6.9                                  | 3.6                             | 1.8                              | 1.3                             | 1.8                   | 12.5                                    |
| TEMSO                 | PBO              | 363         | 38.4                                  | 2.7        | 76%        | NR                          | 8.6                                  | NR                              | 2.2                              | 1.4                             | 1.7                   | NR                                      |
|                       | TER 7 mg         | 366         | 37.4                                  | 2.7        | 70%        | NR                          | 8.8                                  | NR                              | 2.3                              | 1.4                             | 1.5                   | NR                                      |
|                       | TER 14 mg        | 359         | 37.8                                  | 2.7        | 71%        | NR                          | 8.7                                  | NR                              | 2.2                              | 1.3                             | 1.8                   | NR                                      |
| TENERE                | IFNB-1a SC 44 µg | 104         | 37.0                                  | 2.0        | 68%        | NR                          | 7.7                                  | NR                              | 1.7                              | 1.2                             | NR                    | NR                                      |
|                       | TER 7 mg         | 109         | 35.2                                  | 2.0        | 64%        | NR                          | 7.0                                  | NR                              | 1.7                              | 1.3                             | NR                    | NR                                      |
|                       | TER 14 mg        | 111         | 36.8                                  | 2.3        | 70%        | NR                          | 6.6                                  | NR                              | 1.7                              | 1.4                             | NR                    | NR                                      |
| TOWER                 | PBO              | 389         | 38.1                                  | 2.7        | 70%        | NR                          | 7.6                                  | NR                              | 2.1                              | 1.4                             | NR                    | NR                                      |
|                       | TER 7 mg         | 408         | 37.4                                  | 2.7        | 74%        | NR                          | 8.2                                  | NR                              | 2.1                              | 1.4                             | NR                    | NR                                      |
|                       | TER 14 mg        | 372         | 38.2                                  | 2.7        | 69%        | NR                          | 8.2                                  | NR                              | 2.1                              | 1.4                             | NR                    | NR                                      |
| TRANSFORMS            | IFNB-1a IM       | 435         | 36.0                                  | 2.2        | 68%        | 56%                         | 7.4                                  | 4.9                             | 2.3                              | 1.5                             | 1.1                   | 4.9                                     |
|                       | FIN              | 431         | 36.7                                  | 2.2        | 65%        | 55%                         | 7.5                                  | 4.8                             | 2.3                              | 1.5                             | 1.0                   | 5.2                                     |
| ULTIMATE I            | TER 14 mg        | 274         | 37.0                                  | 2.9        | 65%        | 41%                         | 6.8                                  | 4.5                             | 2.0                              | 1.4                             | 1.6                   | 14.9                                    |
|                       | UTX              | 271         | 36.2                                  | 3.0        | 61%        | 40%                         | 7.5                                  | 4.9                             | 1.8                              | 1.3                             | 2.3                   | 15.9                                    |
| ULTIMATE II           | TER 14 mg        | 272         | 36.2                                  | 3.0        | 65%        | 43%                         | 7.4                                  | 5.0                             | 1.8                              | 1.2                             | 2.5                   | 15.7                                    |
|                       | UTX              | 272         | 34.5                                  | 2.8        | 65%        | 49%                         | 7.3                                  | 5.0                             | 1.8                              | 1.3                             | 2.6                   | 14.7                                    |

<sup>a</sup> Unless otherwise stated value is the mean.

<sup>b</sup> Overall value (not available by treatment).

<sup>c</sup> Value is from Coyle et al. (2017) [92] because it was not reported in the pivotal publication for the trial [19].

*ALE* alemtuzumab, *CLA* cladribine, *DMF* dimethyl fumarate, *DMT* disease-modifying therapy, *EDSS* Expanded Disability Status Scale, *FIN* fingolimod, *GA* glatiramer acetate, *Gd+* gadolinium enhancing, *IFNB* interferon beta, *IM* intramuscular, *MS* multiple sclerosis, *NAT* natalizumab, *OCR* ocrelizumab, *OMB* ofatumumab, *OZN* ozanimod, *PBO* placebo, *PEG* pegylated interferon beta-1a, *PON* ponesimod, *SC* subcutaneous, *TER* teriflunomide, *UTX* ublituximab.

**Table B.4. Summary of relapse definitions.**

| Definition                                                                                    | Trials Using Definition                                                                                                                                                                                                                                                                   |
|-----------------------------------------------------------------------------------------------|-------------------------------------------------------------------------------------------------------------------------------------------------------------------------------------------------------------------------------------------------------------------------------------------|
| New/recurrent/worsening neurological symptoms/abnormalities that lasted for at least 24 hours | ADVANCE; AFFIRM; ASCLEPIOS I/II; ASSESS; BEYOND; CLARITY; CombiRx; CONFIRM; DEFINE; Etemadifar et al. (2006); EVIDENCE; FREEDOMS; FREEDOMS II; IFNB MS; INCOMIN; OPERA I/II; OPTIMUM; PRISMS; RADIANCE-B; Stepien et al. (2013); SUNBEAM; TEMSO; TENERE; TOWER; TRANSFORMS; ULTIMATE I/II |
| New/recurrent/worsening neurological symptoms/abnormalities that lasted for at least 48 hours | Bornstein et al. (1987); BRAVO; CAMMS223; CARE-MS I; CARE-MS II; Copolymer 1 MS trial; GALA; MSCRG; REGARD                                                                                                                                                                                |

Note: Relapse definition not reported for Boiko et al. (2018); Calabrese et al. (2012); and GOLDEN.

Note: Trials were sorted by the required duration of relapse symptoms. Relapse definitions additionally varied between trials in numerous minor ways.

**Table B.5. Summary of ARR definitions.**

| Definition                                                                                                                                                                                         | Trials Using Definition                                      |
|----------------------------------------------------------------------------------------------------------------------------------------------------------------------------------------------------|--------------------------------------------------------------|
| Total number of relapses divided by the total number of patient-years in the study                                                                                                                 | ADVANCE; AFFIRM; CombiRx; CONFIRM; DEFINE; MSCRG; OPERA I/II |
| Estimated using a negative binomial model with the cumulative number of confirmed relapses by patient as the response variable and the natural log of time in study in years as an offset variable | ASCLEPIOS I/II                                               |
| Total number of confirmed relapses divided by the total days in the study multiplied by 365.25                                                                                                     | ASSESS; CLARITY; FREEDOMS II; RADIANCE-B; SUNBEAM            |
| Estimated using a negative binomial model with the total number of confirmed relapses on-study                                                                                                     | BRAVO                                                        |
| Estimated using a Poisson regression model with the number of relapses as the dependent variable and the log total amount of follow-up for each patient as an offset variable                      | CAMMS223                                                     |
| Estimated using a negative binomial model with the total number of relapses by patients as the dependent variable and the log total amount of follow-up for each patient as an offset variable     | CARE-MS I; CARE-MS II                                        |
| Relapses per patient per time on study                                                                                                                                                             | EVIDENCE                                                     |
| Number of confirmed relapses per year                                                                                                                                                              | FREEDOMS                                                     |
| Cumulative number of confirmed relapses divided by the number of person-years of exposure to treatment                                                                                             | GALA                                                         |
| Number of confirmed relapses per subject-year                                                                                                                                                      | OPTIMUM                                                      |
| Total number of relapses across all patients divided by the total time on study across all patients                                                                                                | REGARD                                                       |
| Total number of confirmed relapses that occurred during the treatment period divided by the sum of the treatment durations                                                                         | TEMSO; TENERE; TOWER; ULTIMATE I/II                          |
| The number of confirmed relapses during a 12-month period                                                                                                                                          | TRANSFORMS                                                   |

Note: ARR was not reported for Boiko et al. (2018), Bornstein et al. (1987); Etemadifar et al. (2006); and PRISMS. However, ARR could be calculated for these trials using other reported data.

Note: ARR definition not reported for BEYOND; Calabrese et al. (2012); Copolymer 1 MS trial; GOLDEN; IFNB MS; INCOMIN; and Stepien et al. (2013).

ARR annualised relapse rate.

**Table B.6. Summary of 3mCDP definitions.**

| Trial Name              | Definition                                                                                                                                                                                                                                                                                                                                   | Baseline EDSS Score Range | Required Increase in EDSS Score From Baseline for Progression |                                        |                                       |                      |
|-------------------------|----------------------------------------------------------------------------------------------------------------------------------------------------------------------------------------------------------------------------------------------------------------------------------------------------------------------------------------------|---------------------------|---------------------------------------------------------------|----------------------------------------|---------------------------------------|----------------------|
|                         |                                                                                                                                                                                                                                                                                                                                              |                           | Baseline Score = 0                                            | Baseline Score = 1 to 5                | Baseline Score = 5.5                  | Baseline Score > 5.5 |
| ADVANCE                 | ≥1.0-point increase on the EDSS from a baseline EDSS ≥1.0 sustained for 12 weeks or at least a 1.5-point increase on the EDSS from a baseline EDSS of 0 sustained for 12 weeks.                                                                                                                                                              | 0.0–5.0                   | 1.5                                                           | 1.0                                    | NA                                    | NA                   |
| AFFIRM                  | An increase of 1.0 or more on the EDSS from a baseline score of 1.0 or more or an increase of 1.5 or more from a baseline score of 0 that was sustained for 12 weeks (progression could not be confirmed during a relapse).                                                                                                                  | 0.0–5.0                   | 1.5                                                           | 1.0                                    | NA                                    | NA                   |
| ASCLEPIOS I/II          | An increase in EDSS score of at least 1.5 points if baseline score was 0, of at least 1 point if baseline score was 1–5 or of at least 0.5 points if baseline score was at least 5.5, sustained for at least 3 months. <sup>a</sup>                                                                                                          | 0.0–5.5                   | 1.5                                                           | 1.0                                    | 0.5                                   | NA                   |
| BEYOND                  | A 1-point change in the score that was sustained for 3 months.                                                                                                                                                                                                                                                                               | 0.0–5.0                   | 1.0                                                           | 1.0                                    | NA                                    | NA                   |
| Bornstein et al. (1987) | An increase of at least 1 unit in the Kurtzke score that was maintained for at least 3 months.                                                                                                                                                                                                                                               | 0.0–6.0                   | 1.0                                                           | 1.0                                    | 1.0                                   | 1.0                  |
| BRAVO                   | A 1.0 point increase in EDSS score if baseline score was between 0 and 5.0, or a 0.5 point increase if baseline score was 5.5, sustained for 3 months.                                                                                                                                                                                       | 0.0–5.5                   | 1.0                                                           | 1.0                                    | 0.5                                   | NA                   |
| CAMMS223                | An increase of at least 1.5 points for patients with a baseline score of 0 and of at least 1.0 point for patients with a baseline score of 1.0 or more; all scores were confirmed twice during a 6-month period. The onset of a sustained level of disability was timed to the first recorded increase in the EDSS score aside from relapse. | 0.0–3.0                   | 1.5                                                           | 1.0 (baseline EDSS score = 1.0 to 3.0) | NA                                    | NA                   |
| CLARITY                 | Time to a sustained increase (for at least 3 months) of at least 1 point in the EDSS score or an increase of at least 1.5 points if the baseline EDSS score was 0. <sup>b</sup>                                                                                                                                                              | 0.0–5.5                   | 1.5                                                           | 1.0 (baseline EDSS score = 0.5 to 4.5) | 1.0 or 0.5 (baseline EDSS score ≥5.0) | NA                   |
| CONFIRM                 | An increase in the EDSS score of at least 1.0 point in patients with a baseline score of 1.0 or more or an increase of at least 1.5 points in patients with a baseline score of 0, confirmed at least 12 weeks later.                                                                                                                        | 0.0–5.0                   | 1.5                                                           | 1.0                                    | NA                                    | NA                   |
| Copolymer 1 MS trial    | An increase of at least one full step on the EDSS that persisted for at least 3 months.                                                                                                                                                                                                                                                      | 0.0–5.0                   | 1.0                                                           | 1.0                                    | NA                                    | NA                   |
| DEFINE                  | At least a 1.0-point increase on the EDSS in patients with a baseline score of 1.0 or higher or at least a 1.5-point increase in patients with a baseline score of 0, with the increased score sustained for at least 12 weeks.                                                                                                              | 0.0–5.0                   | 1.5                                                           | 1.0                                    | NA                                    | NA                   |
| EVIDENCE                | Progression by one point on the EDSS scale confirmed at a visit 3 or 6 months later without an intervening EDSS value that would not meet the criteria for progression.                                                                                                                                                                      | 0.0–5.5                   | 1.0                                                           | 1.0                                    | 1.0                                   | NA                   |

| Trial Name    | Definition                                                                                                                                                                                                                                                                                        | Baseline EDSS Score Range | Required Increase in EDSS Score From Baseline for Progression |                         |                      |                      |
|---------------|---------------------------------------------------------------------------------------------------------------------------------------------------------------------------------------------------------------------------------------------------------------------------------------------------|---------------------------|---------------------------------------------------------------|-------------------------|----------------------|----------------------|
|               |                                                                                                                                                                                                                                                                                                   |                           | Baseline Score = 0                                            | Baseline Score = 1 to 5 | Baseline Score = 5.5 | Baseline Score > 5.5 |
| FREEDOMS      | An increase of one point in the EDSS score (or half a point if the baseline EDSS score was equal to 5.5), confirmed after 3 months, with an absence of relapse at the time of assessment and with all EDSS scores measured during that time meeting the criteria for disability progression.      | 0.0–5.5                   | 1.0                                                           | 1.0                     | 0.5                  | NA                   |
| FREEDOMS II   | A 1 point EDSS increase from baseline or 0.5 point increase if baseline EDSS is $\geq 5.5$ , confirmed 3 months later.                                                                                                                                                                            | 0.0–5.5                   | 1.0                                                           | 1.0                     | 0.5                  | NA                   |
| IFNB MS       | Two consecutive EDSS scores, separated by 90 days, that were identical, with both showing a 1.0 point increase over the baseline score.                                                                                                                                                           | 0.0–5.5                   | 1.0                                                           | 1.0                     | 1.0                  | NA                   |
| OPERA I/II    | An increase from the baseline EDSS score of at least 1.0 point (or 0.5 points if the baseline EDSS score was $>5.5$ ) that was sustained for at least 12 weeks.                                                                                                                                   | 0.0–5.5                   | 1.0                                                           | 1.0                     | 1.0                  | NA                   |
| OPTIMUM       | An increase in the EDSS score, which was confirmed after 12 weeks (by an increase of at least 1.5 with a baseline EDSS score of 0.0, at least 1.0 with baseline EDSS score of 1.0 to 5.0, or at least 0.5 with a baseline EDSS score of 5.5 or more)                                              | 0.0–5.5                   | 1.5                                                           | 1.0                     | 0.5                  | NA                   |
| PRISMS        | An increase in EDSS of at least 1 point sustained over at least 3 months.                                                                                                                                                                                                                         | 0.0–5.0                   | 1.0                                                           | 1.0                     | NA                   | NA                   |
| RADIANCE-B    | EDSS worsening of $\geq 1$ -point increase, confirmed after 3 months.                                                                                                                                                                                                                             | 0.0–5.0                   | 1.0                                                           | 1.0                     | NA                   | NA                   |
| SUNBEAM       | EDSS worsening of $\geq 1$ -point increase, confirmed after 3 months.                                                                                                                                                                                                                             | 0.0–5.0                   | 1.0                                                           | 1.0                     | NA                   | NA                   |
| TEMPO         | An increase from baseline of at least 1.0 point in the EDSS score (or at least 0.5 points for patients with a baseline EDSS score greater than 5.5) that persisted for at least 12 weeks.                                                                                                         | 0.0–5.5                   | 1.0                                                           | 1.0                     | 1.0                  | NA                   |
| TOWER         | An increase from baseline of at least 1 EDSS point (or $\geq 0.5$ points when baseline EDSS score was $>5.5$ points) that persisted for at least 12 weeks. For clarification, a score of 5.5 points or more could occur in patients whose EDSS score deteriorated between screening and baseline. | 0.0–5.5                   | 1.0                                                           | 1.0                     | 1.0                  | NA                   |
| TRANSFORMS    | A 1.0-point increase in EDSS score (0.5-point increase for baseline EDSS score $\geq 5.5$ ), confirmed 3 months later in the absence of relapse.                                                                                                                                                  | 0.0–5.5                   | 1.0                                                           | 1.0                     | 0.5                  | NA                   |
| ULTIMATE I/II | An increase in EDSS at least 1 point higher than the baseline EDSS if the baseline EDSS is $\leq 5.5$ or at least 0.5 higher than the baseline EDSS if the baseline EDSS is $>5.5$ .                                                                                                              | 0.0–5.5                   | 1.0                                                           | 1.0                     | 1.0                  | NA                   |

<sup>a</sup> Predefined (per-protocol) definition for ASCLEPIOS I/II.

<sup>b</sup> Definition on ClinicalTrials.gov for the CLARITY trial differs from the pivotal publication (the trial record additionally specifies an increase of 0.5 required for baseline EDSS score 5 or greater).

*3mCDP* 3-month confirmed disability progression, *EDSS* Expanded Disability Status Scale, *NA* not applicable.

**Table B.7. Summary of 6mCDP definitions.**

| Trial Name     | Definition                                                                                                                                                                                                                                                                                                                                       | Baseline EDSS Score Range | Required Increase in EDSS Score From Baseline for Progression |                                        |                                              |                      |
|----------------|--------------------------------------------------------------------------------------------------------------------------------------------------------------------------------------------------------------------------------------------------------------------------------------------------------------------------------------------------|---------------------------|---------------------------------------------------------------|----------------------------------------|----------------------------------------------|----------------------|
|                |                                                                                                                                                                                                                                                                                                                                                  |                           | Baseline Score = 0                                            | Baseline Score = 1 to 5                | Baseline Score = 5.5                         | Baseline Score > 5.5 |
| ADVANCE        | At least a 1 point increase from baseline EDSS $\geq 1$ or 1.5 point increase for patients with baseline EDSS of 0, sustained for 24 weeks. <sup>a</sup>                                                                                                                                                                                         | 0.0–5.0                   | 1.5                                                           | 1.0                                    | NA                                           | NA                   |
| AFFIRM         | An increase of 1.0 or more on the EDSS from a baseline score of 1.0 or more or an increase of 1.5 or more from a baseline score of 0 that was sustained for 24 weeks (progression could not be confirmed during a relapse).                                                                                                                      | 0.0–5.0                   | 1.5                                                           | 1.0                                    | NA                                           | NA                   |
| ASCLEPIOS I/II | An increase in EDSS score of at least 1.5 points if baseline score was 0, of at least 1 point if baseline score was 1-5, or of at least 0.5 points if baseline score was at least 5.5, sustained for at least 6 months. <sup>b</sup>                                                                                                             | 0.0–5.5                   | 1.5                                                           | 1.0                                    | 0.5                                          | NA                   |
| BRAVO          | A 1.0 point increase in EDSS score if baseline score was between 0 and 5.0, or a 0.5 point increase if baseline score was 5.5, sustained for 6 months.                                                                                                                                                                                           | 0.0–5.5                   | 1.0                                                           | 1.0                                    | 0.5                                          | NA                   |
| CAMMS223       | An increase of at least 1.5 points for patients with a baseline score of 0 and of at least 1.0 point for patients with a baseline score of 1.0 or more; all scores were confirmed twice during a 6-month period. The onset of a sustained level of disability was timed to the first recorded increase in the EDSS score aside from relapse.     | 0.0–3.0                   | 1.5                                                           | 1.0 (baseline EDSS score = 1.0 to 3.0) | NA                                           | NA                   |
| CARE-MS I      | An increase from baseline of at least one EDSS point (or $\geq 1.5$ points if baseline EDSS score was 0) confirmed over 6 months.                                                                                                                                                                                                                | 0.0–3.0                   | 1.5                                                           | 1.0 (baseline EDSS score = 1.0 to 3.0) | NA                                           | NA                   |
| CARE-MS II     | An increase from baseline of at least one EDSS point (or $\geq 1.5$ points if the baseline EDSS score was 0) confirmed over 6 months.                                                                                                                                                                                                            | 0.0–5.0                   | 1.5                                                           | 1.0                                    | NA                                           | NA                   |
| CLARITY        | Definition for 6-month CDP was not reported, so definition was assumed to match that reported for time to 3mCDP with regards to required increase in EDSS score: Time to a sustained increase (for at least 3 months) of at least 1 point in the EDSS score or an increase of at least 1.5 points if the baseline EDSS score was 0. <sup>c</sup> | 0.0–5.5                   | 1.5                                                           | 1.0 (baseline EDSS score = 0.5 to 4.5) | 1.0 or 0.5 (baseline EDSS score $\geq 5.0$ ) | NA                   |
| CombiRx        | A 1.0 increase in the EDSS from baseline, when baseline $\leq 5.0$ ; or an increase of 0.5 from baseline, when baseline $\geq 5.5$ , sustained for 6 months (2 successive quarterly visits) as assessed by the blinded EDSS examiner and confirmed centrally.                                                                                    | 0.0–5.5                   | 1.0                                                           | 1.0                                    | 0.5                                          | NA                   |
| CONFIRM        | A $\geq 1.0$ point increase on the EDSS from a baseline EDSS score $\geq 1.0$ that was confirmed at least 24 weeks later, or a $\geq 1.5$ point increase on the EDSS from a baseline EDSS score = 0 that was confirmed at least 24 weeks later. <sup>a</sup>                                                                                     | 0.0–5.0                   | 1.5                                                           | 1.0                                    | NA                                           | NA                   |

| Trial Name  | Definition                                                                                                                                                                                                                                                                                                                                                      | Baseline EDSS Score Range | Required Increase in EDSS Score From Baseline for Progression |                                           |                      |                      |
|-------------|-----------------------------------------------------------------------------------------------------------------------------------------------------------------------------------------------------------------------------------------------------------------------------------------------------------------------------------------------------------------|---------------------------|---------------------------------------------------------------|-------------------------------------------|----------------------|----------------------|
|             |                                                                                                                                                                                                                                                                                                                                                                 |                           | Baseline Score = 0                                            | Baseline Score = 1 to 5                   | Baseline Score = 5.5 | Baseline Score > 5.5 |
| DEFINE      | A $\geq 1.0$ point increase on the EDSS from a baseline EDSS score $\geq 1.0$ that was confirmed at least 24 weeks later, or a $\geq 1.5$ point increase on the EDSS from a baseline EDSS score = 0 that was confirmed at least 24 weeks later. <sup>a</sup>                                                                                                    | 0.0–5.0                   | 1.5                                                           | 1.0                                       | NA                   | NA                   |
| EVIDENCE    | Progression by one point on the EDSS scale confirmed at a visit 3 or 6 months later without an intervening EDSS value that would not meet the criteria for progression.                                                                                                                                                                                         | 0.0–5.5                   | 1.0                                                           | 1.0                                       | 1.0                  | NA                   |
| FREEDOMS    | An increase of one point in the EDSS score (or half a point if the baseline EDSS score was equal to 5.5), confirmed after 6 months, with an absence of relapse at the time of assessment and with all EDSS scores measured during that time meeting the criteria for disability progression.                                                                    | 0.0–5.5                   | 1.0                                                           | 1.0                                       | 0.5                  | NA                   |
| FREEDOMS II | A 1 point EDSS increase from baseline or 0.5 point increase if baseline EDSS is $\geq 5.5$ , confirmed 6 months later.                                                                                                                                                                                                                                          | 0.0–5.5                   | 1.0                                                           | 1.0                                       | 0.5                  | NA                   |
| INCOMIN     | An increase in EDSS of at least one point sustained for at least 6 months and confirmed at the end of follow-up.                                                                                                                                                                                                                                                | 1.0–3.5                   | NA                                                            | 1.0<br>(baseline EDSS score = 1.0 to 3.5) | NA                   | NA                   |
| MSCRG       | Deterioration from baseline by at least 1.0 point on the EDSS persisting for at least 6 months.                                                                                                                                                                                                                                                                 | 1.0–3.5                   | NA                                                            | 1.0<br>(baseline EDSS score = 1.0 to 3.5) | NA                   | NA                   |
| OPERA I/II  | An increase from the baseline EDSS score of at least 1.0 point (or 0.5 points if the baseline EDSS score was $>5.5$ ) that was sustained for at least 24 weeks.                                                                                                                                                                                                 | 0.0–5.5                   | 1.0                                                           | 1.0                                       | 1.0                  | NA                   |
| OPTIMUM     | An increase in the EDSS score, which was confirmed after 24 weeks (by an increase of at least 1.5 with a baseline EDSS score of 0.0, at least 1.0 with baseline EDSS score of 1.0 to 5.0, or at least 0.5 with a baseline EDSS score of 5.5 or more)                                                                                                            | 0.0–5.5                   | 1.5                                                           | 1.0                                       | 0.5                  | NA                   |
| RADIANCE-B  | EDSS worsening of $\geq 1$ -point increase, confirmed after 6 months.                                                                                                                                                                                                                                                                                           | 0.0–5.0                   | 1.0                                                           | 1.0                                       | NA                   | NA                   |
| REGARD      | Disability progression at the 6-month follow-up visit was confirmed as follows: if the EDSS score at baseline was 0, then a change of 1.5 points or more was required; if the EDSS was 0.5–4.5 at baseline, then a change of 1.0 point or more was required; and if the EDSS at baseline was 5 points or more, then the change required was 0.5 points or more. | 0.0–5.5                   | 1.5                                                           | 1.0<br>(baseline EDSS score = 0.5 to 4.5) | 0.5                  | NA                   |
| SUNBEAM     | EDSS worsening of $\geq 1$ -point increase, confirmed after 6 months.                                                                                                                                                                                                                                                                                           | 0.0–5.0                   | 1.0                                                           | 1.0                                       | NA                   | NA                   |

| Trial Name    | Definition                                                                                                                                                                                                                                                                                     | Baseline EDSS Score Range | Required Increase in EDSS Score From Baseline for Progression |                         |                      |                      |
|---------------|------------------------------------------------------------------------------------------------------------------------------------------------------------------------------------------------------------------------------------------------------------------------------------------------|---------------------------|---------------------------------------------------------------|-------------------------|----------------------|----------------------|
|               |                                                                                                                                                                                                                                                                                                |                           | Baseline Score = 0                                            | Baseline Score = 1 to 5 | Baseline Score = 5.5 | Baseline Score > 5.5 |
| TEMPO         | At least 1 point increase on EDSS score from baseline, if the baseline EDSS score was $\leq 5.5$ , or time to at least 0.5 increase on EDSS score from baseline, if the baseline EDSS score was $> 5.5$ ; this increase in EDSS score was to be persistent for at least 24 weeks. <sup>a</sup> | 0.0–5.5                   | 1.0                                                           | 1.0                     | 1.0                  | NA                   |
| TOWER         | At least 1 point increase on EDSS score from baseline, if the baseline EDSS score was $\leq 5.5$ , or time to at least 0.5 increase on EDSS score from baseline, if the baseline EDSS score was $> 5.5$ ; this increase in EDSS score was to be persistent for at least 24 weeks. <sup>a</sup> | 0.0–5.5                   | 1.0                                                           | 1.0                     | 1.0                  | NA                   |
| ULTIMATE I/II | An increase in EDSS at least 1 point higher than the baseline EDSS if the baseline EDSS is $\leq 5.5$ or at least 0.5 higher than the baseline EDSS if the baseline EDSS is $> 5.5$ .                                                                                                          | 0.0–5.5                   | 1.0                                                           | 1.0                     | 1.0                  | NA                   |

<sup>a</sup> Definition not found in the pivotal trial publication, so referred to a Summary of Product Characteristics or EMA assessment report associated with the trial.

<sup>b</sup> Predefined (per-protocol) definition for ASCLEPIOS I/II.

<sup>c</sup> Definition on ClinicalTrials.gov for the CLARITY trial differs from the pivotal publication (the trial record additionally specifies an increase of 0.5 required for baseline EDSS score 5 or greater).

*6mCDP* 6-month confirmed disability progression, *EDSS* Expanded Disability Status Scale, *EMA* European Medicines Agency, *NA* not applicable.

### Placebo Arm ARR

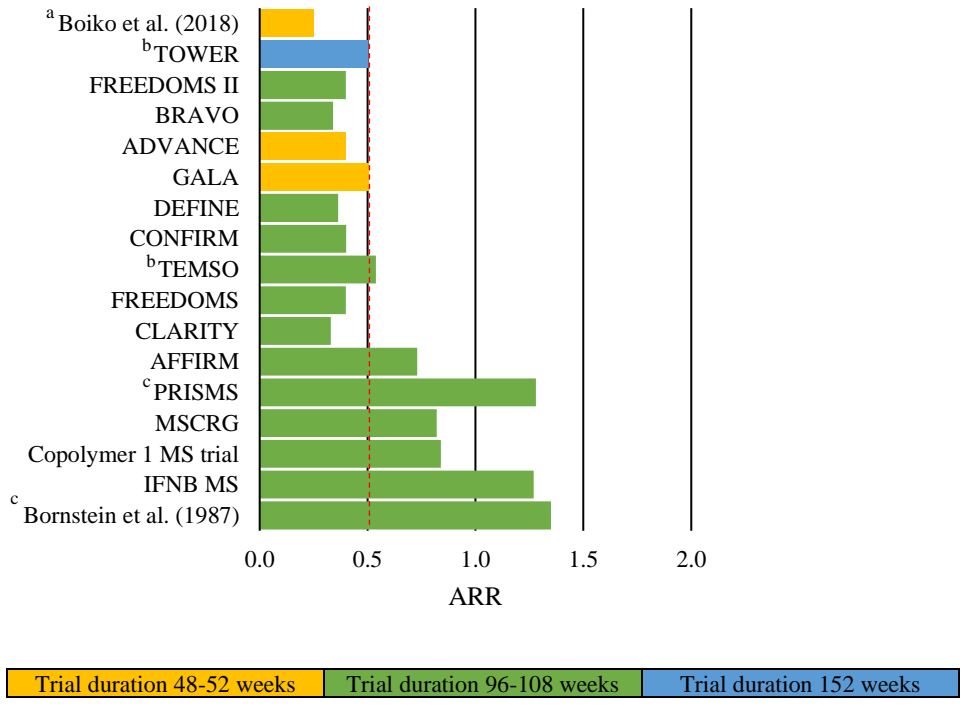

**Figure B.1. Placebo response by trial for ARR.**

<sup>a</sup> Calculated by dividing total exacerbations by number of patients multiplied by trial duration in years.

<sup>b</sup> Value to three decimal places obtained from an European Medicines Agency report [93].

<sup>c</sup> Calculated by dividing relapses per patient (over 2 years) by 2.

Note: Trials are ordered by pivotal publication year with the most recent at the top.

Note: Where bars are not shown, data was not reported.

Note: Red dashed line is the mean weighted by sample size (ARR: 0.51).

ARR annualised relapse rate.

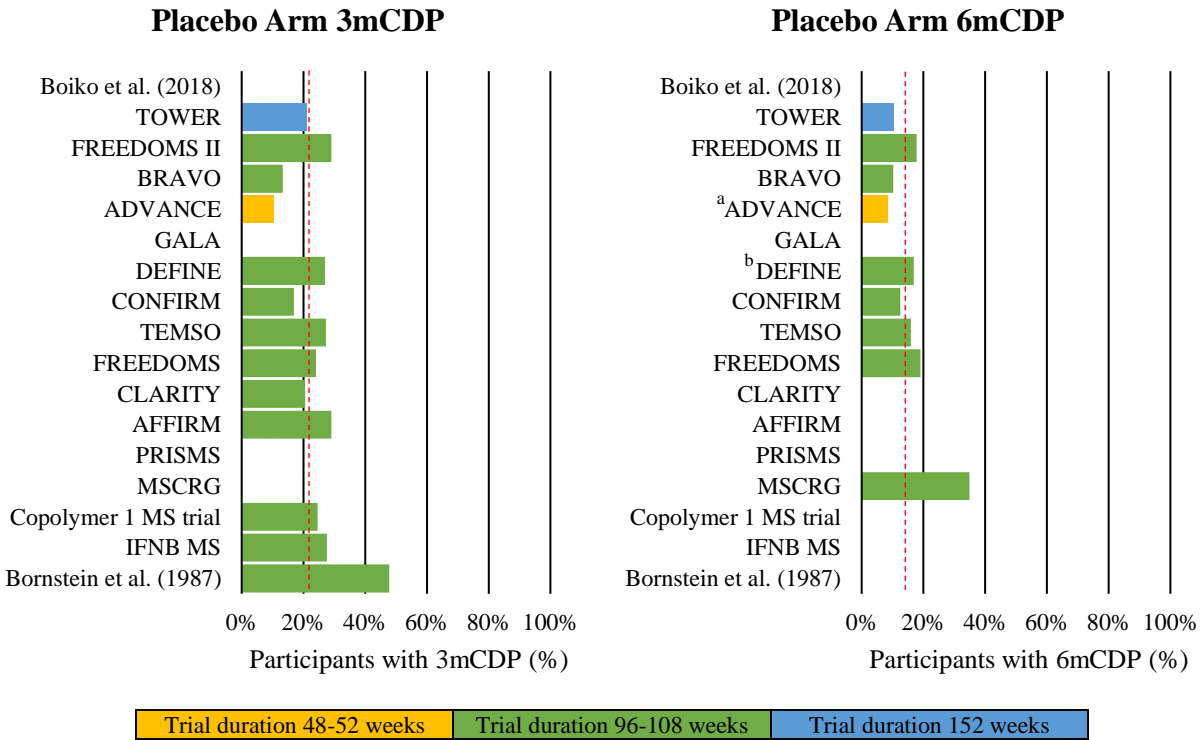

**Figure B.2. Placebo response by trial for proportion of patients with 3mCDP and 6mCDP.**

<sup>a</sup> Obtained from the Summary of Product Characteristics for pegylated interferon beta-1a [94] since it was not reported by the pivotal trial publication [1].

<sup>b</sup> Obtained from a European Medicines Agency report [95] since it was not reported by the pivotal trial publication [17].

Note: It was not possible to compare placebo response for time to 3mCDP and time to 6mCDP across trials as these outcomes were extracted as relative measures (i.e., hazard ratio [HR] between a treatment arm and comparator arm). Instead, the proportion of patients with 3mCDP and the proportion with 6mCDP were calculated and compared across trials.

Note: Trials are ordered by pivotal publication year with the most recent at the top.

Note: Where bars are not shown, data was not reported.

Note: Red dashed line is the mean weighted by sample size (proportion with 3mCDP: 22%, proportion with 6mCDP: 15%).  
 3mCDP 3-month confirmed disability progression, 6mCDP 6-month confirmed disability progression.

## Appendix C Input Data for Network Meta-analyses

Table C.1. Input data for the ARR network meta-analysis.

| Trial Name                       | Treatment        | ARR (mean)         | Sample Size      | Trial Duration (weeks) <sup>a</sup> |
|----------------------------------|------------------|--------------------|------------------|-------------------------------------|
| AFFIRM                           | PBO              | 0.73               | 315              | 104                                 |
|                                  | NAT              | 0.23               | 627              | 104                                 |
| ASCLEPIOS I                      | TER 14 mg        | 0.22               | 452              | 130                                 |
|                                  | OMB              | 0.11               | 454              | 130                                 |
| ASCLEPIOS II                     | TER 14 mg        | 0.25               | 469              | 130                                 |
|                                  | OMB              | 0.10               | 469              | 130                                 |
| ASSESS                           | GA 20 mg         | 0.258              | 324              | 52                                  |
|                                  | FIN              | 0.153              | 345              | 52                                  |
| BEYOND                           | IFNB-1b SC       | 0.36               | 888 <sup>b</sup> | 182                                 |
|                                  | GA 20 mg         | 0.34               | 445 <sup>b</sup> | 182                                 |
| Boiko et al. (2018) <sup>c</sup> | PBO              | 0.271 <sup>d</sup> | 28               | 48                                  |
|                                  | GA 20 mg         | 0.195 <sup>d</sup> | 122              | 48                                  |
| Bornstein et al. (1987)          | PBO              | 1.35 <sup>e</sup>  | 23               | 104                                 |
|                                  | GA 20 mg         | 0.3 <sup>e</sup>   | 25               | 104                                 |
| BRAVO                            | PBO              | 0.34               | 450              | 104                                 |
|                                  | IFNB-1a IM       | 0.26               | 447              | 104                                 |
| Calabrese et al. (2012)          | IFNB-1a IM       | 0.5                | 47               | 104                                 |
|                                  | IFNB-1a SC 44 µg | 0.4                | 46               | 104                                 |
|                                  | GA 20 mg         | 0.5                | 48               | 104                                 |
| CAMMS223                         | IFNB-1a SC 44 µg | 0.36               | 111              | 156                                 |
|                                  | ALE              | 0.11               | 112              | 156                                 |
| CARE-MS I                        | IFNB-1a SC 44 µg | 0.39               | 187              | 104                                 |
|                                  | ALE              | 0.18               | 376              | 104                                 |
| CARE-MS II                       | IFNB-1a SC 44 µg | 0.52               | 202              | 104                                 |
|                                  | ALE              | 0.26               | 426              | 104                                 |
| CLARITY                          | PBO              | 0.33               | 437              | 96                                  |
|                                  | CLA              | 0.14               | 433              | 96                                  |
| CombiRx <sup>f</sup>             | IFNB-1a IM       | 0.16               | 250              | 156                                 |
|                                  | GA 20 mg         | 0.11               | 259              | 156                                 |
| CONFIRM                          | PBO              | 0.401              | 363              | 104                                 |
|                                  | GA 20 mg         | 0.286              | 350              | 104                                 |
|                                  | DMF              | 0.224              | 359              | 104                                 |
| Copolymer 1 MS trial             | PBO              | 0.84               | 126              | 104                                 |
|                                  | GA 20 mg         | 0.59               | 125              | 104                                 |
| DEFINE                           | PBO              | 0.364              | 408              | 96                                  |
|                                  | DMF              | 0.172              | 410              | 96                                  |
| Etemadifar et al. (2006)         | IFNB-1a IM       | 0.950 <sup>d</sup> | 30               | 104                                 |
|                                  | IFNB-1b SC       | 1.083 <sup>d</sup> | 30               | 104                                 |
|                                  | IFNB-1a SC 44 µg | 1.100 <sup>d</sup> | 30               | 104                                 |
| EVIDENCE                         | IFNB-1a IM       | 0.64               | 338              | 48                                  |
|                                  | IFNB-1a SC 44 µg | 0.54               | 339              | 48                                  |
| FREEDOMS                         | PBO              | 0.40               | 418              | 104                                 |
|                                  | FIN              | 0.18               | 425              | 104                                 |

| Trial Name            | Treatment        | ARR (mean)         | Sample Size | Trial Duration (weeks) <sup>a</sup> |
|-----------------------|------------------|--------------------|-------------|-------------------------------------|
| FREEDOMS II           | PBO              | 0.40               | 355         | 104                                 |
|                       | FIN              | 0.21               | 358         | 104                                 |
| GALA                  | PBO              | 0.505              | 461         | 52                                  |
|                       | GA 40 mg         | 0.331              | 943         | 52                                  |
| GOLDEN                | IFNB-1b SC       | 0.39               | 47          | 78                                  |
|                       | FIN              | 0.12               | 104         | 78                                  |
| IFNB MS               | PBO              | 1.27               | 123         | 104                                 |
|                       | IFNB-1b SC       | 0.84               | 124         | 104                                 |
| MSCRG                 | PBO              | 0.82               | 143         | 104                                 |
|                       | IFNB-1a IM       | 0.67               | 158         | 104                                 |
| OPERA I               | IFNB-1a SC 44 µg | 0.292 <sup>g</sup> | 411         | 96                                  |
|                       | OCR              | 0.156 <sup>g</sup> | 410         | 96                                  |
| OPERA II              | IFNB-1a SC 44 µg | 0.290 <sup>g</sup> | 418         | 96                                  |
|                       | OCR              | 0.155 <sup>g</sup> | 417         | 96                                  |
| OPTIMUM               | TER 14 mg        | 0.290              | 566         | 108                                 |
|                       | PON              | 0.202              | 567         | 108                                 |
| PRISMS                | PBO              | 1.28 <sup>e</sup>  | 187         | 104                                 |
|                       | IFNB-1a SC 22 µg | 0.91 <sup>e</sup>  | 189         | 104                                 |
|                       | IFNB-1a SC 44 µg | 0.87 <sup>e</sup>  | 184         | 104                                 |
| RADIANCE-B            | IFNB-1a IM       | 0.28               | 441         | 104                                 |
|                       | OZN              | 0.17               | 433         | 104                                 |
| REGARD                | IFNB-1a SC 44 µg | 0.30               | 386         | 96                                  |
|                       | GA 20 mg         | 0.29               | 378         | 96                                  |
| Stepien et al. (2013) | IFNB-1b SC       | 0.43               | 18          | 156                                 |
|                       | IFNB-1a IM       | 0.35               | 20          | 156                                 |
| SUNBEAM               | IFNB-1a IM       | 0.35               | 448         | 52                                  |
|                       | OZN              | 0.18               | 447         | 52                                  |
| TEMZO                 | PBO              | 0.539 <sup>h</sup> | 363         | 108                                 |
|                       | TER 7 mg         | 0.370 <sup>h</sup> | 365         | 108                                 |
|                       | TER 14 mg        | 0.369 <sup>h</sup> | 358         | 108                                 |
| TENERE                | IFNB-1a SC 44 µg | 0.22               | 104         | 115                                 |
|                       | TER 7 mg         | 0.41               | 109         | 115                                 |
|                       | TER 14 mg        | 0.26               | 111         | 115                                 |
| TOWER                 | PBO              | 0.501 <sup>h</sup> | 388         | 152 <sup>i</sup>                    |
|                       | TER 7 mg         | 0.389 <sup>h</sup> | 407         | 152 <sup>i</sup>                    |
|                       | TER 14 mg        | 0.319 <sup>h</sup> | 370         | 152 <sup>i</sup>                    |
| TRANSFORMS            | IFNB-1a IM       | 0.33               | 431         | 52                                  |
|                       | FIN              | 0.16               | 429         | 52                                  |
| ULTIMATE I            | TER 14 mg        | 0.188 <sup>j</sup> | 274         | 96                                  |
|                       | UTX              | 0.076 <sup>j</sup> | 271         | 96                                  |
| ULTIMATE II           | TER 14 mg        | 0.178 <sup>j</sup> | 272         | 96                                  |
|                       | UTX              | 0.091 <sup>j</sup> | 272         | 96                                  |

<sup>a</sup> Where trial duration was reported in years or months, it was assumed that 1 year = 12 months and 1 year = 52 weeks.

<sup>b</sup> Sample size was not reported and so was assumed based on reported safety results.

<sup>c</sup> Non-inferiority trial for GA 20 mg, so the two GA 20 mg arms were pooled (the ARR was the same for both arms).

<sup>d</sup> ARR calculated by dividing total relapses by number of patients multiplied by trial duration in years.

<sup>e</sup> ARR calculated by dividing relapses per patient (over 2 years) by 2.

<sup>f</sup> Each treatment arm for the CombiRx trial included a placebo for the other treatment.

<sup>g</sup> Value to three decimal places obtained from a European Medicines Agency report [96].

<sup>h</sup> Value to three decimal places obtained from a European Medicines Agency report [93].

<sup>i</sup> Based on the ClinicalTrials.gov record for this trial (NCT00751881).

<sup>j</sup> Value to three decimal places obtained from a conference poster [38].

*ALE* alemtuzumab, *ARR* annualised relapse rate, *CLA* cladribine, *DMF* dimethyl fumarate, *FIN* fingolimod, *GA* glatiramer acetate, *IFNB* interferon beta, *IM* intramuscular, *NAT* natalizumab, *OCR* ocrelizumab, *OMB* ofatumumab, *OZN* ozanimod, *PBO* placebo, *PON* ponesimod, *SC* subcutaneous, *TER* teriflunomide, *UTX* ublituximab.

**Table C.2. Input data for the time to 3mCDP network meta-analysis.**

| Trial Name                     | Treatment        | HR for time to 3mCDP (95% CI) | Ln(HR)                | Ln(HR SE)            |
|--------------------------------|------------------|-------------------------------|-----------------------|----------------------|
| AFFIRM                         | PBO              | -                             | NA                    | NA                   |
|                                | NAT              | 0.58 (0.43-0.77)              | -0.55267              | 0.14862              |
| ASCLEPIOS I (predefined)       | TER 14 mg        | -                             | NA                    | NA                   |
|                                | OMB              | 0.652 (0.445-0.957)           | -0.42682              | 0.19534              |
| ASCLEPIOS I (EDSS-aligned)     | TER 14 mg        | -                             | NA                    | NA                   |
|                                | OMB              | 0.578 (0.388-0.862)           | -0.54762              | 0.20364              |
| ASCLEPIOS II (predefined)      | TER 14 mg        | -                             | NA                    | NA                   |
|                                | OMB              | 0.660 (0.447-0.947)           | -0.42983              | 0.19152              |
| ASCLEPIOS II (EDSS-aligned)    | TER 14 mg        | -                             | NA                    | NA                   |
|                                | OMB              | 0.615 (0.405-0.936)           | -0.48500              | 0.21371              |
| BEYOND                         | IFNB-1b SC       | -                             | NA                    | NA                   |
|                                | GA 20 mg         | NR                            | -0.05484 <sup>a</sup> | 0.12911 <sup>a</sup> |
| Bornstein et al. (1987)        | PBO              | -                             | NA                    | NA                   |
|                                | GA 20 mg         | NR                            | -1.07006 <sup>a</sup> | 0.54313 <sup>a</sup> |
| BRAVO                          | PBO              | -                             | NA                    | NA                   |
|                                | IFNB-1a IM       | 0.74 (0.51-1.09)              | -0.29358              | 0.19376              |
| CLARITY                        | PBO              | -                             | NA                    | NA                   |
|                                | CLA              | 0.67 (0.48-0.93)              | -0.40327              | 0.16872              |
| CONFIRM                        | PBO              | -                             | NA                    | NA                   |
|                                | GA 20 mg         | 0.93 (0.63-1.37)              | -0.07361              | 0.19818              |
|                                | DMF              | 0.79 (0.52-1.19)              | -0.23999              | 0.21119              |
| Copolymer 1 MS trial           | PBO              | -                             | NA                    | NA                   |
|                                | GA 20 mg         | NR                            | -0.14871 <sup>a</sup> | 0.26400 <sup>a</sup> |
| DEFINE                         | PBO              | -                             | NA                    | NA                   |
|                                | DMF              | 0.62 (0.44-0.87)              | -0.48012              | 0.17391              |
| EVIDENCE                       | IFNB-1a IM       | -                             | NA                    | NA                   |
|                                | IFNB-1a SC 44 µg | 0.87 (0.58-1.31)              | -0.13735              | 0.20785              |
| FREEDOMS                       | PBO              | -                             | NA                    | NA                   |
|                                | FIN              | 0.70 (0.52-0.96)              | -0.34737              | 0.15640              |
| FREEDOMS II                    | PBO              | -                             | NA                    | NA                   |
|                                | FIN              | 0.83 (0.61-1.12)              | -0.19048              | 0.15501              |
| HAS meta-analysis <sup>b</sup> | IFNB-1a SC 44 µg | -                             | NA                    | NA                   |
|                                | ALE              | 0.66 (0.49-0.87)              | -0.42631              | 0.14645              |
| IFNB MS                        | PBO              | -                             | NA                    | NA                   |
|                                | IFNB-1b SC       | NR                            | -0.36253 <sup>a</sup> | 0.26427 <sup>a</sup> |
| OPERA I                        | IFNB-1a SC 44 µg | -                             | NA                    | NA                   |
|                                | OCR              | 0.57 (0.37-0.90)              | -0.54981              | 0.22676              |
| OPERA II                       | IFNB-1a SC 44 µg | -                             | NA                    | NA                   |
|                                | OCR              | 0.63 (0.42-0.92)              | -0.47544              | 0.20003              |
| OPTIMUM                        | TER 14 mg        | -                             | NA                    | NA                   |
|                                | PON              | 0.83 (0.58-1.18)              | -0.18961              | 0.18118              |

| Trial Name                          | Treatment        | HR for time to 3mCDP (95% CI)    | Ln(HR)                | Ln(HR SE)            |
|-------------------------------------|------------------|----------------------------------|-----------------------|----------------------|
| PRISMS                              | PBO              | -                                | NA                    | NA                   |
|                                     | IFNB-1a SC 22 µg | 0.68 (0.48-0.98)                 | -0.37709              | 0.18208              |
|                                     | IFNB-1a SC 44 µg | 0.62 (0.43-0.91)                 | -0.46914              | 0.19124              |
| RADIANCE-B and SUNBEAM <sup>c</sup> | INF-1a IM        | -                                | NA                    | NA                   |
|                                     | OZN              | 0.95 (0.68-1.33)                 | -0.05024              | 0.17113              |
| TEMSO                               | PBO              | -                                | NA                    | NA                   |
|                                     | TER 7 mg         | 0.763 (0.555-1.049) <sup>d</sup> | -0.27047              | 0.16240              |
|                                     | TER 14 mg        | 0.702 (0.506-0.973) <sup>d</sup> | -0.35429              | 0.16680              |
| TOWER                               | PBO              | -                                | NA                    | NA                   |
|                                     | TER 7 mg         | 0.955 (0.677-1.347) <sup>d</sup> | -0.04610              | 0.17550              |
|                                     | TER 14 mg        | 0.685 (0.467-1.004) <sup>d</sup> | -0.37872              | 0.19526              |
| TRANSFORMS                          | IFNB-1a IM       | -                                | NA                    | NA                   |
|                                     | FIN              | NR                               | -0.30252 <sup>a</sup> | 0.26250 <sup>a</sup> |
| ULTIMATE I/II <sup>e</sup>          | TER 14 mg        | -                                | NA                    | NA                   |
|                                     | UTX              | 0.843 (0.504-1.407) <sup>f</sup> | -0.17186              | 0.26190              |

<sup>a</sup> Derived from the reported proportion of patients who progressed over the trial duration using formulae described by Watkins and Bennett (2018) [97].

<sup>b</sup> A pooled time to 3mCDP estimate derived from CAMMS223, CARE-MS I, and CARE-MS II was reported in a 2016 HAS meta-analysis [98]. Because CARE-MS I and CARE-MS II do not publicly report the result for the outcome of time to 3mCDP, the decision was made to use the HAS meta-analysis value to include these trials in the time to 3mCDP network. This HAS value was also used by McCool et al. (2019) [99] and Samjoo et al. (2020) [100].

<sup>c</sup> Disability progression was assessed as a prespecified pooled analysis of the RADIANCE-B and SUNBEAM trials; values are for the pooled analysis as reported in the RADIANCE pivotal trial publication (Cohen et al. [2019] [30]).

<sup>d</sup> Value to three decimal places obtained from a European Medicines Agency report [93].

<sup>e</sup> Disability progression was assessed as a prespecified pooled analysis of ULTIMATE I and ULTIMATE II.

<sup>f</sup> Value to three decimal places obtained from a conference poster [38].

3mCDP 3-month confirmed disability progression, *ALE* alemtuzumab, *CLA* cladribine, *DMF* dimethyl fumarate, *FIN* fingolimod, *GA* glatiramer acetate, *HAS* Haute Autorité de Santé, *HR* hazard ratio, *IFNB* interferon beta, *IM* intramuscular, *NA* not applicable, *NAT* natalizumab, *NR* not reported, *OCR* ocrelizumab, *OMB* ofatumumab, *OZN* ozanimod, *PBO* placebo, *PON* ponesimod, *SC* subcutaneous, *SE* standard error, *TER* teriflunomide, *UTX* ublituximab.

**Table C.3. Input data for the time to 6mCDP network meta-analysis.**

| Trial Name                          | Treatment        | HR for time to 6mCDP (95% CI) | Ln(HR)                | Ln(HR SE)            |
|-------------------------------------|------------------|-------------------------------|-----------------------|----------------------|
| AFFIRM                              | PBO              | -                             | NA                    | NA                   |
|                                     | NAT              | 0.46 (0.33-0.64)              | -0.77747              | 0.16897              |
| ASCLEPIOS I (predefined)            | TER 14 mg        | -                             | NA                    | NA                   |
|                                     | OMB              | 0.607 (0.396-0.930)           | -0.49946              | 0.21780              |
| ASCLEPIOS I (EDSS-aligned)          | TER 14 mg        | -                             | NA                    | NA                   |
|                                     | OMB              | 0.564 (0.361-0.880)           | -0.57336              | 0.22731              |
| ASCLEPIOS II (predefined)           | TER 14 mg        | -                             | NA                    | NA                   |
|                                     | OMB              | 0.756 (0.489-1.170)           | -0.27919              | 0.22255              |
| ASCLEPIOS II (EDSS-aligned)         | TER 14 mg        | -                             | NA                    | NA                   |
|                                     | OMB              | 0.671 (0.418-1.077)           | -0.39905              | 0.24144              |
| BRAVO                               | PBO              | -                             | NA                    | NA                   |
|                                     | IFNB-1a IM       | 0.73 (0.47-1.14)              | -0.31200              | 0.22603              |
| CAMMS223                            | IFNB-1a SC 44 µg | -                             | NA                    | NA                   |
|                                     | ALE              | 0.25 (0.11-0.57)              | -1.38470              | 0.00000              |
| CARE-MS I                           | IFNB-1a SC 44 µg | -                             | NA                    | NA                   |
|                                     | ALE              | 0.70 (0.40-1.23)              | -0.35464              | 0.28656              |
| CARE-MS II                          | IFNB-1a SC 44 µg | -                             | NA                    | NA                   |
|                                     | ALE              | 0.58 (0.38-0.87)              | -0.55342              | 0.21131              |
| CLARITY                             | PBO              | -                             | NA                    | NA                   |
|                                     | CLA              | 0.53 (0.36-0.79) <sup>a</sup> | -0.62869              | 0.20049              |
| CombiRx <sup>b</sup>                | IFNB-1a IM       | -                             | NA                    | NA                   |
|                                     | GA 20 mg         | NR                            | 0.15914 <sup>c</sup>  | 0.18929 <sup>c</sup> |
| CONFIRM                             | PBO              | -                             | NA                    | NA                   |
|                                     | GA 20 mg         | 0.87 (0.55-1.38)              | -0.13788              | 0.23467              |
|                                     | DMF              | 0.62 (0.37-1.03)              | -0.48235              | 0.26118              |
| DEFINE                              | PBO              | -                             | NA                    | NA                   |
|                                     | DMF              | 0.77 (0.52-1.14) <sup>d</sup> | -0.26145              | 0.20024              |
| EVIDENCE                            | IFNB-1a IM       | -                             | NA                    | NA                   |
|                                     | IFNB-1a SC 44 µg | 0.70 (0.39-1.25)              | -0.35923              | 0.29713              |
| FREEDOMS                            | PBO              | -                             | NA                    | NA                   |
|                                     | FIN              | 0.63 (0.44-0.90)              | -0.46317              | 0.18256              |
| FREEDOMS II                         | PBO              | -                             | NA                    | NA                   |
|                                     | FIN              | 0.72 (0.48-1.07)              | -0.33316              | 0.20450              |
| MSCRG                               | PBO              | -                             | NA                    | NA                   |
|                                     | IFNB-1a IM       | NR                            | -0.55191 <sup>c</sup> | 0.22225 <sup>c</sup> |
| OPERA I                             | IFNB-1a SC 44 µg | -                             | NA                    | NA                   |
|                                     | OCR              | 0.57 (0.34-0.95)              | -0.56505              | 0.26212              |
| OPERA II                            | IFNB-1a SC 44 µg | -                             | NA                    | NA                   |
|                                     | OCR              | 0.63 (0.40-0.98)              | -0.46825              | 0.22859              |
| OPTIMUM                             | TER 14 mg        | -                             | NA                    | NA                   |
|                                     | PON              | 0.84 (0.57-1.24)              | -0.17350              | 0.19827              |
| RADIANCE-B and SUNBEAM <sup>e</sup> | IFNB-1a IM       | -                             | NA                    | NA                   |
|                                     | OZN              | 1.41 (0.92-2.17)              | 0.34567               | 0.21891              |
| REGARD                              | IFNB-1a SC 44 µg | -                             | NA                    | NA                   |
|                                     | GA 20 mg         | NR                            | -0.30522 <sup>c</sup> | 0.22929 <sup>c</sup> |

| Trial Name                 | Treatment  | HR for time to 6mCDP (95% CI)    | Ln(HR)   | Ln(HR SE) |
|----------------------------|------------|----------------------------------|----------|-----------|
| TEMISO                     | PBO        | -                                | NA       | NA        |
|                            | TERI 7 mg  | 0.750 (0.507-1.110) <sup>f</sup> | -0.28744 | 0.19990   |
|                            | TERI 14 mg | 0.749 (0.505-1.111) <sup>f</sup> | -0.28897 | 0.20114   |
| TOWER                      | PBO        | -                                | NA       | NA        |
|                            | TERI 7 mg  | 1.054 (0.690-1.610) <sup>f</sup> | 0.05259  | 0.21615   |
|                            | TERI 14 mg | 0.843 (0.533-1.334) <sup>f</sup> | -0.17053 | 0.23403   |
| ULTIMATE I/II <sup>g</sup> | TER 14 mg  | -                                | NA       | NA        |
|                            | UTX        | 0.657 (0.358-1.205) <sup>h</sup> | -0.42037 | 0.30962   |

<sup>a</sup> Obtained from a European Medicines Agency report [101] since not reported by the pivotal trial publication [13].

<sup>b</sup> Each treatment arm for the CombiRx trial included a placebo for the other treatment.

<sup>c</sup> Derived from the reported proportion of patients who progressed over the trial duration using formulae described by Watkins and Bennett (2018) [97].

<sup>d</sup> Obtained from a European Medicines Agency report [95] since not reported by the pivotal trial publication [17].

<sup>e</sup> Disability progression was assessed as a prespecified pooled analysis of the RADIANCE-B and SUNBEAM trials; values are for the pooled analysis as reported in the RADIANCE pivotal trial publication [30].

<sup>f</sup> Value to three decimal places obtained from a European Medicines Agency report [93].

<sup>g</sup> Disability progression was assessed as a prespecified pooled analysis of ULTIMATE I and ULTIMATE II.

<sup>h</sup> Value to three decimal places obtained from a conference poster [38].

6mCDP 6-month confirmed disability progression, ALE alemtuzumab, CLA cladribine, DMF dimethyl fumarate, FIN fingolimod, GA glatiramer acetate, HR hazard ratio, IFNB interferon beta, IM intramuscular, NA not applicable, NAT natalizumab, NR not reported, OCR ocrelizumab, OMB ofatumumab, OZN ozanimod, PBO placebo, PON ponesimod, SC subcutaneous, SE standard error, TER teriflunomide, UTX ublituximab.



**Table D.1. SUCRA and p-best for the ARR network meta-analysis.**

| Treatment                | Mean SUCRA (%) | Mean p-best (%) | Trial Name(s)                                                                                                                                                                  |
|--------------------------|----------------|-----------------|--------------------------------------------------------------------------------------------------------------------------------------------------------------------------------|
| Alemtuzumab              | 94             | 39              | CAMMS223; CARE-MS I; CARE-MS II                                                                                                                                                |
| Cladribine               | 66             | 1               | CLARITY                                                                                                                                                                        |
| Dimethyl fumarate        | 54             | 0               | CONFIRM; DEFINE                                                                                                                                                                |
| Fingolimod               | 66             | 0               | ASSESS; FREEDOMS; FREEDOMS II; GOLDEN; TRANSFORMS                                                                                                                              |
| Glatiramer acetate 20 mg | 36             | 0               | ASSESS; BEYOND; Boiko et al. (2018); Bornstein et al. (1987); Calabrese et al. (2012); CombiRx; CONFIRM; Copolymer 1 MS trial; REGARD                                          |
| Glatiramer acetate 40 mg | 32             | 0               | GALA                                                                                                                                                                           |
| IFNB-1a IM               | 14             | 0               | BRAVO; Calabrese et al. (2012); CombiRx; Etemadifar et al. (2006); EVIDENCE; MSCRG; RADIANCE-B; Stepien et al. (2013); SUNBEAM; TRANSFORMS                                     |
| IFNB-1a SC 22 µg         | 25             | 0               | PRISMS                                                                                                                                                                         |
| IFNB-1a SC 44 µg         | 35             | 0               | Calabrese et al. (2012); CAMMS223; CARE-MS I; CARE-MS II; Etemadifar et al. (2006); EVIDENCE; OPERA I; OPERA II; PRISMS; REGARD; TENERE                                        |
| IFNB-1b SC               | 20             | 0               | BEYOND; Etemadifar et al. (2006); GOLDEN; IFNB MS; Stepien et al. (2013)                                                                                                       |
| Natalizumab              | 86             | 14              | AFFIRM                                                                                                                                                                         |
| Ocrelizumab              | 81             | 3               | OPERA I; OPERA II                                                                                                                                                              |
| Ofatumumab               | 90             | 23              | ASCLEPIOS I; ASCLEPIOS II                                                                                                                                                      |
| Ozanimod                 | 65             | 0               | RADIANCE-B; SUNBEAM                                                                                                                                                            |
| Placebo                  | 0              | 0               | AFFIRM; Boiko et al. (2018); Bornstein et al. (1987); BRAVO; CLARITY; CONFIRM; Copolymer 1 MS trial; DEFINE; FREEDOMS; FREEDOMS II; GALA; IFNB MS; MSCRG; PRISMS; TEMSO; TOWER |
| Ponesimod                | 58             | 0               | OPTIMUM                                                                                                                                                                        |
| Teriflunomide 7 mg       | 11             | 0               | TEMSO; TENERE; TOWER                                                                                                                                                           |
| Teriflunomide 14 mg      | 30             | 0               | ASCLEPIOS I; ASCLEPIOS II; OPTIMUM; TEMSO; TENERE; TOWER; ULTIMATE I; ULTIMATE II                                                                                              |
| Ublituximab              | 87             | 21              | ULTIMATE I; ULTIMATE II                                                                                                                                                        |

ARR annualised relapse rate, IFNB interferon beta, IM intramuscular, NMA network meta-analysis, p-best probability of being the best treatment, SC subcutaneous, SUCRA surface under the cumulative ranking curve.





**Table D.2. SUCRA and p-best for the time to 3mCDP network meta-analysis (predefined).**

| Treatment                | Mean SUCRA (%) | Mean p-best (%) | Trial Name(s)                                                                                                                                |
|--------------------------|----------------|-----------------|----------------------------------------------------------------------------------------------------------------------------------------------|
| Alemtuzumab              | 89             | 24              | CAMMS223; CARE-MS I; CARE-MS II                                                                                                              |
| Cladribine 3.5 mg/kg     | 50             | 1               | CLARITY                                                                                                                                      |
| Dimethyl fumarate        | 53             | 0               | CONFIRM; DEFINE                                                                                                                              |
| Fingolimod               | 39             | 0               | FREEDOMS; FREEDOMS II; TRANSFORMS                                                                                                            |
| Glatiramer acetate 20 mg | 33             | 0               | BEYOND; Bornstein et al. (1987); CONFIRM; Copolymer 1 MS trial                                                                               |
| IFNB-1a IM               | 26             | 0               | BRAVO; EVIDENCE; RADIANCE-B; SUNBEAM; TRANSFORMS                                                                                             |
| IFNB-1a SC 22 µg         | 44             | 0               | PRISMS                                                                                                                                       |
| IFNB-1a SC 44 µg         | 54             | 0               | CAMMS223; CARE-MS I; CARE-MS II; EVIDENCE; OPERA I; OPERA II; PRISMS                                                                         |
| IFNB-1b SC               | 31             | 0               | BEYOND; IFNB MS                                                                                                                              |
| Natalizumab              | 69             | 2               | AFFIRM                                                                                                                                       |
| Ocrelizumab              | 93             | 43              | OPERA I; OPERA II                                                                                                                            |
| Ofatumumab               | 87             | 20              | ASCLEPIOS I; ASCLEPIOS II                                                                                                                    |
| Ozanimod                 | 34             | 0               | RADIANCE-B; SUNBEAM                                                                                                                          |
| Placebo                  | 3              | 0               | AFFIRM; Bornstein et al. (1987); BRAVO; CLARITY; CONFIRM; Copolymer 1 MS trial; DEFINE; FREEDOMS; FREEDOMS II; IFNB MS; PRISMS; TEMSO; TOWER |
| Ponesimod                | 66             | 3               | OPTIMUM                                                                                                                                      |
| Teriflunomide 7 mg       | 20             | 0               | TEMSO; TOWER                                                                                                                                 |
| Teriflunomide 14 mg      | 46             | 0               | ASCLEPIOS I; ASCLEPIOS II; OPTIMUM; TEMSO; TOWER; ULTIMATE I; ULTIMATE II                                                                    |
| Ublituximab              | 63             | 7               | ULTIMATE I; ULTIMATE II                                                                                                                      |

3mCDP 3-month confirmed disability progression, IFNB interferon beta, IM intramuscular, p-best probability of being the best treatment, SC subcutaneous, SUCRA surface under the cumulative ranking curve.

**Table D.3. SUCRA and p-best for the time to 3mCDP network meta-analysis (EDSS-aligned).**

| Treatment                | Mean SUCRA (%) | Mean p-best (%) | Trial Name(s)                                                                                                                                |
|--------------------------|----------------|-----------------|----------------------------------------------------------------------------------------------------------------------------------------------|
| Alemtuzumab              | 88             | 21              | CAMMS223; CARE-MS I; CARE-MS II                                                                                                              |
| Cladribine 3.5 mg/kg     | 52             | 1               | CLARITY                                                                                                                                      |
| Dimethyl fumarate        | 53             | 0               | CONFIRM; DEFINE                                                                                                                              |
| Fingolimod               | 40             | 0               | FREEDOMS; FREEDOMS II; TRANSFORMS                                                                                                            |
| Glatiramer acetate 20 mg | 32             | 0               | BEYOND; Bornstein et al. (1987); CONFIRM; Copolymer 1 MS trial                                                                               |
| IFNB-1a IM               | 27             | 0               | BRAVO; EVIDENCE; RADIANCE-B; SUNBEAM; TRANSFORMS                                                                                             |
| IFNB-1a SC 22 µg         | 45             | 0               | PRISMS                                                                                                                                       |
| IFNB-1a SC 44 µg         | 52             | 0               | CAMMS223; CARE-MS I; CARE-MS II; EVIDENCE; OPERA I; OPERA II; PRISMS                                                                         |
| IFNB-1b SC               | 31             | 0               | BEYOND; IFNB MS                                                                                                                              |
| Natalizumab              | 69             | 2               | AFFIRM                                                                                                                                       |
| Ocrelizumab              | 92             | 37              | OPERA I; OPERA II                                                                                                                            |
| Ofatumumab               | 90             | 30              | ASCLEPIOS I; ASCLEPIOS II                                                                                                                    |
| Ozanimod                 | 35             | 0               | RADIANCE-B; SUNBEAM                                                                                                                          |
| Placebo                  | 3              | 0               | AFFIRM; Bornstein et al. (1987); BRAVO; CLARITY; CONFIRM; Copolymer 1 MS trial; DEFINE; FREEDOMS; FREEDOMS II; IFNB MS; PRISMS; TEMSO; TOWER |
| Ponesimod                | 65             | 3               | OPTIMUM                                                                                                                                      |
| Teriflunomide 7 mg       | 20             | 0               | TEMSO; TOWER                                                                                                                                 |
| Teriflunomide 14 mg      | 45             | 0               | ASCLEPIOS I; ASCLEPIOS II; OPTIMUM; TEMSO; TOWER; ULTIMATE I; ULTIMATE II                                                                    |
| Ublituximab              | 63             | 6               | ULTIMATE I; ULTIMATE II                                                                                                                      |

3mCDP 3-month confirmed disability progression, IFNB interferon beta, IM intramuscular, p-best probability of being the best treatment, SC subcutaneous, SUCRA surface under the cumulative ranking curve.





**Table D.4. SUCRA and p-best for the time to 6mCDP network meta-analysis (predefined).**

| Treatment                | Mean SUCRA (%) | Mean p-best (%) | Trial Name(s)                                                                       |
|--------------------------|----------------|-----------------|-------------------------------------------------------------------------------------|
| Alemtuzumab              | 87             | 34              | CAMMS223; CARE-MS I; CARE-MS II                                                     |
| Cladribine 3.5 mg/kg     | 70             | 8               | CLARITY                                                                             |
| Dimethyl fumarate        | 50             | 0               | CONFIRM; DEFINE                                                                     |
| Fingolimod               | 51             | 0               | FREEDOMS; FREEDOMS II                                                               |
| Glatiramer acetate 20 mg | 34             | 0               | CombiRx; CONFIRM; REGARD                                                            |
| IFNB-1a IM               | 44             | 0               | BRAVO; CombiRx; EVIDENCE; MSCRG; RADIANCE-B; SUNBEAM                                |
| IFNB-1a SC 44 µg         | 34             | 0               | CAMMS223; CARE-MS I; CARE-MS II; EVIDENCE; OPERA I; OPERA II; REGARD                |
| Natalizumab              | 83             | 18              | AFFIRM                                                                              |
| Ocrelizumab              | 79             | 15              | OPERA I; OPERA II                                                                   |
| Ofatumumab               | 72             | 6               | ASCLEPIOS I; ASCLEPIOS II                                                           |
| Ozanimod                 | 15             | 0               | RADIANCE-B; SUNBEAM                                                                 |
| Placebo                  | 8              | 0               | AFFIRM; BRAVO; CLARITY; CONFIRM; DEFINE; FREEDOMS; FREEDOMS II; MSCRG; TEMSO; TOWER |
| Ponesimod                | 50             | 2               | OPTIMUM                                                                             |
| Teriflunomide 7 mg       | 21             | 0               | TEMSO; TOWER                                                                        |
| Teriflunomide 14 mg      | 32             | 0               | ASCLEPIOS I; ASCLEPIOS II; OPTIMUM; TEMSO; TOWER; ULTIMATE I; ULTIMATE II           |
| Ublituximab              | 70             | 17              | ULTIMATE I; ULTIMATE II                                                             |

6mCDP 6-month confirmed disability progression, IFNB interferon beta, IM intramuscular, p-best probability of being the best treatment, SC subcutaneous, SUCRA surface under the cumulative ranking curve.

**Table D.5. SUCRA and p-best for the time to 6mCDP network meta-analysis (EDSS-aligned).**

| Treatment                | Mean SUCRA (%) | Mean p-best (%) | Trial Name(s)                                                                       |
|--------------------------|----------------|-----------------|-------------------------------------------------------------------------------------|
| Alemtuzumab              | 85             | 28              | CAMMS223; CARE-MS I; CARE-MS II                                                     |
| Cladribine 3.5 mg/kg     | 70             | 6               | CLARITY                                                                             |
| Dimethyl fumarate        | 49             | 0               | CONFIRM; DEFINE                                                                     |
| Fingolimod               | 51             | 0               | FREEDOMS; FREEDOMS II                                                               |
| Glatiramer acetate 20 mg | 32             | 0               | CombiRx; CONFIRM; REGARD                                                            |
| IFNB-1a IM               | 43             | 0               | BRAVO; CombiRx; EVIDENCE; MSCRG; RADIANCE-B; SUNBEAM                                |
| IFNB-1a SC 44 µg         | 30             | 0               | CAMMS223; CARE-MS I; CARE-MS II; EVIDENCE; OPERA I; OPERA II; REGARD                |
| Natalizumab              | 82             | 17              | AFFIRM                                                                              |
| Ocrelizumab              | 77             | 12              | OPERA I; OPERA II                                                                   |
| Ofatumumab               | 80             | 15              | ASCLEPIOS I; ASCLEPIOS II                                                           |
| Ozanimod                 | 14             | 0               | RADIANCE-B; SUNBEAM                                                                 |
| Placebo                  | 8              | 0               | AFFIRM; BRAVO; CLARITY; CONFIRM; DEFINE; FREEDOMS; FREEDOMS II; MSCRG; TEMSO; TOWER |
| Ponesimod                | 51             | 2               | OPTIMUM                                                                             |
| Teriflunomide 7 mg       | 22             | 0               | TEMSO; TOWER                                                                        |
| Teriflunomide 14 mg      | 33             | 0               | ASCLEPIOS I; ASCLEPIOS II; OPTIMUM; TEMSO; TOWER; ULTIMATE I; ULTIMATE II           |
| Ublituximab              | 72             | 19              | ULTIMATE I; ULTIMATE II                                                             |

6mCDP 6-month confirmed disability progression, IFNB interferon beta, IM intramuscular, p-best probability of being the best treatment, SC subcutaneous, SUCRA surface under the cumulative ranking curve.

## Appendix E Summary of Direct Evidence and NMA Estimates

**Table E.1. Comparison of direct evidence and NMA estimates for ARR.**

| Comparison                                     | Direct Evidence<br>RR (95% CrI)                                                                                                                               | Network Meta-analysis<br>RR (95% CrI) |
|------------------------------------------------|---------------------------------------------------------------------------------------------------------------------------------------------------------------|---------------------------------------|
| Alemtuzumab vs. IFNB-1a SC 44                  | CAMMS223: 0.31 <sup>a</sup><br>CARE-MS I: 0.45 (0.32 to 0.63)<br>CARE-MS II: 0.51 (0.39 to 0.65)                                                              | 0.44 (0.35 to 0.53)                   |
| Cladribine vs. placebo                         | CLARITY: 0.42 <sup>a</sup>                                                                                                                                    | 0.42 (0.30 to 0.59)                   |
| Dimethyl fumarate vs. glatiramer acetate 20 mg | CONFIRM: 0.78 <sup>a</sup>                                                                                                                                    | 0.79 (0.62 to 1.01)                   |
| Dimethyl fumarate vs. placebo                  | CONFIRM: 0.56 <sup>a</sup><br>DEFINE: 0.47 (0.37 to 0.61)                                                                                                     | 0.50 (0.40 to 0.62)                   |
| Fingolimod vs. glatiramer acetate 20 mg        | ASSESS: 0.59 <sup>a</sup>                                                                                                                                     | 0.66 (0.54 to 0.81)                   |
| Fingolimod vs. IFNB-1a IM                      | TRANSFORMS: 0.48 <sup>a</sup>                                                                                                                                 | 0.55 (0.45 to 0.67)                   |
| Fingolimod vs. IFNB-1b SC                      | GOLDEN: 0.31 <sup>a</sup>                                                                                                                                     | 0.59 (0.44 to 0.73)                   |
| Fingolimod vs. placebo                         | FREEDOMS: 0.45 <sup>a</sup><br>FREEDOMS II: 0.52 (0.40 to 0.66)                                                                                               | 0.42 (0.35 to 0.50)                   |
| Glatiramer acetate 20 mg vs. placebo           | Boiko et al. (2018): 0.72 <sup>a</sup><br>Bornstein et al. (1987): 0.22 <sup>a</sup><br>CONFIRM: 0.71 <sup>a</sup><br>Copolymer 1 MS trial: 0.70 <sup>a</sup> | 0.64 (0.55 to 0.73)                   |
| Glatiramer acetate 40 mg vs. placebo           | GALA: 0.66 (0.54 to 0.80)                                                                                                                                     | 0.65 (0.48 to 0.90)                   |
| IFNB-1a IM vs. glatiramer acetate 20 mg        | Calabrese et al. (2012): 1.00 <sup>a</sup><br>CombiRx: 1.46 <sup>a</sup>                                                                                      | 1.20 (1.02 to 1.43)                   |
| IFNB-1a IM vs. IFNB-1b SC                      | Etemadifar et al. (2006): 0.88 <sup>a</sup><br>Stepien et al. (2013): 0.81 <sup>a</sup>                                                                       | 1.06 (0.84 to 1.28)                   |
| IFNB-1a IM vs. placebo                         | BRAVO: 0.74 (0.60 to 0.92)<br>MSCRG: 0.82 <sup>a</sup>                                                                                                        | 0.77 (0.65 to 0.89)                   |
| IFNB-1a SC 22 µg vs. placebo                   | PRISMS: 0.71 <sup>a</sup>                                                                                                                                     | 0.69 (0.53 to 0.90)                   |
| IFNB-1a SC 44 µg vs. glatiramer acetate 20 mg  | Calabrese et al. (2012): 0.80 <sup>a</sup><br>REGARD: 1.03 <sup>a</sup>                                                                                       | 1.01 (0.85 to 1.20)                   |
| IFNB-1a SC 44 µg vs. IFNB-1a IM                | Calabrese et al. (2012): 0.80 <sup>a</sup><br>Etemadifar et al. (2006): 1.16 <sup>a</sup><br>EVIDENCE: 0.84 <sup>a</sup>                                      | 0.84 (0.71 to 1.00)                   |
| IFNB-1a SC 44 µg vs. IFNB-1a SC 22 µg          | PRISMS: 0.96 <sup>a</sup>                                                                                                                                     | 0.92 (0.70 to 1.21)                   |
| IFNB-1a SC 44 µg vs. IFNB-1b SC                | Etemadifar et al. (2006): 1.02 <sup>a</sup>                                                                                                                   | 0.89 (0.70 to 1.08)                   |
| IFNB-1a SC 44 µg vs. placebo                   | PRISMS: 0.68 <sup>a</sup>                                                                                                                                     | 0.64 (0.54 to 0.75)                   |
| IFNB-1a SC 44 µg vs. teriflunomide 7 mg        | TENERE: 0.54 <sup>a</sup>                                                                                                                                     | 0.81 (0.62 to 0.99)                   |
| IFNB-1a SC 44 µg vs. teriflunomide 14 mg       | TENERE: 0.85 <sup>a</sup>                                                                                                                                     | 0.96 (0.75 to 1.18)                   |
| IFNB-1b SC vs. glatiramer acetate 20 mg        | BEYOND: 1.06 <sup>a</sup>                                                                                                                                     | 1.13 (0.96 to 1.41)                   |
| IFNB-1b SC vs. placebo                         | IFNB MS: 0.66 <sup>a</sup>                                                                                                                                    | 0.72 (0.61 to 0.89)                   |
| Natalizumab vs. placebo                        | AFFIRM: 0.32 <sup>a</sup>                                                                                                                                     | 0.32 (0.23 to 0.42)                   |
| Ocrelizumab vs. IFNB-1a SC 44                  | OPERA I: 0.54 (0.40 to 0.72)<br>OPERA II: 0.53 (0.40 to 0.71)                                                                                                 | 0.53 (0.42 to 0.68)                   |
| Ofatumumab vs. teriflunomide 14 mg             | ASCLEPIOS I: 0.50 (0.37 to 0.65)<br>ASCLEPIOS II: 0.42 (0.31 to 0.56)                                                                                         | 0.45 (0.35 to 0.57)                   |
| Ozanimod vs. IFNB-1a IM                        | RADIANCE-B: 0.62 (0.51 to 0.77)<br>SUNBEAM: 0.52 (0.41 to 0.66)                                                                                               | 0.56 (0.44 to 0.72)                   |
| Ponesimod vs. teriflunomide 14 mg              | OPTIMUM: 0.70 (0.54 to 0.90)                                                                                                                                  | 0.70 (0.51 to 0.95)                   |
| Teriflunomide 7 mg vs. placebo                 | TEMSO: 0.69 <sup>a</sup><br>TOWER: 0.78 <sup>a</sup>                                                                                                          | 0.79 (0.67 to 0.99)                   |
| Teriflunomide 14 mg vs. placebo                | TEMSO: 0.68 <sup>a</sup><br>TOWER: 0.64 <sup>a</sup>                                                                                                          | 0.67 (0.56 to 0.82)                   |
| Teriflunomide 7 mg vs. teriflunomide 14 mg     | TEMSO: 1.00 <sup>a</sup><br>TENERE: 1.58 <sup>a</sup><br>TOWER: 1.22 <sup>a</sup>                                                                             | 1.19 (1.00 to 1.45)                   |
| Ublituximab vs. teriflunomide 14 mg            | ULTIMATE I: 0.41 (0.27 to 0.62)<br>ULTIMATE II: 0.51 (0.33 to 0.78)                                                                                           | 0.46 (0.33 to 0.63)                   |

<sup>a</sup> RR was not reported by the specified RCT, so an RR was estimated based on the reported ARR values for each arm.

ARR annualised relapse rate, CrI credible interval, IFNB interferon beta, IM intramuscular, RCT randomised controlled trial, RR rate ratio, SC subcutaneous.

**Table E.2. Comparison of direct evidence and NMA estimates for time to 3mCDP.**

| Comparison                              | Direct Evidence<br>HR (95% CrI)                                                                                                                                                                                    | Network Meta-analysis<br>HR (95% CrI)<br>(Predefined) | Network Meta-analysis<br>HR (95% CrI)<br>(EDSS-aligned) |
|-----------------------------------------|--------------------------------------------------------------------------------------------------------------------------------------------------------------------------------------------------------------------|-------------------------------------------------------|---------------------------------------------------------|
| Alemtuzumab vs. IFNB-1a SC 44           | HAS meta-analysis:<br>0.66 (0.49-0.87) <sup>a</sup>                                                                                                                                                                | 0.65 (0.46 to 0.91)                                   | 0.55 (0.31 to 0.97)                                     |
| Cladribine vs. placebo                  | CLARITY: 0.67 (0.48-0.93)                                                                                                                                                                                          | 0.67 (0.46 to 0.98)                                   | 0.67 (0.45 to 0.98)                                     |
| Dimethyl fumarate vs. placebo           | CONFIRM: 0.79 (0.52-1.19)<br>DEFINE: 0.62 (0.44-0.87)                                                                                                                                                              | 0.66 (0.51 to 0.89)                                   | 0.66 (0.50 to 0.89)                                     |
| Fingolimod vs. placebo                  | FREEDOMS: 0.70 (0.52-0.96)<br>FREEDOMS II: 0.83 (0.61-1.12)                                                                                                                                                        | 0.74 (0.58 to 0.92)                                   | 0.73 (0.58 to 0.93)                                     |
| Fingolimod vs. IFNB-1a IM               | TRANSFORMS: 0.74 <sup>b</sup>                                                                                                                                                                                      | 0.91 (0.66 to 1.27)                                   | 0.91 (0.64 to 1.29)                                     |
| Glatiramer acetate 20 mg vs. IFNB-1b SC | BEYOND: 0.95 <sup>b</sup>                                                                                                                                                                                          | 0.98 (0.74 to 1.30)                                   | 0.98 (0.75 to 1.30)                                     |
| Glatiramer acetate 20 mg vs. placebo    | Bornstein et al., 1987: 0.34 <sup>b</sup><br>Copolymer 1 MS trial: 0.86 <sup>b</sup><br>CONFIRM: 0.93 (0.63-1.37)                                                                                                  | 0.77 (0.58 to 1.02)                                   | 0.78 (0.59 to 1.01)                                     |
| IFNB-1a IM vs. placebo                  | BRAVO: 0.74 (0.51-1.09)                                                                                                                                                                                            | 0.81 (0.60 to 1.08)                                   | 0.81 (0.59 to 1.09)                                     |
| IFNB-1a SC 22 µg vs. placebo            | PRISMS: 0.68 (0.48-0.98)                                                                                                                                                                                           | 0.70 (0.48 to 1.04)                                   | 0.71 (0.47 to 1.03)                                     |
| IFNB-1a SC 44 µg vs. IFNB-1a IM         | EVIDENCE: 0.87 (0.58-1.31)                                                                                                                                                                                         | 0.82 (0.58 to 1.15)                                   | 0.83 (0.59 to 1.17)                                     |
| IFNB-1a SC 44 µg vs. placebo            | PRISMS: 0.62 (0.43-0.91)                                                                                                                                                                                           | 0.66 (0.48 to 0.91)                                   | 0.67 (0.47 to 0.93)                                     |
| IFNB-1b SC vs. placebo                  | INFB MS: 0.70 <sup>b</sup>                                                                                                                                                                                         | 0.79 (0.56 to 1.11)                                   | 0.79 (0.56 to 1.09)                                     |
| Natalizumab vs. placebo                 | AFFIRM: 0.58 (0.43-0.77)                                                                                                                                                                                           | 0.57 (0.41 to 0.81)                                   | 0.57 (0.40 to 0.81)                                     |
| Ocrelizumab vs. IFNB-1a SC 44           | OPERA I: 0.57 (0.37-0.90)<br>OPERA II: 0.63 (0.42-0.92)                                                                                                                                                            | 0.60 (0.44 to 0.82)                                   | 0.60 (0.44 to 0.84)                                     |
| Ofatumumab vs. teriflunomide 14 mg      | ASCLEPIOS I (predefined):<br>0.652 (0.445-0.957)<br>ASCLEPIOS I (EDSS-aligned):<br>0.578 (0.388-0.862)<br>ASCLEPIOS II (predefined):<br>0.660 (0.447-0.947)<br>ASCLEPIOS II (EDSS-aligned):<br>0.615 (0.405-0.936) | 0.65 (0.48 to 0.87)                                   | 0.60 (0.44 to 0.82)                                     |
| Ozanimod vs. IFNB-1a IM                 | RADIANCE-B and SUNBEAM:<br>0.95 (0.68-1.33) <sup>c</sup>                                                                                                                                                           | 0.96 (0.65 to 1.40)                                   | 0.96 (0.65 to 1.39)                                     |
| Ponesimod vs. teriflunomide 14 mg       | OPTIMUM: 0.83 (0.58-1.18)                                                                                                                                                                                          | 0.83 (0.55 to 1.24)                                   | 0.83 (0.55 to 1.24)                                     |
| Teriflunomide 7 mg vs. placebo          | TEMPO: 0.763 (0.555-1.049) <sup>d</sup><br>TOWER: 0.955 (0.677-1.347) <sup>d</sup>                                                                                                                                 | 0.85 (0.66 to 1.11)                                   | 0.85 (0.65 to 1.12)                                     |
| Teriflunomide 14 mg vs. placebo         | TEMPO: 0.702 (0.506-0.973) <sup>d</sup><br>TOWER: 0.685 (0.467-1.004) <sup>d</sup>                                                                                                                                 | 0.70 (0.52 to 0.93)                                   | 0.71 (0.53 to 0.93)                                     |
| Ublituximab vs. teriflunomide 14 mg     | ULTIMATE I/II:<br>0.843 (0.504-1.407) <sup>e,f</sup>                                                                                                                                                               | 0.84 (0.48 to 1.45)                                   | 0.83 (0.48 to 1.45)                                     |

<sup>a</sup> A pooled time to 3mCDP estimate derived from CAMMS223, CARE-MS I, and CARE-MS II was reported in a 2016 HAS meta-analysis [98]. Because CARE-MS I and CARE-MS II do not publicly report the result for the outcome of time to 3mCDP, the decision was made to use the HAS meta-analysis value to include these trials in the time to 3mCDP network. This HAS value was also used by McCool et al. (2019) [99] and Samjoo et al. (2020) [100].

<sup>b</sup> HR was not reported by the specified RCT, so an HR was derived from the reported proportion of patients who progressed over the trial duration for each arm using formulae described by Watkins and Bennett (2018) [97].

<sup>c</sup> Disability progression was assessed as a prespecified pooled analysis of the RADIANCE-B and SUNBEAM trials; values are for the pooled analysis as reported in the RADIANCE pivotal trial publication (Cohen et al. [2019] [30]).

<sup>d</sup> Value to three decimal places obtained from a European Medicines Agency report [93].

<sup>e</sup> Disability progression was assessed as a prespecified pooled analysis of ULTIMATE I and ULTIMATE II.

<sup>f</sup> Value to three decimal places obtained from a conference poster [38].

3mCDP 3-month confirmed disability progression, CrI credible interval, EDSS Expanded Disability Status Scale, HR hazard ratio, IFNB interferon beta, IM intramuscular, RCT randomised controlled trial, SC subcutaneous.

**Table E.3. Comparison of direct evidence and NMA estimates for time to 6mCDP.**

| Comparison                                    | Direct Evidence<br>HR (95% CrI)                                                                                                                                                                                                | Network Meta-analysis<br>HR (95% CrI)<br>(Predefined) | Network Meta-analysis<br>HR (95% CrI)<br>(EDSS-aligned) |
|-----------------------------------------------|--------------------------------------------------------------------------------------------------------------------------------------------------------------------------------------------------------------------------------|-------------------------------------------------------|---------------------------------------------------------|
| Alemtuzumab vs. IFNB-1a SC 44                 | CAMMS223: 0.25 (0.11 to 0.57)<br>CARE-MS I: 0.70 (0.40 to 1.23)<br>CARE-MS II: 0.58 (0.38 to 0.87)                                                                                                                             | 0.53 (0.38 to 0.75)                                   | 0.54 (0.38 to 0.75)                                     |
| Cladribine vs. placebo                        | CLARITY: 0.53 (0.36 to 0.79) <sup>a</sup>                                                                                                                                                                                      | 0.54 (0.33 to 0.85)                                   | 0.54 (0.34 to 0.85)                                     |
| Dimethyl fumarate vs. placebo                 | CONFIRM: 0.62 (0.37 to 1.03)<br>DEFINE: 0.77 (0.52 to 1.14) <sup>b</sup>                                                                                                                                                       | 0.68 (0.47 to 0.95)                                   | 0.68 (0.48 to 0.96)                                     |
| Fingolimod vs. placebo                        | FREEDOMS: 0.63 (0.44 to 0.90)<br>FREEDOMS II: 0.72 (0.48 to 1.07)                                                                                                                                                              | 0.66 (0.48 to 0.91)                                   | 0.67 (0.49 to 0.92)                                     |
| Glatiramer acetate 20 mg vs. IFNB-1a IM       | CombiRx: 1.17 <sup>c</sup>                                                                                                                                                                                                     | 1.08 (0.79 to 1.48)                                   | 1.09 (0.78 to 1.52)                                     |
| Glatiramer acetate 20 mg vs. IFNB 1b SC 44 µg | REGARD: 0.74 <sup>c</sup>                                                                                                                                                                                                      | 0.99 (0.65 to 1.52)                                   | 0.98 (0.65 to 1.48)                                     |
| Glatiramer acetate 20 mg vs. placebo          | CONFIRM: 0.87 (0.55 to 1.38)                                                                                                                                                                                                   | 0.77 (0.53 to 1.11)                                   | 0.79 (0.55 to 1.12)                                     |
| IFNB-1a IM vs. placebo                        | BRAVO: 0.73 (0.47 to 1.14)<br>MSCRG: 0.58 <sup>c</sup>                                                                                                                                                                         | 0.71 (0.52 to 0.98)                                   | 0.72 (0.54 to 0.98)                                     |
| IFNB-1a SC 44 µg vs. IFNB-1a IM               | EVIDENCE: 0.70 (0.39 to 1.25)                                                                                                                                                                                                  | 1.09 (0.69 to 1.71)                                   | 1.12 (0.72 to 1.70)                                     |
| Natalizumab vs. placebo                       | AFFIRM: 0.46 (0.33 to 0.64)                                                                                                                                                                                                    | 0.46 (0.30 to 0.68)                                   | 0.46 (0.31 to 0.69)                                     |
| Ocrelizumab vs. IFNB-1a SC 44                 | OPERA-I: 0.57 (0.34 to 0.95)<br>OPERA-II: 0.63 (0.40 to 0.98)                                                                                                                                                                  | 0.60 (0.41 to 0.88)                                   | 0.60 (0.41 to 0.87)                                     |
| Ofatumumab vs. teriflunomide 14 mg            | ASCLEPIOS I (predefined):<br>0.607 (0.396 to 0.930)<br>ASCLEPIOS I (EDSS-aligned):<br>0.564 (0.361 to 0.880)<br>ASCLEPIOS II (predefined):<br>0.756 (0.489 to 1.170)<br>ASCLEPIOS II (EDSS-aligned):<br>0.671 (0.418 to 1.077) | 0.67 (0.47 to 0.96)                                   | 0.61 (0.42 to 0.89)                                     |
| Ozanimod vs. IFNB-1a IM                       | RADIANCE-B and SUNBEAM:<br>1.41 (0.92 to 2.17) <sup>d</sup>                                                                                                                                                                    | 1.42 (0.86 to 2.34)                                   | 1.40 (0.86 to 2.28)                                     |
| Ponesimod vs. teriflunomide 14 mg             | OPTIMUM: 0.84 (0.57 to 1.24)                                                                                                                                                                                                   | 0.84 (0.53 to 1.33)                                   | 0.85 (0.53 to 1.33)                                     |
| Teriflunomide 7 mg vs. placebo                | TEMSO: 0.750 (0.507 to 1.110) <sup>e</sup><br>TOWER: 1.054 (0.690 to 1.610) <sup>e</sup>                                                                                                                                       | 0.88 (0.63 to 1.24)                                   | 0.88 (0.62 to 1.23)                                     |
| Teriflunomide 14 mg vs. placebo               | TEMSO: 0.749 (0.505 to 1.111) <sup>e</sup><br>TOWER: 0.843 (0.533 to 1.334) <sup>e</sup>                                                                                                                                       | 0.79 (0.56 to 1.12)                                   | 0.78 (0.56 to 1.12)                                     |
| Ublituximab vs. teriflunomide 14 mg           | ULTIMATE I/II:<br>0.657 (0.358 to 1.205) <sup>f,g</sup>                                                                                                                                                                        | 0.66 (0.34 to 1.26)                                   | 0.65 (0.34 to 1.23)                                     |

<sup>a</sup> Obtained from a European Medicines Agency report [101] since not reported by the pivotal trial publication [13].

<sup>b</sup> Obtained from a European Medicines Agency report [95] since not reported by the pivotal trial publication [17].

<sup>c</sup> HR was not reported by the specified RCT, so an HR was derived from the reported proportion of patients who progressed over the trial duration for each arm using formulae described by Watkins and Bennett (2018) [97].

<sup>d</sup> Disability progression was assessed as a prespecified pooled analysis of the RADIANCE-B and SUNBEAM trials; values are for the pooled analysis as reported in the RADIANCE pivotal trial publication [30].

<sup>e</sup> Value to three decimal places obtained from a European Medicines Agency report [93].

<sup>f</sup> Disability progression was assessed as a prespecified pooled analysis of ULTIMATE I and ULTIMATE II.

<sup>g</sup> Value to three decimal places obtained from a conference poster [38].

6mCDP 6-month confirmed disability progression, CrI credible interval, EDSS Expanded Disability Status Scale, HR hazard ratio, IFNB interferon beta, IM intramuscular, RCT randomised controlled trial, SC subcutaneous.

## Appendix F Inconsistency Analysis

**Table F.1. Model fit parameters for the ARR inconsistency analysis.**

| Model                             | DIC    | Total Residual Deviance    | SD (95% CrI)           |
|-----------------------------------|--------|----------------------------|------------------------|
| Consistency (i.e., main analysis) | 671.97 | 98.04 (vs. 85 data points) | 0.114 (0.014 to 0.226) |
| Inconsistency                     | 667.58 | 94.80 (vs. 85 data points) | 0.095 (0.003 to 0.239) |

ARR annualised relapse rate, CrI credible interval, DIC deviance information criterion, SD standard deviation.

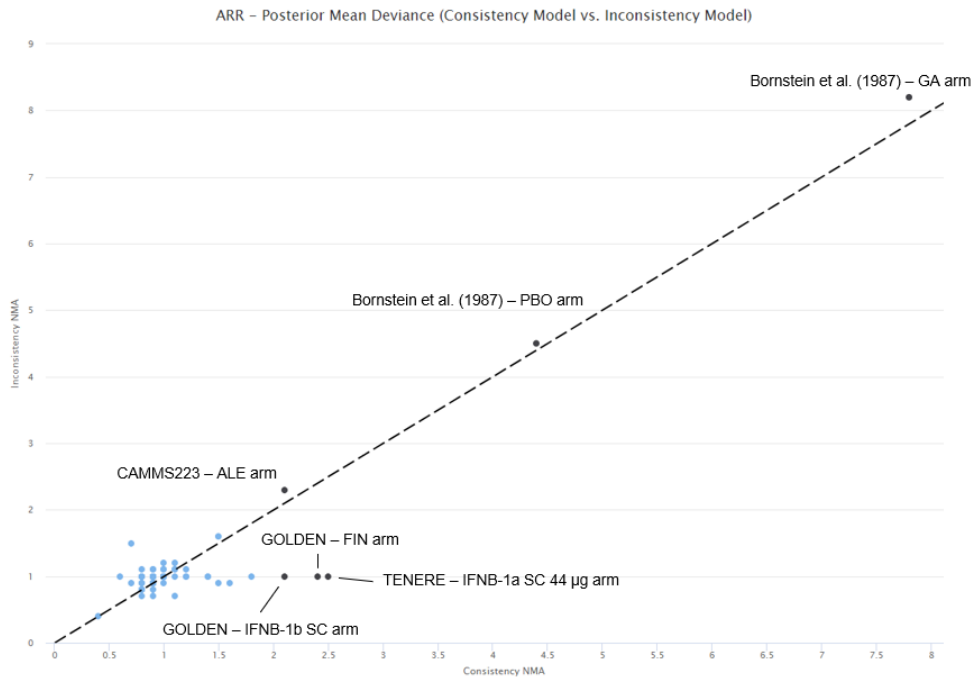

**Figure F.1. Unrelated mean effects scatter plot for the ARR inconsistency analysis.**

Note: Labeled trials had a posterior mean deviance >2 for the consistency model and/or the inconsistency model, and so were identified as potentially contributing to inconsistency.

ALE alemtuzumab, ARR annualised relapse rate, GA glatiramer acetate, IFNB interferon beta, NMA network meta-analysis, PBO placebo, SC subcutaneous.

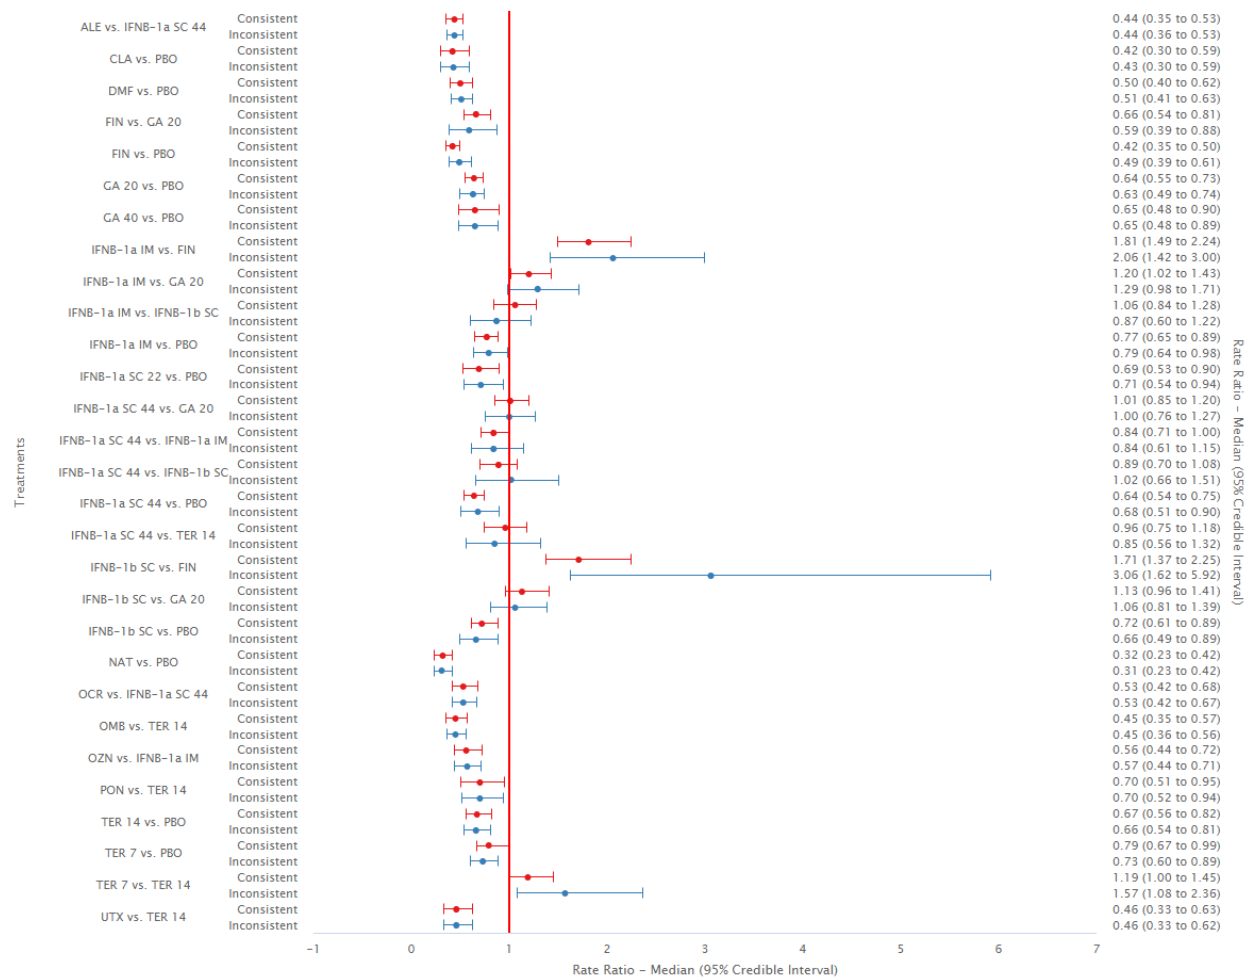

**Figure F.2. Forest plot for ARR inconsistency analysis.**

Note: Results for the consistency model (i.e., main analysis) are red. Results for the inconsistency model are blue. ARR annualised relapse rate.

**Table F.2. Model fit parameters for the time to 3mCDP inconsistency analysis (predefined).**

| Model                             | DIC    | Total Residual Deviance    | SD (95% CrI)           |
|-----------------------------------|--------|----------------------------|------------------------|
| Consistency (i.e., main analysis) | -16.76 | 24.01 (vs. 28 data points) | 0.068 (0.017 to 0.188) |
| Inconsistency                     | -15.46 | 25.56 (vs. 28 data points) | 0.073 (0.017 to 0.223) |

3mCDP 3-month confirmed disability progression, CrI credible interval, DIC deviance information criterion, SD standard deviation.

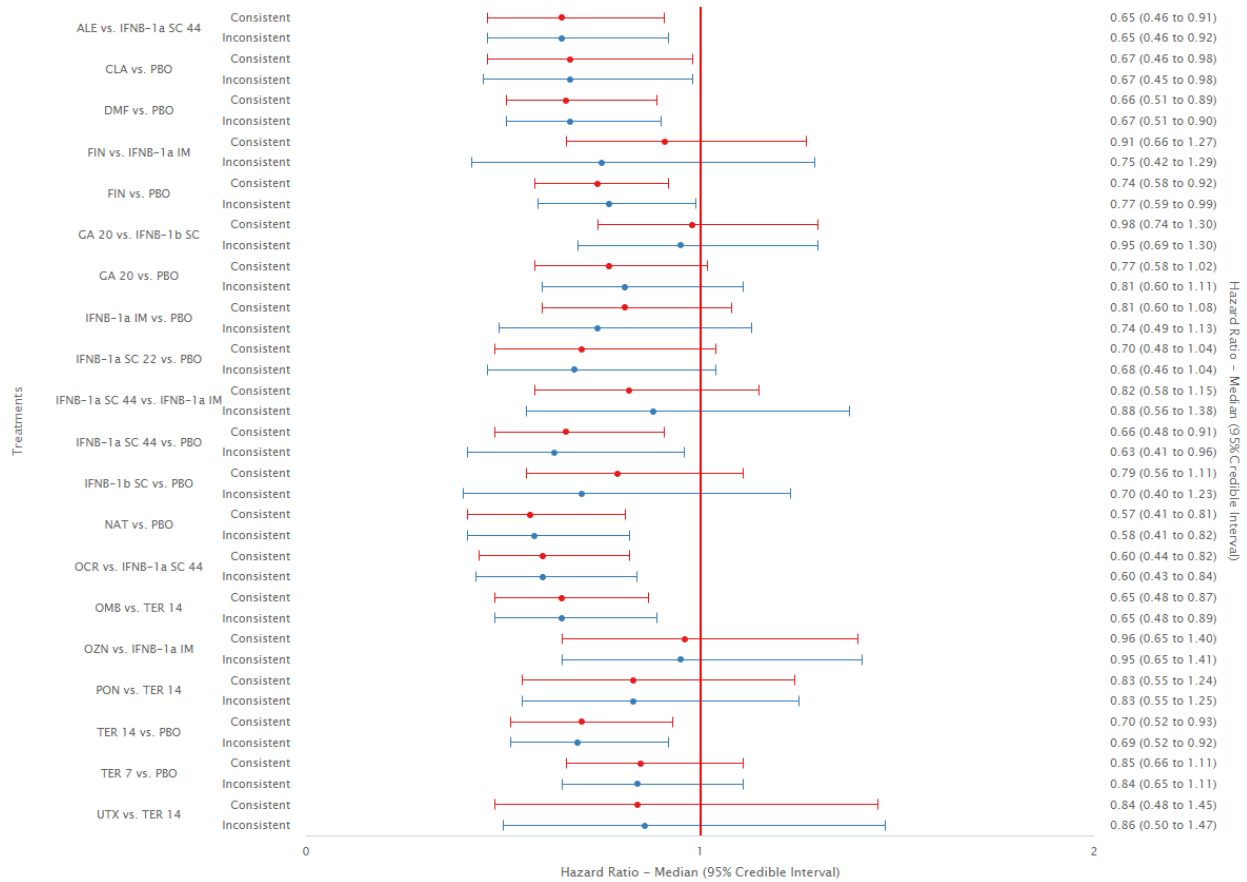

**Figure F.3. Forest plot for the time to 3mCDP inconsistency analysis (predefined).**

Note: Results for the consistency model (i.e., main analysis) are red. Results for the inconsistency model are blue. 3mCDP 3-month confirmed disability progression.

**Table F.3. Model fit parameters for the time to 6mCDP inconsistency analysis (predefined).**

| Model                             | DIC   | Total Residual Deviance    | SD (95% CrI)           |
|-----------------------------------|-------|----------------------------|------------------------|
| Consistency (i.e., main analysis) | -3.55 | 26.91 (vs. 26 data points) | 0.088 (0.020 to 0.264) |
| Inconsistency                     | -5.48 | 24.21 (vs. 26 data points) | 0.084 (0.020 to 0.263) |

6mCDP 6-month confirmed disability progression, CrI credible interval, DIC deviance information criterion, SD standard deviation.

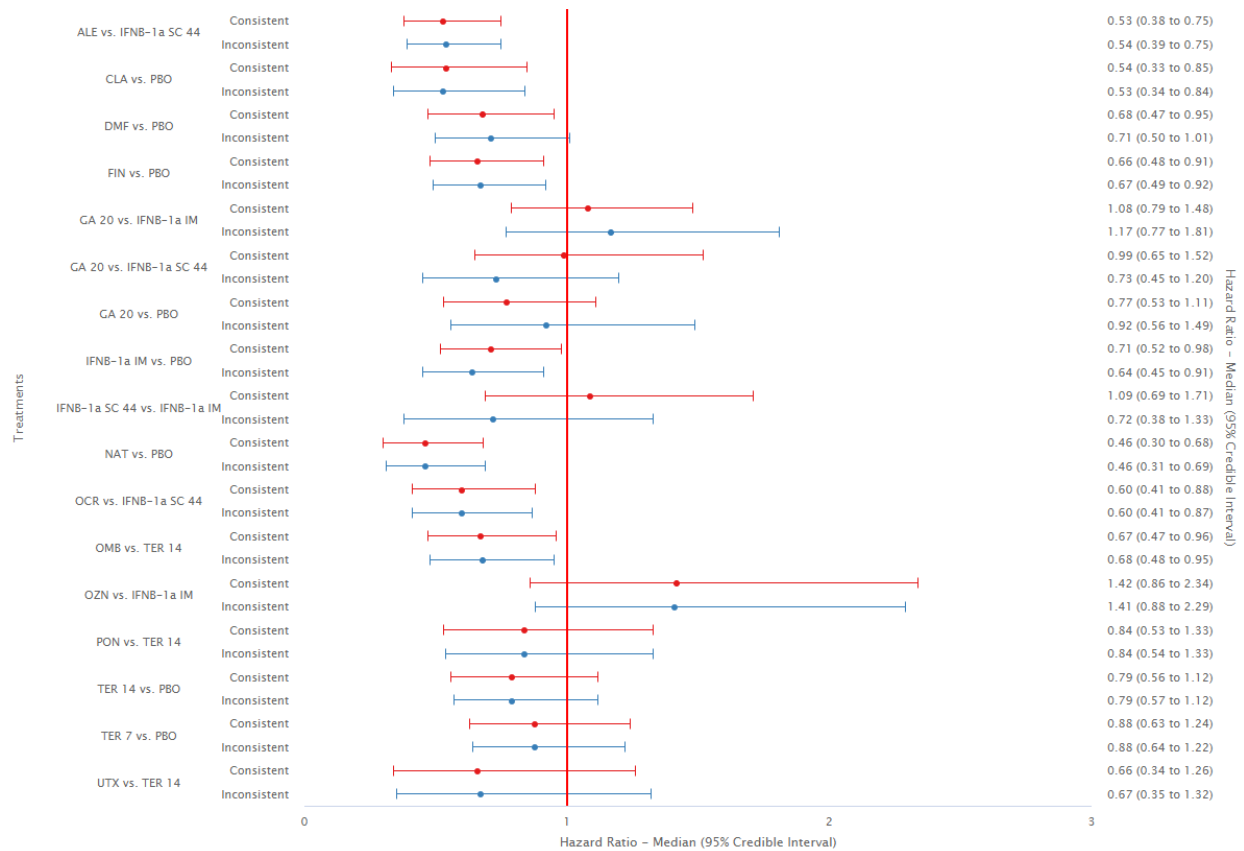

**Figure F.4. Forest plot for the time to 6mCDP inconsistency analysis (predefined).**

Note: Results for the consistency model (i.e., main analysis) are red. Results for the inconsistency model are blue. 6mCDP 6-month confirmed disability progression.

# Appendix G

# Sensitivity Analyses

## Sensitivity analysis #1: Fixed effects models instead of random effects models

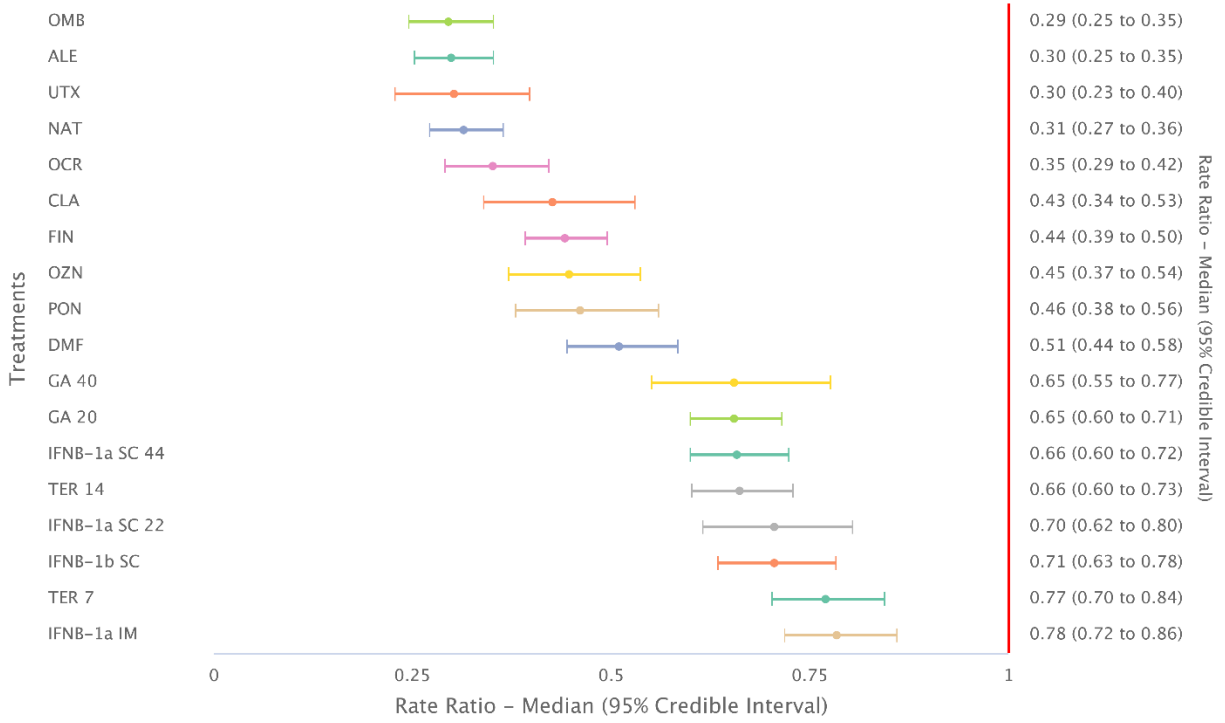

**Figure G.1. ARR network meta-analysis results (treatment vs. placebo) for sensitivity analysis #1 (fixed effects model).**

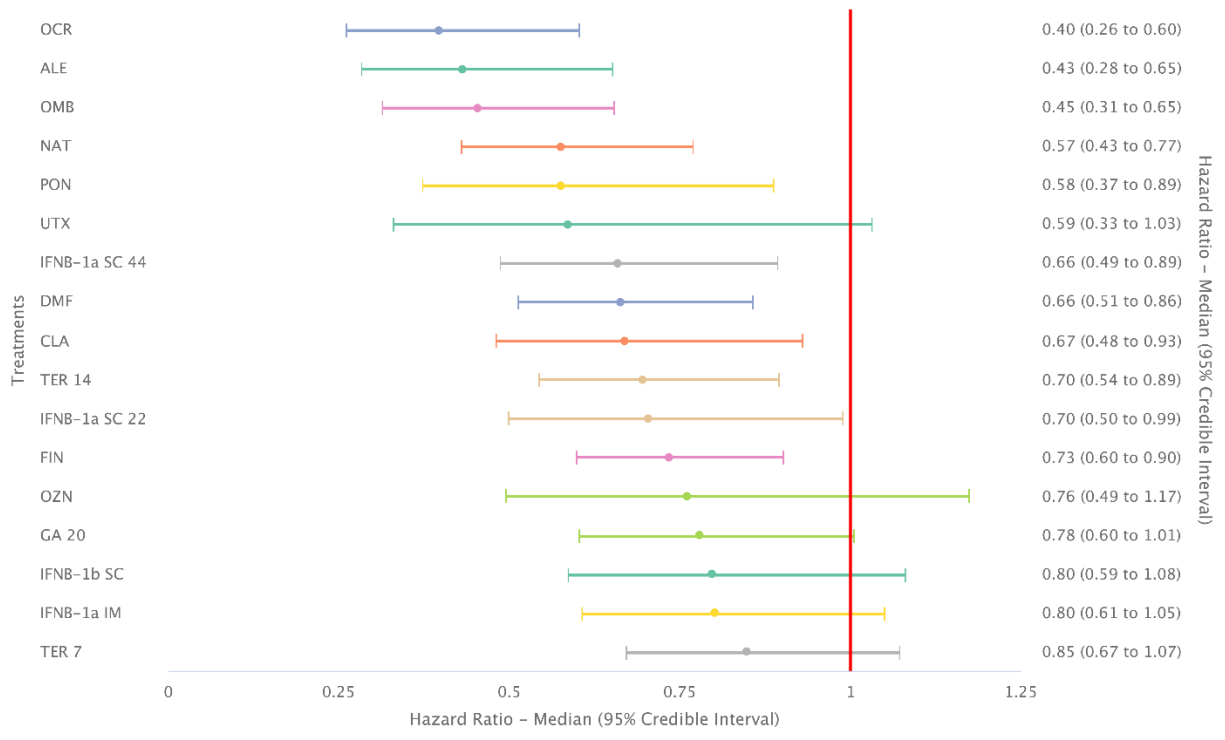

**Figure G.2. Time to 3mCDP network meta-analysis results (treatment vs. placebo) for sensitivity analysis #1 (fixed effects model) (predefined).**

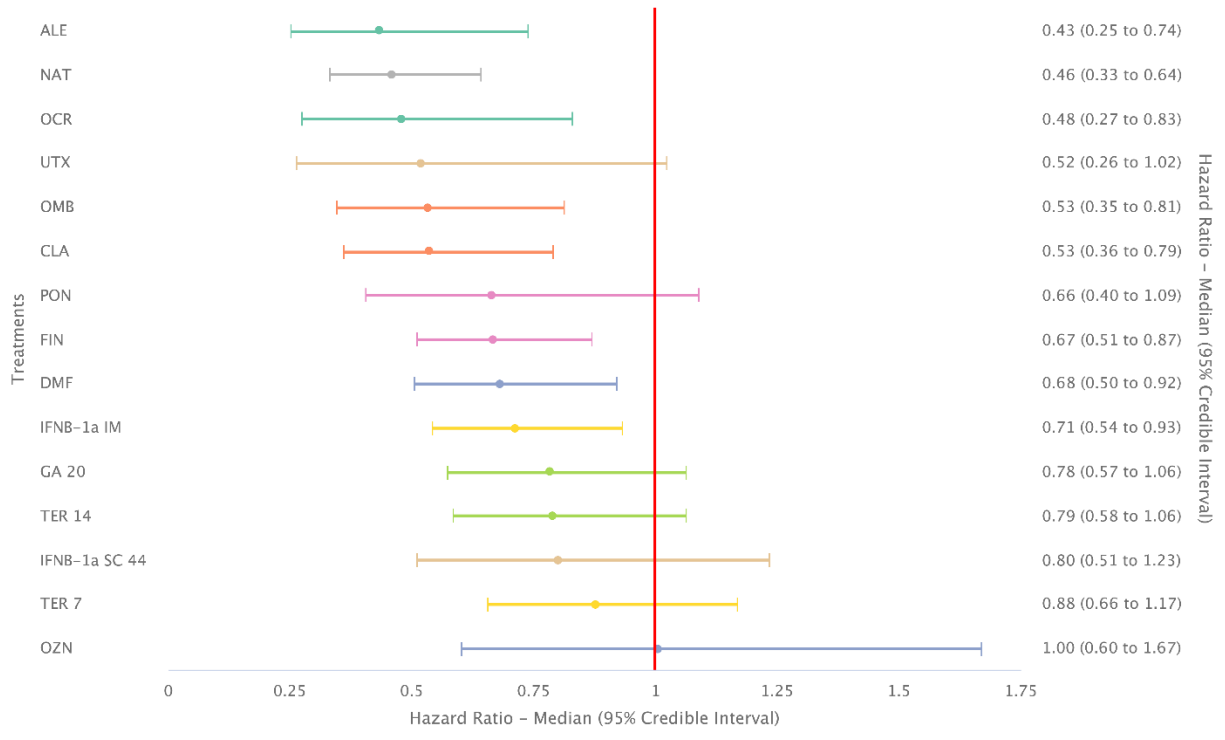

**Figure G.3. Time to 6mCDP network meta-analysis results (treatment vs. placebo) for sensitivity analysis #1 (fixed effects model) (predefined).**

*Sensitivity analysis #2: Inclusion of the ADVANCE trial*

**Table G.1. Input data additions for sensitivity analysis #2 (inclusion of the ADVANCE trial).**

| Trial Name | Treatment | ARR        |             |                                     | 3mCDP                         |                         |          |           | 6mCDP                         |                         |          |           |
|------------|-----------|------------|-------------|-------------------------------------|-------------------------------|-------------------------|----------|-----------|-------------------------------|-------------------------|----------|-----------|
|            |           | ARR (mean) | Sample Size | Trial Duration (weeks) <sup>a</sup> | HR for Time to Event (95% CI) | Proportion with CDP (%) | Ln(HR)   | Ln(HR SE) | HR for Time to Event (95% CI) | Proportion with CDP (%) | Ln(HR)   | Ln(HR SE) |
| ADVANCE    | PBO       | 0.397      | 500         | 48                                  | -                             | 11%                     | NA       | NA        | -                             | 8% <sup>b</sup>         | NA       | NA        |
|            | PEG       | 0.256      | 512         | 48                                  | 0.62 (0.40-0.97)              | 7%                      | -0.47337 | 0.22598   | 0.46 (0.26-0.81) <sup>b</sup> | 4% <sup>b</sup>         | -0.77890 | 0.28989   |

<sup>a</sup> Where trial duration was reported in years or months, it was assumed that 1 year = 12 months and 1 year = 52 weeks.

<sup>b</sup> Obtained from the Summary of Product Characteristics for pegylated interferon beta-1a [94] since not reported by the pivotal trial publication [1].

*3mCDP* 3-month confirmed disability progression, *6mCDP* 6-month confirmed disability progression, *ARR* annualised relapse rate, *CI* confidence interval, *HR* hazard ratio, *NA* not applicable, *PEG* pegylated interferon beta-1a, *PBO* placebo, *SE* standard error.

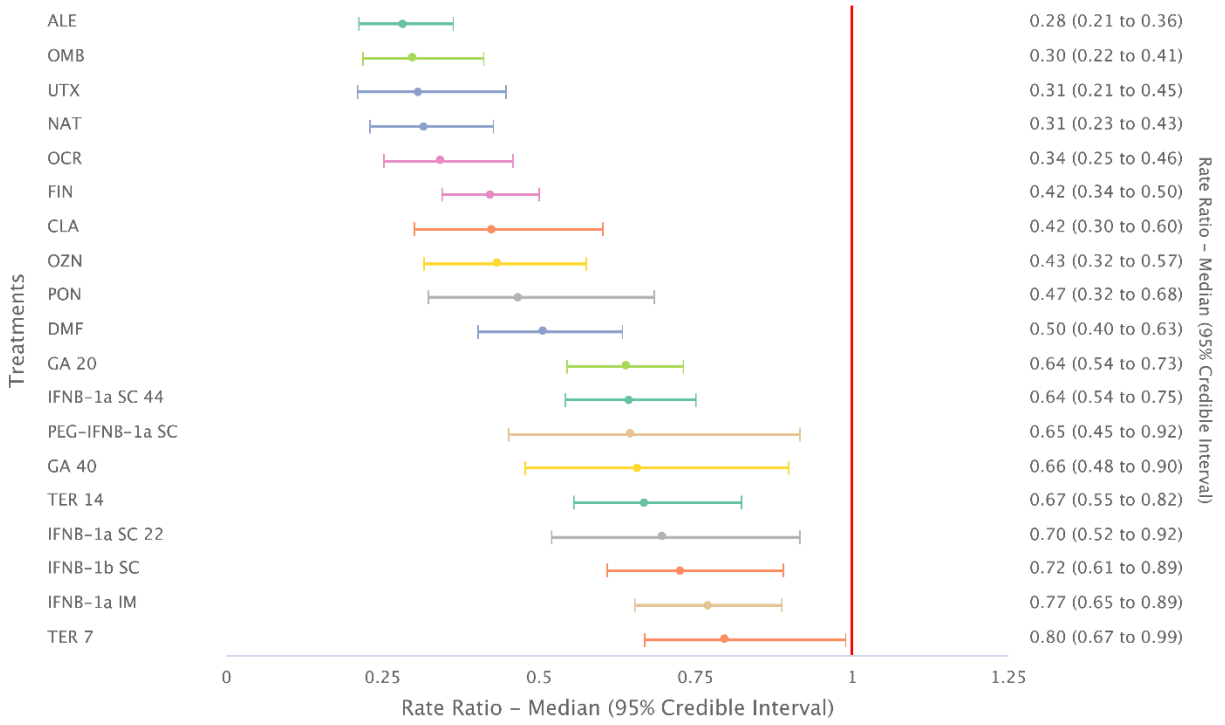

**Figure G.4. ARR network meta-analysis results (treatment vs. placebo) for sensitivity analysis #2 (inclusion of the ADVANCE trial).**

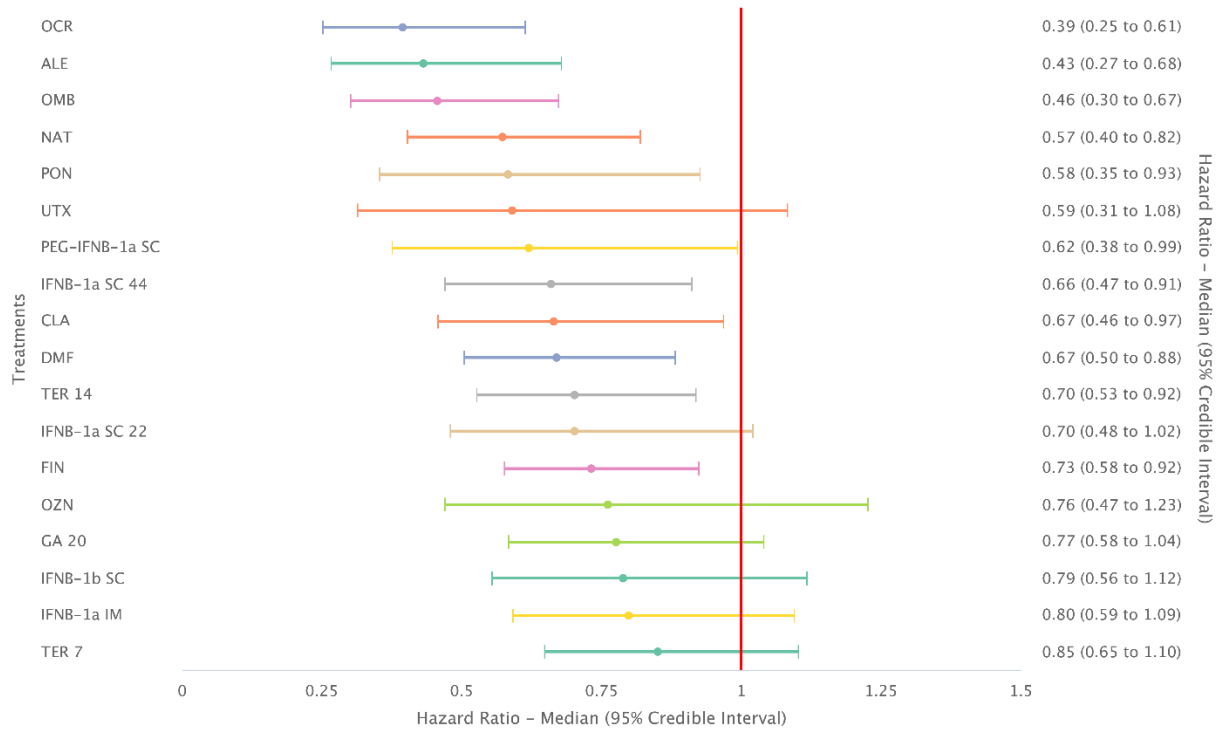

**Figure G.5. Time to 3mCDP network meta-analysis results (treatment vs. placebo) for sensitivity analysis #2 (inclusion of the ADVANCE trial) (predefined).**

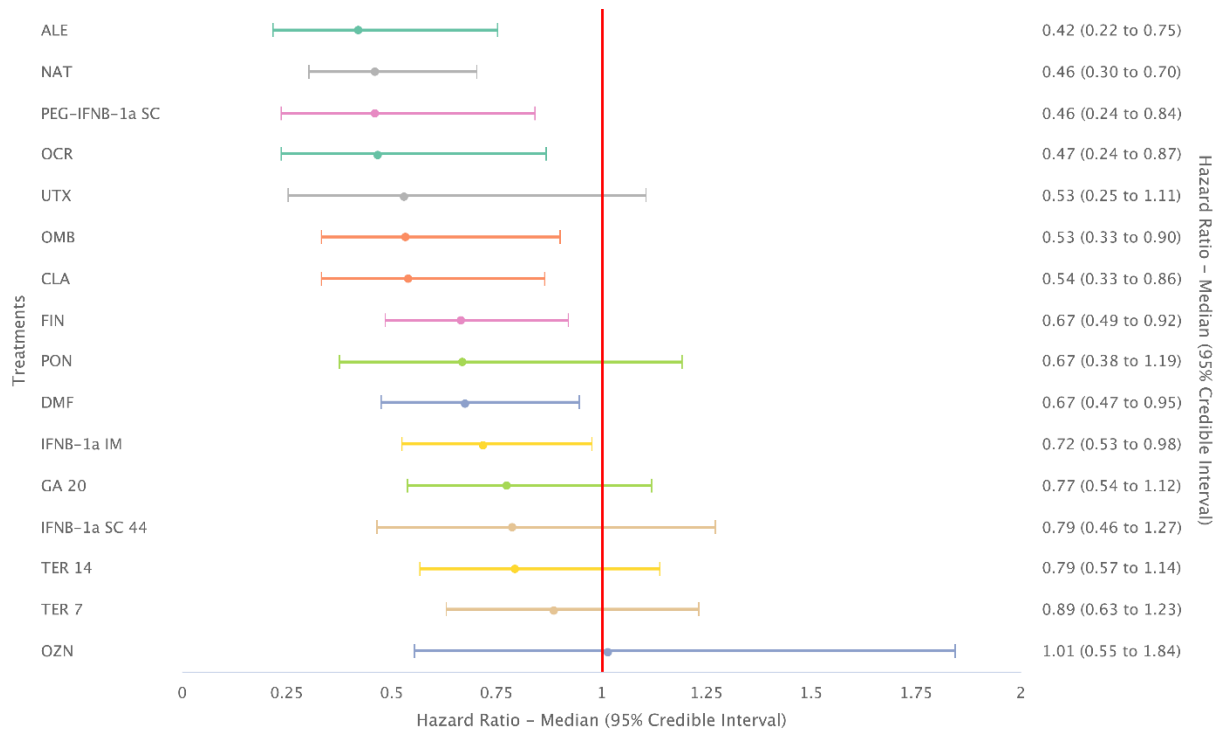

**Figure G.6. Time to 6mCDP network meta-analysis results (treatment vs. placebo) for sensitivity analysis #2 (inclusion of the ADVANCE trial) (predefined).**

*Sensitivity analysis #3: Inclusion of the INCOMIN trial*

**Table G.2. Input data additions for sensitivity analysis #3 (inclusion of the INCOMIN trial).**

| Trial Name | Treatment  | ARR        |             |                                     | 6mCDP                         |                         |                       |                      |
|------------|------------|------------|-------------|-------------------------------------|-------------------------------|-------------------------|-----------------------|----------------------|
|            |            | ARR (mean) | Sample Size | Trial Duration (weeks) <sup>a</sup> | HR for Time to Event (95% CI) | Proportion with CDP (%) | Ln(HR)                | Ln(HR SE)            |
| INCOMIN    | IFNB-1a IM | 0.7        | 92          | 104                                 | -                             | 30%                     | NA                    | NA                   |
|            | IFNB-1b SC | 0.5        | 96          | 104                                 | NR                            | 14%                     | -0.91391 <sup>b</sup> | 0.33640 <sup>b</sup> |

<sup>a</sup> Where trial duration was reported in years or months, it was assumed that 1 year = 12 months and 1 year = 52 weeks.

<sup>b</sup> Derived from the proportion of patients who progressed over the trial duration as per McCool et al. (2019) [99] using the formulae by Watkins and Bennett (2018) [97].  
*6mCDP* 6-month confirmed disability progression, *ARR* annualised relapse rate, *CI* confidence interval, *HR* hazard ratio, *IFNB* interferon beta, *IM* intramuscular, *NA* not applicable, *NR* not reported, *SC* subcutaneous, *SE* standard error.

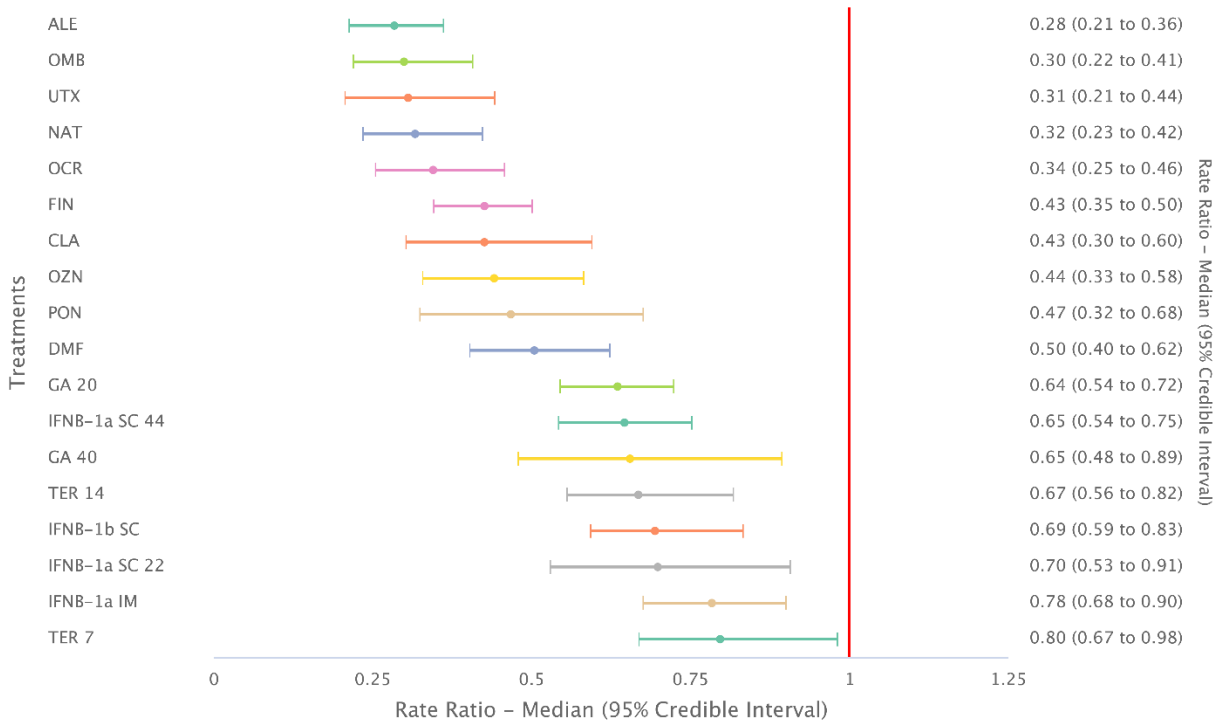

**Figure G.7. ARR network meta-analysis results (treatment vs. placebo) for sensitivity analysis #3 (inclusion of the INCOMIN trial).**

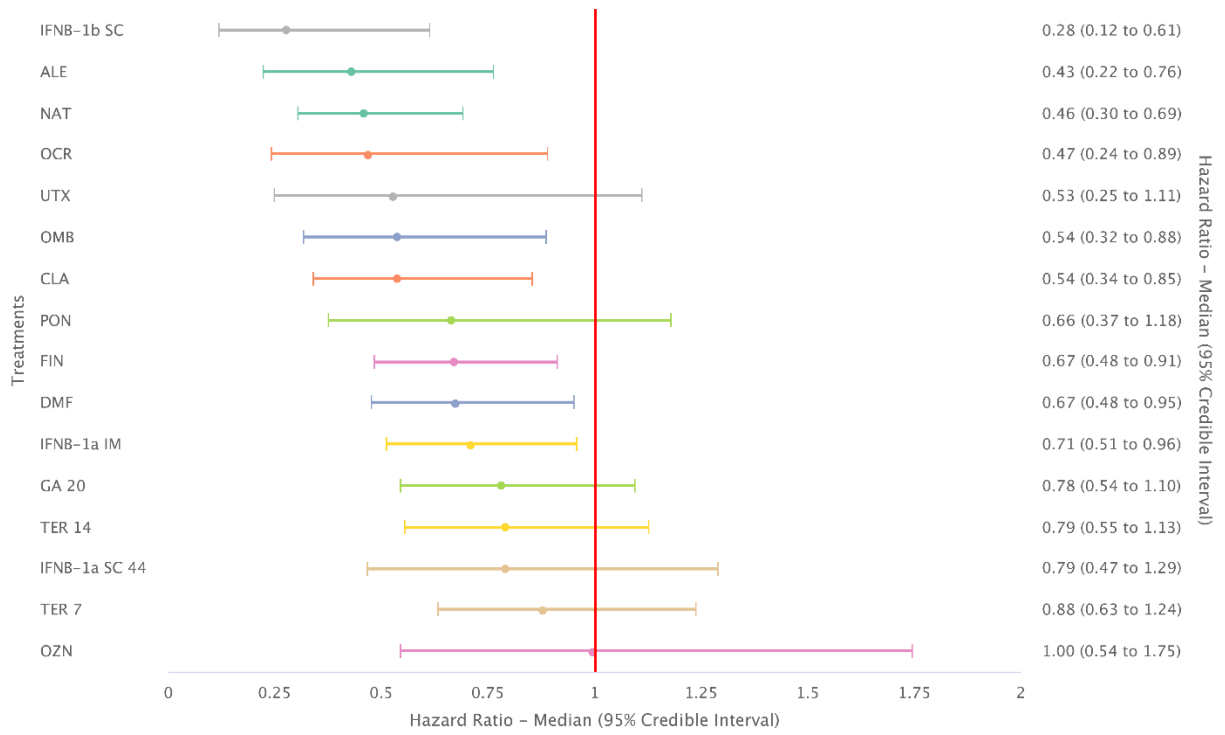

**Figure G.8. Time to 6mCDP network meta-analysis results (treatment vs. placebo) for sensitivity analysis #3 (inclusion of the INCOMIN trial) (predefined).**

***Sensitivity analysis #4: Exclusion of trials identified as potential contributors to ARR analysis inconsistency***

**Table G.3. Trials iteratively excluded in sensitivity analysis #4.**

| <b>Trial Name</b>       | <b>Pivotal Publication Author (Year)</b> | <b>NCT Number</b> | <b>Relevant Treatments</b>                                                    |
|-------------------------|------------------------------------------|-------------------|-------------------------------------------------------------------------------|
| TENERE                  | Vermersch (2014) [35]                    | NCT00883337       | Teriflunomide PO 7 mg QD<br>Teriflunomide PO 14 mg QD<br>IFNB-1a SC 44 µg TIW |
| GOLDEN                  | Comi (2017) [23]                         | NCT01333501       | Fingolimod 0.5 mg PO QD<br>IFNB-1b SC 250 µg Q2D                              |
| Bornstein et al. (1987) | Bornstein (1987) [7]                     | Not available     | Glatiramer acetate SC 20 mg QD<br>Placebo                                     |

Note: These trials were excluded one by one in iterative analyses to assess their contribution to inconsistency. CAMMS223 also had a posterior mean deviance >2 for the consistency model and/or the inconsistency model but did not need to be excluded to address the inconsistency for ARR (i.e., excluding TENERE, GOLDEN, and Bornstein et al. (1987) was sufficient to decrease the DIC to less than 3).

*DIC* deviance information criterion, *IFNB* interferon beta, *PO* oral, *Q2D* once every other day, *QD* once a day, *QW* once a week, *SC* subcutaneous, *TIW* three times a week.

**Table G.4. Model fit parameters for ARR inconsistency analysis for sensitivity analysis #4.**

| <b>Analysis</b>                                                 | <b>DIC for Consistency Model</b> | <b>DIC for Inconsistency Model</b> |
|-----------------------------------------------------------------|----------------------------------|------------------------------------|
| Main analysis                                                   | 671.97                           | 667.58                             |
| Exclusion of TENERE trial                                       | 653.27                           | 647.02                             |
| Exclusion of TENERE and GOLDEN trials                           | 638.54                           | 634.67                             |
| Exclusion of TENERE, GOLDEN, and Bornstein et al. (1987) trials | 614.47                           | 612.86                             |

*ARR* annualised relapse rate, *CrI* credible interval, *DIC* deviance information criterion.

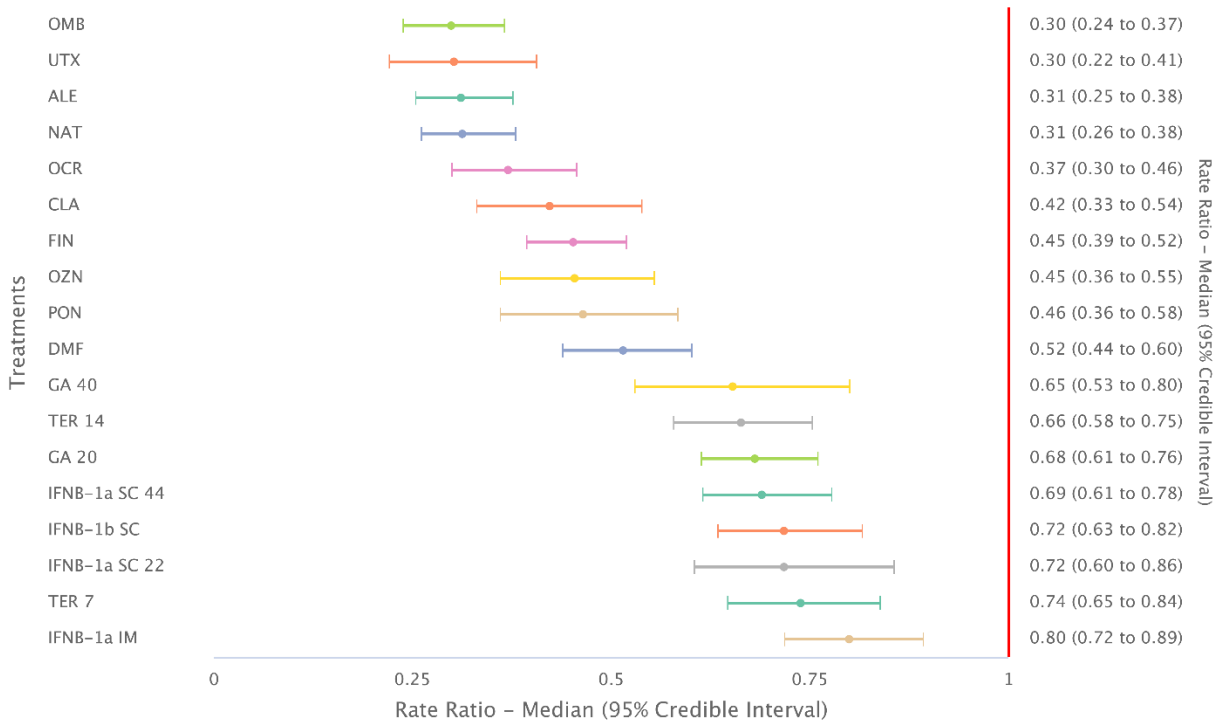

**Figure G.9. ARR network meta-analysis results (treatment vs. placebo) for sensitivity analysis #4 (exclusion of TENERE, GOLDEN, and Bornstein et al. [1987] trials).**

**Sensitivity analysis #5: Only trials published in 2004 or later**

**Table G.5. Trials excluded for sensitivity analysis #5 (only trials published in 2004 or later).**

| Trial Name              | Pivotal Publication Author (Year)               | NCT Number    | Relevant Treatments                                     |
|-------------------------|-------------------------------------------------|---------------|---------------------------------------------------------|
| Bornstein et al. (1987) | Bornstein (1987) [7]                            | Not available | Glatiramer acetate SC 20 mg QD<br>Placebo               |
| Copolymer 1 MS trial    | Johnson (1995) [16]                             | Not available | Glatiramer acetate SC 20 mg QD<br>Placebo               |
| EVIDENCE                | Panitch (2002) [19]                             | Not available | IFNB-1a SC 44 µg TIW<br>IFNB-1a IM 30 µg QW             |
| IFNB MS                 | IFNB Multiple Sclerosis Study Group (1993) [24] | Not available | IFNB-1b SC 250 µg Q2D<br>Placebo                        |
| MSCRG                   | Jacobs (1996) [26]                              | Not available | IFNB-1a IM 30 µg QW<br>Placebo                          |
| PRISMS                  | Ebers (1998) [29]                               | Not available | IFNB-1a SC 22 µg TIW<br>IFNB-1a SC 44 µg TIW<br>Placebo |

Note: Some trials included additional treatment arms not listed here that were outside of the scope of the eligibility criteria for this study.

IFNB interferon beta, IM intramuscular, Q2D once every other day, QD once a day, QW once a week, SC subcutaneous, TIW three times a week.

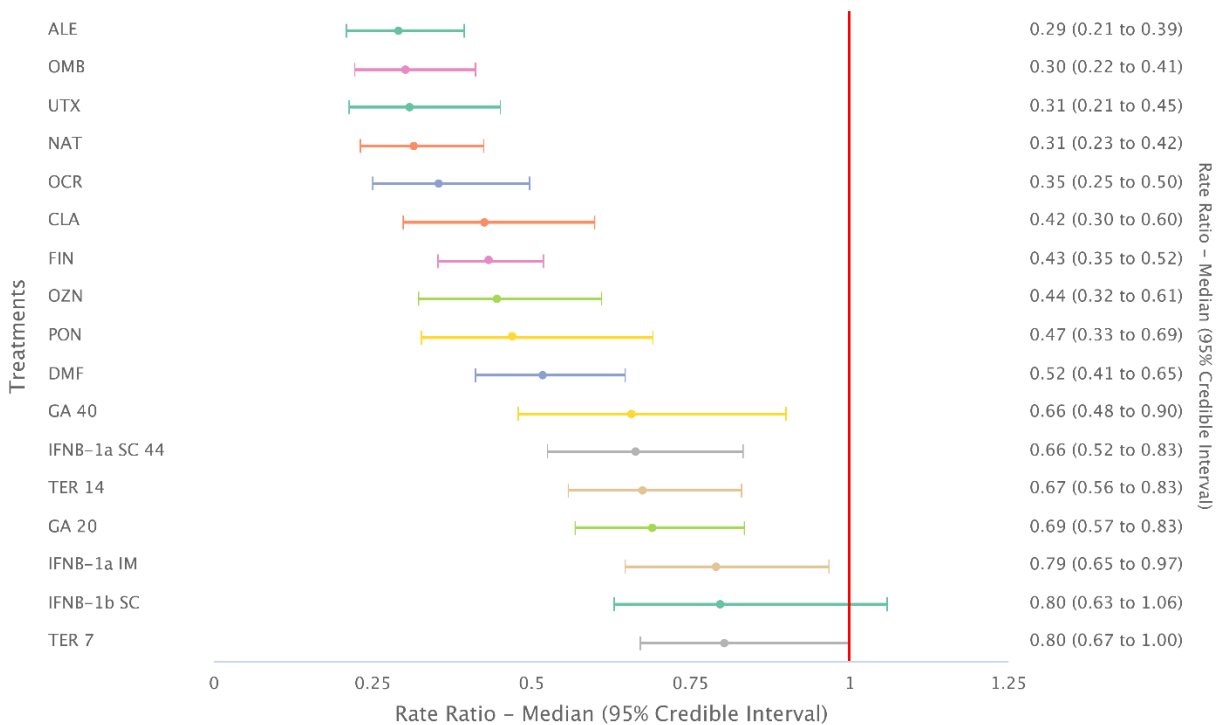

**Figure G.10. ARR network meta-analysis results (treatment vs. placebo) for sensitivity analysis #5 (only trials published in 2004 or later).**

## Reference List

1. Calabresi PA, Kieseier BC, Arnold DL *et al.* Pegylated interferon beta-1a for relapsing-remitting multiple sclerosis (ADVANCE): a randomised, phase 3, double-blind study. *Lancet Neurology*. 2014;13(7):657-65.
2. Polman CH, O'Connor PW, Havrdova E *et al.* A randomized, placebo-controlled trial of natalizumab for relapsing multiple sclerosis. *New England Journal of Medicine*. 2006;354(9):899-910.
3. Hauser SL, Bar-Or A, Cohen JA *et al.* Ofatumumab versus teriflunomide in multiple sclerosis. *New England Journal of Medicine*. 2020;383(6):546-57.
4. Cree BAC, Goldman MD, Corboy JR *et al.* Efficacy and safety of 2 fingolimod doses vs glatiramer acetate for the treatment of patients with relapsing-remitting multiple sclerosis: a randomized clinical trial. *JAMA Neurology*. 2021;78(1):48-60.
5. O'Connor P, Filippi M, Arnason B *et al.* 250 microg or microg interferon beta-1b versus 20 mg glatiramer acetate in relapsing-remitting multiple sclerosis: a prospective, randomised, multicentre study. *Lancet Neurology*. 2009;8(10):889-97.
6. Boiko AN, Lashch NY, Sharanova SN *et al.* A comparative placebo-controlled clinical trial of the efficacy and safety of glatiramer acetate 20 mg in patients with relapsing multiple sclerosis: first-year study results. *Neuroscience and Behavioral Physiology*. 2018;48(3):351-7.
7. Bornstein MB, Miller A, Slagle S *et al.* A pilot trial of Cop 1 in exacerbating-remitting multiple sclerosis. *New England Journal of Medicine*. 1987;317(7):408-14.
8. Vollmer TL, Sorensen PS, Selmaj K *et al.* A randomized placebo-controlled phase III trial of oral laquinimod for multiple sclerosis. *Journal of Neurology*. 2014;261(4):773-83.
9. Calabrese M, Bernardi V, Atzori M *et al.* Effect of disease-modifying drugs on cortical lesions and atrophy in relapsing-remitting multiple sclerosis. *Multiple Sclerosis Journal*. 2012;18(4):418-24.
10. CAMMS223 Trial Investigators. Alemtuzumab vs. interferon beta-1a in early multiple sclerosis. *New England Journal of Medicine*. 2008;359(17):1786-801.
11. Cohen JA, Coles AJ, Arnold DL *et al.* Alemtuzumab versus interferon beta 1a as first-line treatment for patients with relapsing-remitting multiple sclerosis: a randomised controlled phase 3 trial. *Lancet*. 2012;380(9856):1819-28.
12. Coles AJ, Twyman CL, Arnold DL *et al.* Alemtuzumab for patients with relapsing multiple sclerosis after disease-modifying therapy: a randomised controlled phase 3 trial. *Lancet*. 2012;380(9856):1829-39.
13. Giovannoni G, Comi G, Cook S *et al.* A placebo-controlled trial of oral cladribine for relapsing multiple sclerosis. *New England Journal of Medicine*. 2010;362(5):416-26.
14. Lublin FD, Cofield SS, Cutter GR *et al.* Randomized study combining interferon and glatiramer acetate in multiple sclerosis. *Annals of Neurology*. 2013;73(3):327-40.
15. Fox RJ, Miller DH, Phillips JT *et al.* Placebo-controlled phase 3 study of oral BG-12 or glatiramer in multiple sclerosis. *New England Journal of Medicine*. 2012;367(12):1087-97.
16. Johnson KP, Brooks BR, Cohen JA *et al.* Copolymer 1 reduces relapse rate and improves disability in relapsing-remitting multiple sclerosis: results of a phase III multicenter, double-blind, placebo-controlled trial. *Neurology*. 1995;45(7):1268-76.
17. Gold R, Kappos L, Arnold DL *et al.* Placebo-controlled phase 3 study of oral BG-12 for relapsing multiple sclerosis. *New England Journal of Medicine*. 2012;367(12):1098-107.
18. Etemadifar M, Janghorbani M, Shaygannejad V. Comparison of Betaferon, Avonex, and Rebif in treatment of relapsing-remitting multiple sclerosis. *Acta Neurologica Scandinavica*. 2006;113(5):283-7.
19. Panitch H, Goodin DS, Francis G *et al.* Randomized, comparative study of interferon beta-1a treatment regimens in MS: the EVIDENCE trial. *Neurology*. 2002;59(10):1496-506.
20. Kappos L, Radue E-W, O'Connor P *et al.* A placebo-controlled trial of oral fingolimod in relapsing multiple sclerosis. *New England Journal of Medicine*. 2010;362(5):387-401.

21. Calabresi PA, Radue E-W, Goodin D *et al.* Safety and efficacy of fingolimod in patients with relapsing-remitting multiple sclerosis (FREEDOMS II): a double-blind, randomised, placebo-controlled, phase 3 trial. *Lancet Neurology*. 2014;13(6):545-56.
22. Khan O, Rieckmann P, Boyko A, Selmaj K, Zivadinov R, GALA Study Group. Three times weekly glatiramer acetate in relapsing-remitting multiple sclerosis. *Annals of Neurology*. 2013;73(6):705-13.
23. Comi G, Patti F, Rocca MA *et al.* Efficacy of fingolimod and interferon beta-1b on cognitive, MRI, and clinical outcomes in relapsing-remitting multiple sclerosis: an 18-month, open-label, rater-blinded, randomised, multicentre study (the GOLDEN study). *Journal of Neurology*. 2017;264(12):2436-49.
24. IFNB Multiple Sclerosis Study Group. Interferon beta-1b is effective in relapsing-remitting multiple sclerosis. I. Clinical results of a multicenter, randomized, double-blind, placebo-controlled trial. *Neurology*. 1993;43(4):655-.
25. Durelli L, Verdun E, Barbero P *et al.* Every-other-day interferon beta-1b versus once-weekly interferon beta-1a for multiple sclerosis: results of a 2-year prospective randomised multicentre study (INCOMIN). *Lancet*. 2002;359(9316):1453-60.
26. Jacobs LD, Cookfair DL, Rudick RA *et al.* Intramuscular interferon beta-1a for disease progression in relapsing multiple sclerosis. *Annals of Neurology*. 1996;39(3):285-94.
27. Hauser SL, Bar-Or A, Comi G *et al.* Ocrelizumab versus interferon beta-1a in relapsing multiple sclerosis. *New England Journal of Medicine*. 2017;376(3):221-34.
28. Kappos L, Fox RJ, Burcklen M *et al.* Ponesimod compared with teriflunomide in patients with relapsing multiple sclerosis in the active-comparator phase 3 OPTIMUM study: a randomized clinical trial. *JAMA Neurology*. 2021;78(5):558-67.
29. Ebers GC, PRISMS Study Group. Randomised double-blind placebo-controlled study of interferon beta-1a in relapsing/remitting multiple sclerosis. *Lancet*. 1998;352(9139):1498-504.
30. Cohen JA, Comi G, Selmaj KW *et al.* Safety and efficacy of ozanimod versus interferon beta-1a in relapsing multiple sclerosis (RADIANCE): a multicentre, randomised, 24-month, phase 3 trial. *Lancet Neurology*. 2019;18(11):1021-33.
31. Mikol DD, Barkhof F, Chang P *et al.* Comparison of subcutaneous interferon beta-1a with glatiramer acetate in patients with relapsing multiple sclerosis (the REbif vs Glatiramer Acetate in Relapsing MS Disease [REGARD] study): a multicentre, randomised, parallel, open-label trial. *Lancet Neurology*. 2008;7(10):903-14.
32. Stępień A, Chalimoniuk M, Lubina-Dąbrowska N, Chrapusta SJ, Galbo H, Langfort J. Effects of interferon beta-1a and interferon beta-1b monotherapies on selected serum cytokines and nitrite levels in patients with relapsing-remitting multiple sclerosis: a 3-year longitudinal study. *Neuroimmunomodulation*. 2013;20(4):213-22.
33. Comi G, Kappos L, Selmaj KW *et al.* Safety and efficacy of ozanimod versus interferon beta-1a in relapsing multiple sclerosis (SUNBEAM): a multicentre, randomised, minimum 12-month, phase 3 trial. *Lancet Neurology*. 2019;18(11):1009-20.
34. O'Connor P, Wolinsky JS, Confavreux C *et al.* Randomized trial of oral teriflunomide for relapsing multiple sclerosis. *New England Journal of Medicine*. 2011;365(14):1293-303.
35. Vermersch P, Czonkowska A, Grimaldi LM *et al.* Teriflunomide versus subcutaneous interferon beta-1a in patients with relapsing multiple sclerosis: a randomised, controlled phase 3 trial. *Multiple Sclerosis Journal*. 2014;20(6):705-16.
36. Confavreux C, O'Connor P, Comi G *et al.* Oral teriflunomide for patients with relapsing multiple sclerosis (TOWER): a randomised, double-blind, placebo-controlled, phase 3 trial. *Lancet Neurology*. 2014;13(3):247-56.
37. Cohen JA, Barkhof F, Comi G *et al.* Oral fingolimod or intramuscular interferon for relapsing multiple sclerosis. *New England Journal of Medicine*. 2010;362(5):402-15.
38. Steinman L, Fox E, Hartung H-P *et al.* Efficacy and safety of ublituximab vs teriflunomide in patients with relapsing multiple sclerosis: results from two phase 3 studies ULTIMATE I & ULTIMATE II. 2021. [Poster]. American Academy of Neurology Virtual Annual Meeting, April 17–22.

39. Steinman L, Fox E, Hartung H-P *et al.* Ublituximab versus teriflunomide in relapsing multiple sclerosis. *New England Journal of Medicine.* 2022;387(8):704-14.
40. Comi G, Jeffery D, Kappos L *et al.* Placebo-controlled trial of oral laquinimod for multiple sclerosis. *New England Journal of Medicine.* 2012;366(11):1000-9.
41. Saida T, Yamamura T, Kondo T *et al.* A randomized placebo-controlled trial of delayed-release dimethyl fumarate in patients with relapsing-remitting multiple sclerosis from East Asia and other countries. *BMC Neurology.* 2019;19(1):5.
42. Kira JI, Nakahara J, Sazonov D *et al.* Efficacy and safety of ofatumumab versus placebo in relapsing multiple sclerosis patients in Japan and Russia: results from the phase 2 APOLITOS study. *Multiple Sclerosis Journal.* 2020;26(S3):219.
43. Kapoor R, Ho P-R, Campbell N *et al.* Effect of natalizumab on disease progression in secondary progressive multiple sclerosis (ASCEND): a phase 3, randomised, double-blind, placebo-controlled trial with an open-label extension. *The Lancet Neurology.* 2018;17(5):405-15.
44. Barbero P, Verdun E, Bergui M *et al.* High-dose, frequently administered interferon beta therapy for relapsing-remitting multiple sclerosis must be maintained over the long term: the interferon beta dose-reduction study. *Journal of the Neurological Sciences.* 2004;222(1):13-9.
45. Bastianello S, Pozzilli C, D'Andrea F *et al.* A controlled trial of mitoxantrone in multiple sclerosis: serial MRI evaluation at one year. *Canadian Journal of Neurological Sciences.* 1994;21(3):266-70.
46. Boyko A, Zinkina-Orikhan A, Linkova Y. 20-week results of the phase 3, multicenter, double-blind, placebo-controlled study of the original pegylated interferon beta-1a drug in patients with relapsing multiple sclerosis. *Multiple Sclerosis Journal.* 2019;25(S2):863.
47. Cadavid D, Wolansky LJ, Skurnick J *et al.* Efficacy of treatment of MS with IFN $\beta$ -1b or glatiramer acetate by monthly brain MRI in the BECOME study. *Neurology.* 2009;72(23):1976-83.
48. Boiko AN, Bosenko LP, Vasilovskii VV *et al.* A comparative placebo-controlled clinical trial of the efficacy and safety of interferon beta-1a formulations for subcutaneous administration in patients with relapsing multiple sclerosis: first-year results. *Neuroscience and Behavioral Physiology.* 2018;48(7):883-9.
49. Selmaj K, Li DKB, Hartung H-P *et al.* Siponimod for patients with relapsing-remitting multiple sclerosis (BOLD): an adaptive, dose-ranging, randomised, phase 2 study. *Lancet Neurology.* 2013;12(8):756-67.
50. Cheshmavar M, Mirmosayyeb O, Badihian N, Badihian S, Shaygannejad V. Rituximab and glatiramer acetate in secondary progressive multiple sclerosis: a randomized clinical trial. *Acta Neurologica Scandinavica.* 2021;143(2):178-87.
51. Comi G, Vollmer T, Boyko A *et al.* CONCERTO: A placebo-controlled trial of oral laquinimod in patients with relapsing-remitting multiple sclerosis. *Multiple Sclerosis Journal.* 2017;23(S3):74-5.
52. Cutter G, Veneziano A, Grinspan A *et al.* Higher satisfaction and adherence with glatiramer acetate 40 mg/mL TIW vs 20 mg/mL QD in RRMS. *Multiple Sclerosis and Related Disorders.* 2019;33:13-21.
53. De Castro S, Cartoni D, Millefiorini E *et al.* Noninvasive assessment of mitoxantrone cardiotoxicity in relapsing remitting multiple sclerosis. *Journal of Clinical Pharmacology.* 1995;35(6):627-32.
54. Fox RJ, Wiendl H, Wolf C *et al.* A double-blind, randomized, placebo-controlled phase 2 trial evaluating the selective dihydroorotate dehydrogenase inhibitor vidofludimus calcium in relapsing-remitting multiple sclerosis. *Annals of Clinical and Translational Neurology.* 2022;9(7):977-87.
55. Kappos L, European Study Group on Interferon  $\beta$ -1b in Secondary Progressive MS. Placebo-controlled multicentre randomised trial of interferon  $\beta$ -1b in treatment of secondary progressive multiple sclerosis. *Lancet.* 1998;352(9139):1491-7.
56. Comi G, Filippi M, Wolinsky JS, European/Canadian Glatiramer Acetate Study Group. European/Canadian multicenter, double-blind, randomized, placebo-controlled study of the effects of glatiramer acetate on magnetic resonance imaging-measured disease activity and burden in patients with relapsing multiple sclerosis. *Annals of Neurology.* 2001;49(3):290-7.
57. Kappos L, Bar-Or A, Cree BAC *et al.* Siponimod versus placebo in secondary progressive multiple sclerosis (EXPAND): a double-blind, randomised, phase 3 study. *Lancet.* 2018;391(10127):1263-73.

58. Cohen J, Belova A, Selmaj K *et al.* Equivalence of generic glatiramer acetate in multiple sclerosis: a randomized clinical trial. *JAMA Neurology*. 2015;72(12):1433-41.
59. Popova EV, Boiko AN, Boiko OV *et al.* Results of a randomized open multicenter comparative study of the tolerability and safety of Gilenya (fingolimod) in patients with relapsing multiple sclerosis (the GIMN study). *Neuroscience and Behavioral Physiology*. 2017;47(1):102-6.
60. Gisleskog PO, Valenzuela B, Scherz T, Burcklen M, Pérez-Ruixo JJ, Poggesi I. An exposure-response analysis of the clinical efficacy of ponesimod in a randomized phase II study in patients with multiple sclerosis. *Clinical Pharmacokinetics*. 2021;60(9):1227-37.
61. Wolinsky JS, Borresen TE, Dietrich DW *et al.* GLACIER: an open-label, randomized, multicenter study to assess the safety and tolerability of glatiramer acetate 40 mg three-times weekly versus 20 mg daily in patients with relapsing-relapsing multiple sclerosis. *Multiple Sclerosis and Related Disorders*. 2015;4(4):370-6.
62. Gobbi C, Meier DS, Cotton F *et al.* Interferon beta 1b following natalizumab discontinuation: one year, randomized, prospective, pilot trial. *BMC Neurology*. 2013;13(1):101.
63. Hauser SL, Waubant E, Arnold DL *et al.* B-cell depletion with rituximab in relapsing-relapsing multiple sclerosis. *New England Journal of Medicine*. 2008;358(7):676-88.
64. De Stefano N, Curtin F, Stubinski B *et al.* Rapid benefits of a new formulation of subcutaneous interferon beta-1a in relapsing-relapsing multiple sclerosis. *Multiple Sclerosis Journal*. 2010;16(7):888-92.
65. Kappos L, Li D, Calabresi PA *et al.* Ocrelizumab in relapsing-relapsing multiple sclerosis: a phase 2, randomised, placebo-controlled, multicentre trial. *Lancet*. 2011;378(9805):1779-87.
66. Knobler R, Greenstein J, Johnson K *et al.* Systemic recombinant human interferon- $\beta$  treatment of relapsing-relapsing multiple sclerosis: pilot study analysis and six-year follow-up. *Journal of Interferon Research*. 1993;13(5):333-40.
67. Kuhle J, Kappos L, Montalban X *et al.* The effect of evobrutinib, a Bruton's tyrosine kinase inhibitor, on blood neurofilament light chain levels in relapsing multiple sclerosis. 2021.
68. Comi G, Pulizzi A, Rovaris M *et al.* Effect of laquinimod on MRI-monitored disease activity in patients with relapsing-relapsing multiple sclerosis: a multicentre, randomised, double-blind, placebo-controlled phase IIb study. *Lancet*. 2008;371(9630):2085-92.
69. Llufriu S, Sepúlveda M, Blanco Y *et al.* Randomized placebo-controlled phase II trial of autologous mesenchymal stem cells in multiple sclerosis. *PLOS ONE*. 2014;9(12):e113936.
70. Millefiorini E, Gasperini C, Pozzilli C *et al.* Randomized placebo-controlled trial of mitoxantrone in relapsing-relapsing multiple sclerosis: 24-month clinical and MRI outcome. *Journal of Neurology*. 1997;244(3):153-9.
71. Sorensen PS, Lisby S, Grove R *et al.* Safety and efficacy of ofatumumab in relapsing-relapsing multiple sclerosis: a phase 2 study. *Neurology*. 2014;82(7):573-81.
72. Mokhber N, Azarpazhooh A, Orouji E *et al.* Cognitive dysfunction in patients with multiple sclerosis treated with different types of interferon beta: a randomized clinical trial. *Journal of the Neurological Sciences*. 2014;342(1):16-20.
73. Nabavi M, Abolfazli R, Beladimoghadam N *et al.* A randomized double blind non-inferiority study of efficacy, safety and tolerability of Actorif versus Rebif in patients with relapsing-relapsing MS. *Neuroepidemiology*. 2013;41(3-4):259.
74. Nabavi SM, Abolfazli R, Etemadrezaei A *et al.* A comparison study of efficacy and safety of a biosimilar form of intramuscular beta-interferon 1-a versus the reference product: a randomized controlled clinical trial in Iran. *Iranian Journal of Pharmaceutical Research*. 2019;18(3):1632-8.
75. Nafissi S, Azimi A, Amini-Harandi A, Salami S, Shahkarami MA, Heshmat R. Comparing efficacy and side effects of a weekly intramuscular biogeneric/biosimilar interferon beta-1a with Avonex in relapsing-relapsing multiple sclerosis: a double blind randomized clinical trial. *Clinical Neurology and Neurosurgery*. 2012;114(7):986-9.
76. Foley J, Defer G, Ryerson LZ *et al.* Primary results of NOVA: a randomized controlled study of the efficacy of 6 week dosing of natalizumab versus continued 4-week treatment 2021.

77. O'Connor PW, Li D, Freedman MS *et al.* A phase II study of the safety and efficacy of teriflunomide in multiple sclerosis with relapses. *Neurology*. 2006;66(6):894-900.
78. Olsson T, Boster A, Fernández Ó *et al.* Oral ponesimod in relapsing-remitting multiple sclerosis: a randomised phase II trial. *Journal of Neurology, Neurosurgery and Psychiatry*. 2014;85(11):1198-208.
79. Pakdaman H, Abbasi M, Gharagozli K, Ashrafi F, Kasmaei H, Harandi A. A randomized double-blind trial of comparative efficacy and safety of Avonex and CinnoVex for treatment of relapsing-remitting multiple sclerosis. *Neurological Sciences*. 2018;39(12):2107-13.
80. Polman C, Barkhof F, Sandberg-Wollheim M, Linde A, Nordle O, Nederman T. Treatment with laquinimod reduces development of active MRI lesions in relapsing MS. *Neurology*. 2005;64(6):987-91.
81. Trojano M, Ramio-Torrenta L, Grimaldi L *et al.* Subcutaneous natalizumab 300mg every 4 weeks is comparable to standard intravenous dosing in REFINO: a study exploring the safety, tolerability, and efficacy of multiple natalizumab treatment regimens in patients with relapsing multiple sclerosis. *Neurology*. 2015;85(4):e46.
82. Singer B, Bandari D, Cascione M *et al.* Comparative injection-site pain and tolerability of subcutaneous serum-free formulation of interferon  $\beta$ -1a versus subcutaneous interferon  $\beta$ -1b: results of the randomized, multicenter, phase IIIb REFORMS study. *BMC Neurology*. 2012;12(1):154.
83. Fox RJ, Cree BAC, De Sèze J *et al.* MS disease activity in RESTORE: a randomized 24-week natalizumab treatment interruption study. *Neurology*. 2014;82(17):1491-8.
84. Butzkueven H, Jeffery D, Arnold DL *et al.* The rapid efficacy of natalizumab vs fingolimod in patients with active relapsing-remitting multiple sclerosis (RRMS): results from reveal, a randomised, head-to-head study. *Journal of Neurology, Neurosurgery and Psychiatry*. 2018;89(6):A35-A.
85. Saida T, Kikuchi S, Itoyama Y *et al.* A randomized, controlled trial of fingolimod (FTY720) in Japanese patients with multiple sclerosis. *Multiple Sclerosis Journal*. 2012;18(9):1269-77.
86. Saida T, Kira J-i, Kishida S *et al.* Efficacy, safety, and pharmacokinetics of natalizumab in Japanese multiple sclerosis patients: a double-blind, randomized controlled trial and open-label pharmacokinetic study. *Multiple Sclerosis and Related Disorders*. 2017;11:25-31.
87. SPECTRIMS Study Group. Randomized controlled trial of interferon beta-1a in secondary progressive MS. *Neurology*. 2001;56(11):1496-504.
88. Cadavid D, Mellion M, Hupperts R *et al.* Safety and efficacy of opicinumab in patients with relapsing multiple sclerosis (SYNERGY): a randomised, placebo-controlled, phase 2 trial. *Lancet Neurology*. 2019;18(9):845-56.
89. Tran JQ, Rana J, Barkhof F *et al.* Randomized phase I trials of the safety/tolerability of anti-LINGO-1 monoclonal antibody BIIB033. *Neurology Neuroimmunology & Neuroinflammation*. 2014;1(2):e18.
90. Wroe S. Effects of dose titration on tolerability and efficacy of interferon beta-1b in people with multiple sclerosis. *Journal of International Medical Research*. 2005;33(3):309-18.
91. Ziemssen T, Tumani H, Sehr T *et al.* Safety and in vivo immune assessment of escalating doses of oral laquinimod in patients with RRMS. *Journal of Neuroinflammation*. 2017;14(1):172.
92. Coyle PK, Reder AT, Freedman MS, Fang J, Dangond F. Early MRI results and odds of attaining 'no evidence of disease activity' status in MS patients treated with interferon beta-1a in the EVIDENCE study. *Journal of the Neurological Sciences*. 2017;379:151-6.
93. European Medicines Agency. Assessment report: Aubagio. 2013.
94. Biogen Netherlands B.V. Summary of product characteristics: Plegridy. 2014.
95. European Medicines Agency. Assessment report: Tecfidera. 2013.
96. European Medicines Agency. Assessment report: Ocrevus. 2017.
97. Watkins C, Bennett I. A simple method for combining binomial counts or proportions with hazard ratios for evidence synthesis of time-to-event data. *Research Synthesis Methods*. 2018;9(3):352-60.
98. Haute Autorité de Santé. Commission de la Transparence: Alemtuzumab. 2016.
99. McCool R, Wilson K, Arber M *et al.* Systematic review and network meta-analysis comparing ocrelizumab with other treatments for relapsing multiple sclerosis. *Multiple Sclerosis and Related Disorders*. 2019;29:55-61.

100. Samjoo IA, Worthington E, Drudge C *et al.* Comparison of ofatumumab and other disease-modifying therapies for relapsing multiple sclerosis: a network meta-analysis. *Journal of Comparative Effectiveness Research.* 2020;9(18):1255-74.
101. European Medicines Agency. Assessment report: Mavenclad. 2017.
